# Supplementary material
Source: publisher site journal article supplement (https://www.spandidos-publications.com/5956/downloadSupplementary)
Supplement: Supplementary file 1 [file downloadSupplementary]

## Sheet: all_compare
Table SI. Results of the mRNA expression profiles between LUAD and benign tissues.
gene_id	gene_name	LC_1_fpkm	CON_1_fpkm	LC_2_fpkm	CON_2_fpkm	LC_3_fpkm	CON_3_fpkm	LCvsControl_LC	LCvsControl_Control	LCvsControl_log2FoldChange	LCvsControl_pvalue	LCvsControl_padj
ENSG00000155066	PROM2	14.3226	0.641351	8.32067	0.731003	4.26368	0.642704	983.038	73.6195	3.73846	1.4e-13	1.4e-09
ENSG00000047457	CP	18.4023	0.766137	76.9844	1.36156	19.3204	0.108366	5043.04	98.3076	5.68003	3.22e-12	2.16e-08
ENSG00000184368	MAP7D2	2.61178	0.0416531	1.71335	0.0814907	0.840529	0.0129054	136.214	3.58749	5.22472	5.99e-12	3.01e-08
ENSG00000102109	PCSK1N	39.0305	2.40714	99.6826	2.57894	14.8992	2.52746	1261.65	61.7103	4.3535	8.29e-12	3.34e-08
ENSG00000145113	MUC4	1.12439	0.0341897	0.175794	0.0334446	1.10048	0.0238343	308.488	11.7538	4.71381	2.87e-11	9.63e-08
ENSG00000124664	SPDEF	10.4037	0.539647	7.107	0.798485	3.87049	0.413081	246.599	20.1976	3.60497	3.38e-11	9.71e-08
ENSG00000181143	MUC16	0.0752713	0.00277244	0.10508	0.00116229	0.117013	0.00128848	78.5379	1.37952	5.86169	5.48e-11	1.38e-07
ENSG00000183914	DNAH2	0.639358	0.112835	0.749034	0.0532169	0.8328	0.0294973	230.629	20.3041	3.51345	9.66e-11	2.16e-07
ENSG00000158486	DNAH3	0.271725	0.00812272	0.22553	0.0204318	0.509046	0.00755002	90.7147	3.2547	4.77582	1.18e-10	2.38e-07
ENSG00000065618	COL17A1	7.67889	0.12898	7.11683	0.180241	0.513211	0.0559466	651.833	15.5483	5.38702	1.3e-10	2.38e-07
ENSG00000101443	WFDC2	132.533	11.5625	171.397	20.3847	85.9543	22.843	3246.85	456.277	2.83075	1.49e-10	2.49e-07
ENSG00000148735	PLEKHS1	2.74827	0.0449892	3.2319	0.188609	1.89881	0	256.473	7.60401	5.05594	7.82e-10	1.21e-06
ENSG00000181449	SOX2	0.773631	0.0725324	3.43106	0.0608158	2.47377	0	101.132	2.01928	5.64924	9.54e-10	1.37e-06
ENSG00000158125	XDH	10.5101	0.0301928	0.541132	0.126578	1.51888	0.056128	457.276	7.74483	5.87303	1.04e-09	1.39e-06
ENSG00000179913	B3GNT3	10.2925	0.10562	8.16931	0.287816	0.810508	0.14726	267.22	7.49699	5.14521	1.34e-09	1.68e-06
ENSG00000262406	MMP12	3.33234	0.194529	2.40052	0.353396	14.3473	0.0602712	226.753	6.86801	5.03591	1.48e-09	1.75e-06
ENSG00000171124	FUT3	4.11199	0.390852	6.02896	0.819288	3.13263	0.599436	248.672	33.9012	2.86992	3.36e-09	3.54e-06
ENSG00000177459	ERICH5	3.04435	0.0690039	5.50445	0.0867859	0.911956	0.128277	100.393	3.01438	5.05476	3.27e-09	3.54e-06
ENSG00000152669	CCNO	2.27967	0	4.52947	0.25345	6.58659	0	146.024	2.76279	5.66909	3.52e-09	3.54e-06
ENSG00000125999	BPIFB1	8.68215	0	1.81335	0.0657122	2.70635	0.254962	246.692	5.99217	5.3589	6.02e-09	5.77e-06
ENSG00000060718	COL11A1	6.6424	0.153716	7.31063	0.078452	0.290623	0.00621209	780.281	13.0587	5.90425	7.6e-09	6.95e-06
ENSG00000104140	RHOV	8.77651	0.0712703	1.35064	0.0896364	2.85611	0.264981	133.391	4.3756	4.92919	8.99e-09	7.86e-06
ENSG00000277363	SRCIN1	0.929836	0.0208468	1.68592	0.126725	0.662115	0.0920405	230.268	16.8326	3.76433	1.01e-08	8.44e-06
ENSG00000203499	IQANK1	3.68947	0.353669	5.78327	0.593078	1.78853	0.36274	338.072	39.3118	3.10143	1.2e-08	9.67e-06
ENSG00000112164	GLP1R	1.42302	0.0391356	0.655416	0.0492206	0.867587	0.0181881	55.1209	1.99347	4.77737	1.92e-08	1.48e-05
ENSG00000029993	HMGB3	16.6923	4.51817	30.2264	2.87656	13.4377	3.21733	1442.79	253.676	2.50834	2e-08	1.49e-05
ENSG00000140297	GCNT3	4.84044	0.00938347	0.70303	0.0629416	0.20802	0.0174437	224.408	3.50254	5.97835	2.76e-08	1.98e-05
ENSG00000179869	ABCA13	0.636265	0.0987468	0.409926	0.0186958	0.738752	0.0207255	205.156	15.8806	3.7039	4.78e-08	3.31e-05
ENSG00000066248	NGEF	2.14092	0.0519521	1.59129	0.02178	0.155038	0.0241446	109.577	2.75903	5.32677	5.61e-08	3.76e-05
ENSG00000188761	BCL2L15	0.764213	0.0945772	1.13931	0.0925161	0.436804	0.0366287	108.716	10.3926	3.38607	5.86e-08	3.8e-05
ENSG00000141934	PLPP2	8.69635	0.920966	6.75214	0.534043	2.00351	0.512019	742.346	83.6704	3.15026	6.84e-08	4.3e-05
ENSG00000173898	SPTBN2	3.78824	0.756166	3.81579	0.301159	1.95034	0.316283	555.12	79.8083	2.80058	8.32e-08	4.92e-05
ENSG00000176920	FUT2	9.13329	0.287612	6.68637	0.482304	1.01158	0.10025	342.808	17.723	4.26965	8.21e-08	4.92e-05
ENSG00000189127	ANKRD34B	8.27186	0.0452967	1.05139	0.0759593	0.154488	0.0140343	229.816	3.28052	6.12069	9.2e-08	5.28e-05
ENSG00000131746	TNS4	5.95574	0.100281	3.75665	0.189185	0.630595	0	302.09	8.45452	5.15159	1.02e-07	5.71e-05
ENSG00000165309	ARMC3	0.446121	0.0347238	0.206596	0.021836	1.10286	0.0161378	74.0414	3.06601	4.60432	1.09e-07	5.94e-05
ENSG00000105877	DNAH11	0.72546	0.220275	0.699641	0.165587	0.764219	0.172974	211.054	53.8725	1.97214	1.19e-07	6.28e-05
ENSG00000101210	EEF1A2	2.89167	0.0989946	2.83587	0.487645	1.96247	0.103517	227.523	20.4196	3.46692	1.36e-07	7.03e-05
ENSG00000007062	PROM1	1.75139	0.0899028	1.60649	0.0685275	0.404182	0	168.526	7.09706	4.57176	1.57e-07	7.91e-05
ENSG00000171631	P2RY6	16.1508	0.657091	8.17593	0.730325	1.329	0.369298	614.678	42.0887	3.86768	2.54e-07	0.000122958
ENSG00000070182	SPTB	2.60403	0.160149	4.85739	0.182482	0.294108	0.14504	691.47	43.4799	3.99086	2.57e-07	0.000122958
ENSG00000144452	ABCA12	1.81445	0.00645263	0.278692	0.0108206	0.0385126	0.0119954	120.948	1.66068	6.17786	3.85e-07	0.000179838
ENSG00000137825	ITPKA	3.4075	0.203301	6.5023	0.0730545	0.321924	0.0809858	128.982	4.50467	4.85228	4.95e-07	0.000226403
ENSG00000103316	CRYM	6.44899	0.979967	4.20562	0.767787	3.0957	0.298647	313.366	46.637	2.74889	5.13e-07	0.000229302
ENSG00000137648	TMPRSS4	43.1367	0.0122151	0.931333	0.0614516	4.50455	0	2911.69	4.41596	9.35711	6.13e-07	0.000267765
ENSG00000188910	GJB3	6.17021	0.0763611	0.874998	0.064026	0.347247	0	106.331	2.01928	5.71925	8.7e-07	0.000372212
ENSG00000086570	FAT2	1.80748	0.0417954	0.338928	0.00350439	0.0641459	0.00776971	193.639	4.64876	5.39961	1.02e-06	0.000426887
ENSG00000126778	SIX1	2.11023	0.223211	8.07644	0.224585	1.41788	0	380.684	14.6898	4.69515	1.17e-06	0.00048145
ENSG00000091844	RGS17	1.38725	0.107686	0.677989	0.0644934	0.275454	0.0428972	111.412	10.2372	3.44819	1.71e-06	0.000686625
ENSG00000108846	ABCC3	8.24809	2.5279	13.0571	2.8031	6.69251	2.49064	1621.98	453.127	1.83968	2.02e-06	0.000796128
ENSG00000128610	FEZF1	3.47344	0.0232611	1.49673	0.0585107	0.119001	0	80.1011	1.28705	5.92728	2.11e-06	0.000816071
ENSG00000104313	EYA1	0.0437877	0.00645126	0.540206	0.0108183	0.456553	0	59.0525	0.980071	5.88939	2.16e-06	0.000817105
ENSG00000170373	CST1	0.135122	0.0696766	10.195	0	4.27747	0	76.756	0.366118	7.72824	2.19e-06	0.000817105
ENSG00000203697	CAPN8	12.5724	3.1713	21.3722	3.64021	14.6974	5.78664	1521.82	394.148	1.94898	2.82e-06	0.00103093
ENSG00000198691	ABCA4	0.91167	0.270669	1.37496	0.0895839	0.850257	0.0595858	161.237	21.5799	2.90955	3.08e-06	0.0011067
ENSG00000230873	STMND1	0.34751	0.0421637	0.483141	0.0176764	1.81551	0.0195955	45.9545	1.37952	5.08281	3.15e-06	0.00111198
ENSG00000163082	SGPP2	47.2754	3.98861	14.6889	4.23001	11.0722	2.62395	1468.2	217.96	2.75169	3.35e-06	0.00116001
ENSG00000132821	VSTM2L	28.9905	3.00843	34.09	3.53665	5.8707	1.00898	813.943	89.1729	3.18977	3.9e-06	0.00132822
ENSG00000133477	FAM83F	0.079083	0.0185362	0.356179	0.0155419	0.154887	0.0137834	58.2817	4.72669	3.62808	4.4e-06	0.00147453
ENSG00000176435	CLEC14A	15.5664	76.6242	18.6389	52.5613	27.3764	92.6455	841.242	3030.34	-1.84868	5.24e-06	0.00172682
ENSG00000104783	KCNN4	20.2946	0.641809	12.2729	1.95821	2.37135	0.894837	717.507	71.7706	3.31958	5.33e-06	0.00172756
ENSG00000165449	SLC16A9	9.52401	0.589883	2.56345	0.62112	2.07033	0.739557	377.85	52.0575	2.85902	5.56e-06	0.00174654
ENSG00000134775	FHOD3	1.94528	0.198331	0.699266	0.153502	0.637399	0.0567223	157.52	19.6089	3.00662	5.65e-06	0.00174654
ENSG00000135744	AGT	4.55157	0.848649	16.5969	0.756034	2.48736	1.08462	326.298	37.1264	3.13618	5.51e-06	0.00174654
ENSG00000137745	MMP13	29.6437	0.0214389	2.68339	0.0179758	0.091399	0	553.618	0.673095	9.68537	6.74e-06	0.00205239
ENSG00000182013	PNMA8A	1.45051	0.509604	3.01388	0.592685	2.20059	0.443114	148.439	34.4185	2.10803	8.06e-06	0.00242006
ENSG00000010282	HHATL	3.56617	0	0.592784	0.105728	0.430065	0	79.9441	1.84186	5.3858	8.77e-06	0.00253885
ENSG00000117983	MUC5B	4.98916	0.00653382	0.020157	0	2.9415	0	891.037	0.732236	10.2868	8.64e-06	0.00253885
ENSG00000049283	EPN3	0.418814	0.0130887	1.70746	0.09877	0.390602	0.0486636	70.4021	4.49013	3.94899	9.21e-06	0.00260687
ENSG00000039139	DNAH5	0.547115	0.132764	0.295809	0.0247373	0.886738	0.0548459	171.713	21.0809	3.03467	9.59e-06	0.00267841
ENSG00000166105	GLB1L3	10.5379	0	0.407121	0.0740373	3.83397	0.0315674	796.603	5.69222	7.12061	9.8e-06	0.00269948
ENSG00000196754	S100A2	13.7602	0.426508	2.69993	0.455142	1.85136	0.792872	172.906	15.8117	3.45001	1.15e-05	0.00312778
ENSG00000143217	NECTIN4	2.99445	0.433738	9.7872	1.09102	3.69824	1.09658	347.767	55.3169	2.65047	1.2e-05	0.00321232
ENSG00000147889	CDKN2A	1.79638	0.603509	7.2247	0.859059	2.99174	0.626186	313.365	54.487	2.52296	1.31e-05	0.00345362
ENSG00000150594	ADRA2A	16.4076	1.54126	4.39017	1.27868	3.74877	0.980192	553.937	85.7568	2.69134	1.43e-05	0.0037353
ENSG00000115107	STEAP3	23.6324	4.67471	20.0623	4.81293	8.6758	3.30526	1439.66	351.676	2.03326	1.51e-05	0.00389086
ENSG00000127129	EDN2	6.43408	0.0741403	3.07145	0.497312	0.790192	0.137826	101.684	7.00508	3.84131	1.77e-05	0.00449374
ENSG00000198125	MB	3.09783	0.0560498	2.12439	0.211481	0.310639	0.026049	72.2815	3.83533	4.21262	1.91e-05	0.00480695
ENSG00000142273	CBLC	4.49245	0.0753353	6.10911	0.568494	0.867163	0.280095	111.472	8.98025	3.62014	2.02e-05	0.00501062
ENSG00000123843	C4BPB	1.68376	0.150998	4.1426	0.221562	0.434524	0.245616	121.444	11.9909	3.33788	2.08e-05	0.00502711
ENSG00000183317	EPHA10	0.491425	0.11925	1.43871	0.0749902	0.330454	0.0138553	111.046	10.2222	3.44578	2.08e-05	0.00502711
ENSG00000172061	LRRC15	1.69599	0.613717	3.38096	0.274442	1.37798	0.152119	231.044	37.2352	2.63709	2.15e-05	0.0051474
ENSG00000175600	SUGCT	4.30972	0.361528	1.61207	0.231804	1.03356	0.415106	119.742	17.3611	2.78765	2.43e-05	0.00567568
ENSG00000164749	HNF4G	0.404523	0.0126421	2.30665	0.105999	0.247922	0.0117508	85.6959	3.77619	4.47792	2.4e-05	0.00567568
ENSG00000164458	TBXT	0.0896359	0	3.64634	0.0581324	0.512335	0	67.3015	0.92093	6.12503	2.78e-05	0.00642193
ENSG00000135373	EHF	15.1917	4.76533	22.1617	6.55085	12.2485	3.64391	1310.94	395.386	1.72894	3.29e-05	0.00740143
ENSG00000105855	ITGB8	3.12525	0.593308	7.60065	0.305875	0.789585	0.59619	1051.68	136.569	2.9455	3.28e-05	0.00740143
ENSG00000198807	PAX9	1.435	0.120811	0.372706	0.00844132	0.480709	0.0655044	83.2205	7.08252	3.57115	3.31e-05	0.00740143
ENSG00000069011	PITX1	2.43304	0.0346101	4.91156	0.116077	0.0737752	0.193019	156.949	7.2717	4.42769	3.49e-05	0.00766739
ENSG00000154080	CHST9	0.173861	0.0105473	0.0139452	0.0176871	0.894817	0.00490184	75.1598	2.30045	5.0201	3.51e-05	0.00766739
ENSG00000188039	NWD1	0.442758	0.0681525	0.240289	0.114287	1.15639	0.0633473	98.8151	13.2038	2.89969	3.81e-05	0.00822956
ENSG00000176029	C11orf16	1.1299	0.0233057	0.0616276	0.058623	2.34484	0.043325	55.5541	1.96766	4.80512	3.91e-05	0.00837347
ENSG00000164626	KCNK5	9.48948	1.92497	19.6052	4.86919	11.2685	1.50357	913.544	187.803	2.28117	4.03e-05	0.00852009
ENSG00000156284	CLDN8	0.14244	0	0.0776901	0	2.15437	0	29.5896	0	7.31585	4.61e-05	0.00965374
ENSG00000134317	GRHL1	1.13352	0.290342	2.72755	0.749544	2.8795	0.369298	322.991	67.5246	2.25563	4.96e-05	0.0102813
ENSG00000187017	ESPN	0.65252	0.096136	1.92586	0.175869	0.402398	0.162469	124.87	18.2008	2.77508	5.12e-05	0.0105075
ENSG00000134398	ERN2	0.341833	0.0121565	0.267879	0.0509637	0.40424	0	30.5374	1.901	3.95961	5.48e-05	0.0111268
ENSG00000161798	AQP5	191.054	7.51014	3.1536	2.89174	48.5345	6.35147	2757.24	190.296	3.85714	5.59e-05	0.0112421
ENSG00000186007	LEMD1	3.77752	0.138149	0.487079	0.0694998	0.353376	0.0513635	61.192	3.43213	4.16419	5.85e-05	0.0116529
ENSG00000188817	SNTN	0.582672	0.0914439	0.115146	0.0219064	3.88732	0.121424	128.504	6.57982	4.29519	5.93e-05	0.0116846
ENSG00000159763	PIP	9.36569	0	0.640821	0.0870827	0.619889	0	37.4593	0.306977	6.69034	6.12e-05	0.0119417
ENSG00000174938	SEZ6L2	6.03466	4.40532	19.2717	2.34265	15.3272	1.44277	1006.34	202.854	2.31132	6.58e-05	0.0120666
ENSG00000156510	HKDC1	7.49729	0.427973	2.54003	0.789448	1.22853	0.530398	289.127	44.8562	2.68591	6.4e-05	0.0120666
ENSG00000169126	ARMC4	0.407319	0.0763771	0.516132	0.138752	2.02965	0.141984	84.9353	10.2711	3.0447	6.6e-05	0.0120666
ENSG00000133055	MYBPH	1.01181	0	1.1868	0.0846704	0.430512	0.0625752	28.596	1.60154	4.11634	6.28e-05	0.0120666
ENSG00000198183	BPIFA1	11.9897	0.168616	3.02203	0.329883	0.191693	0	99.0344	3.24719	4.91811	6.54e-05	0.0120666
ENSG00000234602	MCIDAS	0.084524	0	1.0757	0.0243632	1.16443	0	29.2908	0.306977	6.33981	6.5e-05	0.0120666
ENSG00000136918	WDR38	1.65654	0.219027	0.386116	0.110187	5.52786	0.203584	63.2731	4.45304	3.83761	6.79e-05	0.0122923
ENSG00000146197	SCUBE3	0.112124	0.206491	2.03122	0.103881	2.32404	0.0844502	198.022	17.5009	3.50369	6.96e-05	0.0124867
ENSG00000158113	LRRC43	0.4246	0.087579	0.733357	0.0734319	1.32546	0.142457	41.527	5.07451	3.03838	7.38e-05	0.0129536
ENSG00000168658	VWA3B	0.276588	0.0438844	0.0322345	0.0245303	1.3907	0.00679838	85.0722	3.76492	4.50581	7.38e-05	0.0129536
ENSG00000167646	DNAAF3	0.713667	0.0736014	0.12975	0	1.52183	0	47.0621	1.46447	5.06416	7.41e-05	0.0129536
ENSG00000154975	CA10	0.0132389	0	0.794289	0.0228959	1.21072	0.0253816	54.1194	1.29456	5.36153	7.49e-05	0.0129572
ENSG00000205213	LGR4	5.86344	1.90707	15.8805	2.88465	5.6054	1.62118	1044.85	244.997	2.09209	7.74e-05	0.0131807
ENSG00000109654	TRIM2	9.20734	3.67449	6.6879	2.11341	7.47531	1.7856	1327.3	430.126	1.62607	8.49e-05	0.0142295
ENSG00000174950	CD164L2	2.48238	0.208381	0.551025	0.1248	1.49755	0.249028	55.725	7.16045	2.96468	8.44e-05	0.0142295
ENSG00000120279	MYCT1	7.07736	22.1376	4.13588	12.5929	5.02662	14.892	296.512	906.023	-1.61166	8.71e-05	0.0142656
ENSG00000141579	ZNF750	1.49147	0.621816	4.16838	0.658573	1.88356	0.471505	168.776	39.1968	2.10631	8.73e-05	0.0142656
ENSG00000143502	SUSD4	4.57797	0.773987	2.50148	0.91936	1.88082	0.371698	254.308	58.6095	2.11586	8.6e-05	0.0142656
ENSG00000100625	SIX4	2.22097	0.538408	2.54178	0.137726	1.02707	0.0508929	232.288	29.1684	2.99849	8.97e-05	0.0145504
ENSG00000158023	WDR66	0.314399	0.180973	0.671299	0.0979984	0.60115	0.129664	154.093	39.6812	1.96147	9.19e-05	0.0147789
ENSG00000134258	VTCN1	0.428177	0.040144	2.06999	0.0336593	0.154029	0.0746272	48.3766	2.70741	4.16307	9.27e-05	0.0147952
ENSG00000153292	ADGRF1	1.88602	0.0832905	10.4207	0.579228	0.355086	0.241362	946.17	67.5438	3.80669	9.46e-05	0.0149726
ENSG00000162004	CCDC78	1.1507	0.13186	0.813582	0.3931	2.24859	0.245125	105.276	19.2438	2.44495	9.64e-05	0.0151435
ENSG00000141294	LRRC46	0.668519	0.236999	0.398809	0.0722601	4.04152	0.100131	86.8141	6.95673	3.6528	9.74e-05	0.0151647
ENSG00000146678	IGFBP1	0.142561	2.64644	0	0.708831	0.28206	1.94738	4.22952	52.8183	-3.63594	0.000103026	0.0158117
ENSG00000196090	PTPRT	0.31407	0.0375542	0.0537902	0.0196799	0.872555	0.0523595	96.7431	8.54748	3.50542	0.000106759	0.0162182
ENSG00000204866	IGFL2	3.86117	0	1.12583	0.0629967	0.0213541	0.0698361	73.2157	1.94184	5.21717	0.000107288	0.0162182
ENSG00000004848	ARX	0.0760907	0.0196183	3.30284	0.0328985	0.685826	0.127646	75.8566	3.3622	4.49577	0.000118935	0.0178447
ENSG00000153086	ACMSD	3.04614	0.0218161	3.19211	0.219505	0.111609	0	106.563	4.04984	4.69493	0.000123504	0.0183929
ENSG00000159212	CLIC6	3.92246	4.5175	61.0187	3.23345	15.7965	1.38991	1877.94	212.614	3.14302	0.000124642	0.0184259
ENSG00000170775	GPR37	1.73561	0.54302	5.17639	0.151768	0.720228	0.261714	138.938	17.4122	3.00264	0.000131656	0.0193208
ENSG00000176381	PRR18	0.0935427	0	0.272108	0	0.378379	0	14.1183	0	6.24941	0.000134799	0.0196386
ENSG00000138798	EGF	1.24038	0.208245	1.39851	0.299324	0.481946	0.119824	115.222	23.1636	2.31066	0.000136661	0.0197666
ENSG00000085552	IGSF9	0.346653	0.119169	3.14313	0.222896	0.500229	0.0852054	159.358	17.0649	3.21988	0.000139216	0.0199924
ENSG00000153347	FAM81B	1.93623	0.243519	0.236111	0.0612545	2.11788	0.0905397	64.5012	5.94333	3.45407	0.000155326	0.0218379
ENSG00000136695	IL36RN	0.214295	0.0184171	1.57465	0	0.0157032	0	35.8751	0.366118	6.63066	0.000173849	0.0242724
ENSG00000203952	CCDC160	1.44815	0.101829	1.04715	0.0853799	0.405179	0.126199	31.2853	3.3805	3.21126	0.000179706	0.0249171
ENSG00000183196	CHST6	2.54926	0.225552	0.546727	0.059099	0.258424	0.0393091	174.237	16.8274	3.37748	0.00018203	0.0250665
ENSG00000132470	ITGB4	28.4327	2.3365	9.05378	3.51126	7.53206	4.25999	1834.09	411.797	2.15481	0.000187479	0.0256412
ENSG00000126016	AMOT	1.66997	0.87185	3.55265	0.910773	2.25451	0.670888	383.066	125.698	1.60774	0.000198052	0.0265455
ENSG00000182489	XKRX	7.28553	0.432441	3.28759	1.51078	2.51958	0.686666	266.032	53.437	2.31166	0.000197245	0.0265455
ENSG00000147689	FAM83A	7.19978	0.0192363	5.08669	0.145161	0.442848	0	484.545	6.25782	6.26704	0.000205995	0.0274274
ENSG00000189366	ALG1L	2.65564	0.0720735	6.92458	0.302155	1.0447	0.602927	53.9723	4.96374	3.4358	0.000207381	0.0274302
ENSG00000183742	MACC1	5.79728	1.11105	6.33584	1.38964	2.17206	1.58616	853.215	243.756	1.80716	0.000217443	0.0285732
ENSG00000132746	ALDH3B2	2.33103	0.0939072	1.20849	0.220466	0.36832	0.226944	76.1779	10.5522	2.8445	0.000220401	0.0287738
ENSG00000204889	KRT40	0.132389	0	0.673942	0	0.209548	0	13.6204	0	6.19641	0.00025239	0.0327374
ENSG00000164287	CDC20B	0.0131035	0	0.22632	0.0113308	0.806572	0	28.3383	0.306977	6.29208	0.000259218	0.0334075
ENSG00000165238	WNK2	0.089276	0.0552429	0.373314	0.0154397	0.208036	0.012837	53.3343	6.64224	3.02218	0.000264911	0.0339238
ENSG00000163885	CFAP100	0.281209	0.0181259	0.0798842	0.0455937	1.39094	0.0168479	35.3888	1.62735	4.42372	0.000266639	0.033929
ENSG00000109881	CCDC34	2.63555	0.618484	2.33843	0.92798	1.70694	0.741289	150.284	51.4618	1.54298	0.000281217	0.0353538
ENSG00000155761	SPAG17	0.388561	0.0954114	0.196231	0.0266663	0.808097	0	80.1731	7.02665	3.52536	0.000281353	0.0353538
ENSG00000050030	NEXMIF	0.655198	0.0614286	0.0676818	0.0429213	0.357908	0.00951624	77.2987	8.14379	3.24886	0.000296607	0.037039
ENSG00000164855	TMEM184A	0.664236	0.264673	4.52176	0.430783	1.01552	0.34731	291.668	49.0431	2.57132	0.000305137	0.0373647
ENSG00000161055	SCGB3A1	214.065	27.2908	109.514	35.3472	944.859	111.413	6466.33	887.288	2.86548	0.000308507	0.0373647
ENSG00000107159	CA9	0.141109	0	6.28542	0.213535	0.899607	0.101451	73.7241	3.16975	4.51915	0.000306534	0.0373647
ENSG00000183690	EFHC2	2.11228	0.457653	0.661563	0.184188	1.48282	0.170154	85.1324	16.2397	2.39666	0.000315466	0.0377526
ENSG00000078900	TP73	0.104533	0.0628871	0.601823	0.0903919	0.857926	0.0167009	63.7489	6.92715	3.19782	0.000314944	0.0377526
ENSG00000215018	COL28A1	0.391627	0.156049	1.80429	0.184717	0.430469	0.0767891	104.754	16.6542	2.65187	0.000338294	0.040245
ENSG00000124143	ARHGAP40	0.424101	0.0190166	2.69867	0.143502	0.194573	0	63.8674	3.12891	4.32476	0.000361543	0.0425077
ENSG00000204385	SLC44A4	6.44691	3.04511	26.1419	4.03377	18.8661	5.84504	1045.52	262.603	1.99326	0.000367557	0.0429636
ENSG00000060140	STYK1	1.70339	0.0887237	1.8769	0.26781	0.257209	0.164936	79.1773	10.7592	2.87074	0.000391186	0.0454613
ENSG00000155265	GOLGA7B	3.26586	0.413959	3.0683	0.670515	0.665812	0.166152	272.403	48.668	2.4827	0.000394624	0.0455973
ENSG00000178031	ADAMTSL1	0.677511	0.360489	0.866943	0.186578	0.755141	0.268885	189.176	67.1242	1.49807	0.000408181	0.0468428
ENSG00000189057	FAM111B	0.564274	0.330292	3.74312	0.224188	0.657117	0.116954	115.563	15.6295	2.88893	0.000410064	0.0468428
ENSG00000119547	ONECUT2	0.090725	0	0.0428857	0.00313807	0.0287203	0	15.8798	0.306977	5.4513	0.000417506	0.0474235
ENSG00000122735	DNAI1	0.244453	0.0336144	0.0740724	0.0704611	1.97762	0.0312443	50.0179	2.94773	4.07513	0.000424726	0.0479726
ENSG00000167767	KRT80	2.24818	1.56434	12.3237	0.468445	2.16747	0.571233	438.778	68.2577	2.6863	0.000451674	0.0504495
ENSG00000166959	MS4A8	1.27725	0.235222	0.165867	0.15778	4.51263	0.196774	92.6997	9.17973	3.33929	0.000450663	0.0504495
ENSG00000143850	PLEKHA6	3.49152	1.64211	4.01122	1.27806	2.57424	1.16357	501.02	203.04	1.30351	0.000462575	0.0513816
ENSG00000115255	REEP6	7.50548	0.421758	4.70159	1.10249	2.39035	1.66033	215.418	46.9957	2.19423	0.000478711	0.0528818
ENSG00000095370	SH2D3C	7.16973	13.8495	6.49457	16.2485	8.47293	22.9218	621.49	1488.5	-1.26003	0.000496655	0.0545642
ENSG00000132517	SLC52A1	0.269557	0.0926659	1.70165	0.142445	0.618921	0.157909	61.4007	9.3168	2.71821	0.00052936	0.0569133
ENSG00000184261	KCNK12	0.564016	0.0272661	0.160222	0.0152411	0.054246	0.0168958	31.3595	2.39292	3.71896	0.000524046	0.0569133
ENSG00000105278	ZFR2	1.02087	0.0306652	0.297324	0.0428528	0.034862	0.0285031	48.4633	3.65415	3.72249	0.000529248	0.0569133
ENSG00000145451	GLRA3	0.184123	0	0.0446333	0.00530715	0.0539691	0	16.3534	0.306977	5.49323	0.000522816	0.0569133
ENSG00000171303	KCNK3	7.19493	27.6208	2.09983	15.3248	6.0854	13.7124	576.738	2124.61	-1.88128	0.000533669	0.0570714
ENSG00000039068	CDH1	19.2085	7.0722	21.068	11.5379	29.6136	9.70949	2601.43	1054.1	1.30315	0.000538575	0.0572913
ENSG00000157423	HYDIN	0.140941	0.0441253	0.0228787	0.00435264	0.61525	0.012063	109.89	8.53948	3.69727	0.000547725	0.0579579
ENSG00000183248	PRR36	0.383412	0.190891	1.22589	0.148623	0.84869	0.215453	65.9998	14.9015	2.15088	0.000553353	0.058247
ENSG00000087510	TFAP2C	4.46995	1.61752	6.73662	2.64465	5.55115	0.920876	303.443	93.8527	1.69145	0.000556611	0.0582848
ENSG00000188322	SBK1	0.944122	0.352961	6.28663	0.683735	1.10003	0.305449	250.598	40.3731	2.6322	0.000562799	0.0586073
ENSG00000186474	KLK12	0.96579	0	0.0908214	0	0.204994	0	13.4484	0	6.17282	0.000575737	0.05936
ENSG00000070729	CNGB1	0.250248	0.00832529	0.154103	0.0349023	0.127773	0.0154766	23.401	2.58161	3.14903	0.000588663	0.0600765
ENSG00000105976	MET	19.2332	3.72886	25.7691	10.0309	15.9338	6.42645	2584.66	856.216	1.59362	0.000598808	0.0605655
ENSG00000151320	AKAP6	2.33588	0.273823	0.423054	0.299242	0.84995	0.260236	429.452	99.1615	2.11407	0.00059948	0.0605655
ENSG00000174514	MFSD4A	13.6141	2.07773	19.7106	3.15866	2.55893	2.38967	1251.97	266.071	2.23404	0.000609671	0.0605766
ENSG00000119946	CNNM1	0.229663	0.0852677	0.4593	0.0238313	0.38775	0.0880619	41.6082	7.61903	2.4637	0.000603845	0.0605766
ENSG00000012223	LTF	6.27002	1.1731	29.6838	2.49499	2.25663	2.16748	977.872	149.342	2.71062	0.000611639	0.0605766
ENSG00000147697	GSDMC	5.46162	0.0414165	0.876145	0.364625	0.194224	0.0577445	115.484	8.19966	3.80325	0.000611641	0.0605766
ENSG00000162896	PIGR	176.255	22.0206	862.316	77.0087	135.953	95.9002	30971.1	5140.11	2.59103	0.000625351	0.0607689
ENSG00000177398	UMODL1	0.299504	0.0166963	0.220752	0.0209989	0.0782982	0.0310383	26.2502	3.01438	3.11717	0.000619001	0.0607689
ENSG00000127377	CRYGN	0.286822	0.0197202	1.30366	0.0826734	0.252215	0.0733192	34.2108	3.26222	3.37547	0.000625673	0.0607689
ENSG00000178965	ERICH3	0.167767	0.0276833	0	0.0174086	1.44575	0.0192986	85.3564	3.40631	4.65173	0.000622413	0.0607689
ENSG00000130307	USHBP1	0.990425	2.73558	0.848591	2.61854	1.54164	3.80859	105.421	285.727	-1.43757	0.000630245	0.0609186
ENSG00000144331	ZNF385B	2.68493	4.65697	2.46088	6.02494	2.52683	5.71123	245.503	524.535	-1.0957	0.000667791	0.0639331
ENSG00000077327	SPAG6	0.879075	0.218835	0.0275556	0.0655304	4.4648	0.0581159	125.812	8.02175	3.97813	0.000676906	0.0644985
ENSG00000133048	CHI3L1	359.149	17.3467	40.1029	26.3237	23.1511	4.20905	8674.51	983.256	3.14107	0.000693867	0.0658028
ENSG00000178473	UCN3	0.736415	0.202527	4.95378	0.424528	1.0361	0.0941235	48.6379	5.21485	3.21102	0.000704738	0.0663297
ENSG00000187905	LRRC74B	0.0212606	0	0.00966336	0	0.551514	0	19.4507	0	6.71088	0.000706021	0.0663297
ENSG00000109255	NMU	1.08763	0.0623159	3.89986	0.208998	0.265667	0.0579222	30.8633	1.93433	3.97153	0.000724382	0.066806
ENSG00000185090	MANEAL	1.63973	0.805274	5.37673	0.962151	2.26582	0.76721	168.808	46.0949	1.8724	0.000768957	0.0697548
ENSG00000132000	PODNL1	8.32531	1.66181	2.54409	0.452232	2.37398	0.514879	332.617	66.0271	2.33473	0.000770234	0.0697548
ENSG00000167759	KLK13	0.616431	0.030273	0.106735	0.0507657	1.10992	0	22.1691	0.980071	4.47756	0.000769148	0.0697548
ENSG00000165816	VWA2	5.76461	2.52161	10.3669	1.95995	4.08037	2.39515	402.041	136.787	1.55592	0.000777705	0.0701155
ENSG00000165474	GJB2	10.4822	1.28866	5.76351	0.320147	0.813904	0.044363	261.725	25.3626	3.37069	0.0008082	0.071678
ENSG00000139973	SYT16	0.0696099	0.0159533	0.126556	0.00668811	0.0544098	0	23.0023	2.07843	3.49052	0.000809296	0.071678
ENSG00000130675	MNX1	0.0981419	0.0144593	0.420584	0.0242472	0.221916	0	18.7535	0.980071	4.23572	0.000808723	0.071678
ENSG00000196748	CLPSL2	0.482105	0	0.701203	0	1.61096	0	10.2879	0	5.7928	0.00080547	0.071678
ENSG00000181374	CCL13	24.0222	8.63891	15.9845	3.17274	25.6285	8.69343	336.577	105.15	1.68029	0.000833248	0.0734757
ENSG00000103534	TMC5	14.8458	3.7255	13.2525	4.61383	6.05323	4.01935	1315.63	476.096	1.46616	0.000839011	0.0736608
ENSG00000167858	TEKT1	0.658505	0.189523	0.0835264	0.0794541	4.33616	0.176161	117.72	10.3189	3.51634	0.000845173	0.0738791
ENSG00000131747	TOP2A	3.08432	1.77451	14.1186	1.07632	2.42245	0.254427	761.237	120.448	2.66042	0.000866805	0.0747945
ENSG00000176601	MAP3K19	0.11641	0.0100046	0.0176369	0	0.68243	0.0185984	29.8789	1.04673	4.86198	0.000866032	0.0747945
ENSG00000204544	MUC21	0.310642	0.0800922	71.4717	0.940162	4.57545	0.163779	1745.24	27.0623	6.00946	0.000864868	0.0747945
ENSG00000106483	SFRP4	35.9753	9.30072	17.4653	4.54902	11.1339	3.72735	1403.15	381.936	1.87752	0.000880964	0.0756914
ENSG00000183054	RGPD6	0.0796782	0.588908	0.0402392	0.122488	0.089527	0.326734	16.797	83.2559	-2.30757	0.000890836	0.0760127
ENSG00000127241	MASP1	0.519256	0.835589	0.288911	1.18059	0.448732	1.28731	99.6799	261.987	-1.39527	0.000896046	0.0760127
ENSG00000172818	OVOL1	1.17857	0.110498	0.862658	0.251474	0.349943	0.102707	55.4596	10.7775	2.3523	0.000917818	0.0775325
ENSG00000174939	ASPHD1	3.79674	0.814661	2.24687	0.440686	1.05313	0.195412	98.8701	20.2116	2.2932	0.000958001	0.0805883
ENSG00000149927	DOC2A	0.146687	0.13237	6.9589	0.420168	0.596571	0.0439419	298.243	23.0969	3.68773	0.000968673	0.0811465
ENSG00000145545	SRD5A1	4.74971	1.01591	3.31808	1.39987	1.81301	0.973566	459.352	157.569	1.54263	0.000979138	0.0813453
ENSG00000197635	DPP4	17.1129	7.38702	33.3044	7.70914	12.6901	2.62697	1904.8	534.945	1.83214	0.000977047	0.0813453
ENSG00000108830	RND2	1.16392	0.446647	1.48865	0.479825	1.1782	0.544892	100.483	38.5946	1.3803	0.00100923	0.0835005
ENSG00000137642	SORL1	8.16043	2.97714	5.54295	3.49942	6.76829	3.25796	2399.21	1140.85	1.07232	0.00102215	0.0842226
ENSG00000087128	TMPRSS11E	28.2993	0	3.50683	0.190621	0.0484611	0.0528289	410.391	3.13642	7.02234	0.00107692	0.0883731
ENSG00000118492	ADGB	0.0985297	0.0234496	0.0275592	0.00655388	0.479861	0.00726542	28.382	1.74563	4.04846	0.00109654	0.089618
ENSG00000156234	CXCL13	8.60438	1.31621	8.98186	1.24599	1.26707	1.38127	162.572	34.0045	2.25695	0.001133	0.0914818
ENSG00000198535	C2CD4A	2.47966	0.458551	1.19701	0.147876	0.66166	0.0327861	90.0594	13.2694	2.76966	0.00113047	0.0914818
ENSG00000121207	LRAT	0.163605	0.0803464	0.410758	0.0943146	0.445295	0.0448089	46.4632	10.0007	2.21525	0.00114049	0.0917184
ENSG00000240204	SMKR1	2.90297	0.117407	2.84588	0.541427	0.700744	0.272822	40.2245	5.8105	2.77317	0.00115844	0.0927907
ENSG00000104368	PLAT	24.3914	9.31842	45.7373	4.54934	9.45609	7.36434	3173.76	846.716	1.90637	0.00117815	0.093987
ENSG00000123977	DAW1	0.461986	0.227868	0.602555	0.17369	1.55433	0.0770189	46.2853	8.45828	2.45697	0.00120987	0.0957651
ENSG00000212916	MAP10	1.77611	0.241926	1.12714	0.507115	1.10505	0.481861	84.9234	26.079	1.69736	0.00123223	0.0961085
ENSG00000243710	CFAP57	0.22486	0.158114	0.464559	0.123735	1.19536	0.0489887	65.464	11.491	2.51369	0.00123332	0.0961085
ENSG00000179813	FAM216B	1.26446	0.808147	0.550438	0.231001	8.1278	0.136576	198.193	23.4363	3.08424	0.00123313	0.0961085
ENSG00000099937	SERPIND1	0.369217	0.261785	2.62213	0.27936	1.37984	0.0221207	67.2463	8.66528	2.9554	0.00125164	0.0964698
ENSG00000198488	B3GNT6	0.381388	0	2.91633	0.252195	0.631287	0.107529	62.172	5.69222	3.43232	0.00125715	0.0964698
ENSG00000089101	CFAP61	0.120691	0.016596	0.0365708	0.0208727	0.657998	0.0308517	35.9703	3.01438	3.57686	0.00124847	0.0964698
ENSG00000196104	SPOCK3	0.0525776	0.054224	1.05149	0.0454648	0.265844	0.0126002	36.9984	3.03268	3.6118	0.00125405	0.0964698
ENSG00000174804	FZD4	5.82509	12.9285	6.05687	15.8357	8.32893	13.7839	899.158	1892.91	-1.07388	0.0012665	0.0968175
ENSG00000137962	ARHGAP29	3.85949	12.4811	3.42218	9.43128	4.57515	6.31896	1109.15	2640.91	-1.25151	0.00130908	0.0985951
ENSG00000183856	IQGAP3	0.463127	0.351463	3.92404	0.256908	0.468719	0.0921411	197.276	28.4592	2.79433	0.0012949	0.0985951
ENSG00000118322	ATP10B	0.182313	0.0429765	0.331459	0.0405385	0.123672	0	43.4433	5.69173	2.93151	0.00130017	0.0985951
ENSG00000197446	CYP2F1	0.354188	0.0202932	0.0715489	0.0170151	1.81681	0.113175	40.4586	2.71492	3.90203	0.00130937	0.0985951
ENSG00000172461	FUT9	0.171771	0	0.214701	0.00742669	0	0	31.9491	0.613953	5.63184	0.00131468	0.0986253
ENSG00000160188	RSPH1	1.43931	0.223674	0.62731	0.204592	6.46695	0.793813	153.649	22.0038	2.80492	0.00134378	0.0996924
ENSG00000029559	IBSP	0.266748	0	0.796734	0.0329517	0.301581	0	12.7169	0.306977	5.13534	0.00134081	0.0996924
ENSG00000124490	CRISP2	0.232859	0	0.0352795	0	1.97937	0.037203	20.5585	0.340304	5.82906	0.0013346	0.0996924
ENSG00000164683	HEY1	2.22383	5.45167	3.51285	7.3767	3.47824	12.8604	179.465	500.303	-1.47866	0.00140333	0.102596
ENSG00000181378	CFAP65	0.0784091	0.00577602	0.0152736	0.0339009	0.743659	0	53.0756	2.51495	4.37592	0.00140323	0.102596
ENSG00000183780	SLC35F3	0.663811	0.171149	1.17333	0.191337	1.73494	0.477246	68.7718	16.167	2.0904	0.00141297	0.102926
ENSG00000117650	NEK2	0.456839	0.19631	2.12833	0.131679	0.334766	0.127728	54.4568	8.49912	2.68393	0.00142341	0.103313
ENSG00000129654	FOXJ1	3.4353	0.989244	2.39281	1.62031	14.5156	1.79622	323.755	70.1147	2.20678	0.00143511	0.103788
ENSG00000149573	MPZL2	62.3466	14.4704	29.2955	14.984	29.4611	17.6207	3468.5	1348.27	1.36313	0.00146121	0.105216
ENSG00000135549	PKIB	6.52302	0.902872	3.79187	1.18749	1.10191	0.345558	236.108	50.3765	2.22708	0.00146534	0.105216
ENSG00000159708	LRRC36	1.5106	1.7999	0.75992	4.93327	1.70233	8.5618	96.1659	370.227	-1.94512	0.00153107	0.108388
ENSG00000091137	SLC26A4	1.31031	0.0838041	0.960285	0.228367	0.33048	0.262897	90.9073	20.0986	2.172	0.00151895	0.108388
ENSG00000101115	SALL4	0.204134	0.063158	0.445358	0.0794335	0.403885	0	36.6377	4.9595	2.88002	0.00152628	0.108388
ENSG00000156804	FBXO32	6.71587	2.82633	4.91005	1.97711	4.10517	2.03139	700.995	304.568	1.20289	0.0015544	0.10927
ENSG00000103021	CCDC113	1.21266	0.276778	0.388533	0.378186	2.26379	0.257264	138.038	32.5804	2.08191	0.00155382	0.10927
ENSG00000121211	MND1	1.83251	0.241263	0.815189	0.20229	0.651419	0.0373753	30.0386	4.37887	2.7773	0.0015623	0.109442
ENSG00000134716	CYP2J2	1.1428	0.345447	2.63294	0.783744	1.69796	0.472192	98.621	28.8525	1.7688	0.00157872	0.110209
ENSG00000103089	FA2H	1.77872	0.203824	0.685966	0.435015	0.96374	0.241122	67.7413	17.3869	1.95373	0.00160794	0.11186
ENSG00000206113	CFAP99	0.0566691	0.0350662	0.164846	0.0196011	0.548148	0.0108646	24.1076	2.05261	3.56856	0.00163996	0.113695
ENSG00000143858	SYT2	0.265238	0.156311	1.39156	0.0327652	0.139941	0.0217935	84.1681	9.87816	3.10094	0.00165304	0.114207
ENSG00000171346	KRT15	1.31678	0.180495	4.2501	0.900823	1.55364	0.543251	303.31	69.2013	2.12965	0.00166761	0.11482
ENSG00000142920	AZIN2	1.50898	0.676221	3.39665	0.722325	1.27953	0.706034	244.459	83.1804	1.55525	0.00173312	0.118923
ENSG00000137868	STRA6	1.29471	0.118514	0.139283	0.0132492	0.235783	0	77.3754	6.10572	3.67759	0.00174338	0.11922
ENSG00000148346	LCN2	8.81117	1.10262	5.89835	1.33894	5.02489	3.42803	190.029	56.52	1.74885	0.00175461	0.119581
ENSG00000115257	PCSK4	0.932171	0.272385	1.11572	0.335861	0.778714	0.372324	64.5878	22.406	1.52539	0.00177361	0.120468
ENSG00000187726	DNAJB13	0.678138	0.0699372	0.493162	0.205239	0.506869	0.0975093	35.1405	7.80397	2.15435	0.00178532	0.120526
ENSG00000204379	XAGE1A	1.48521	0	1.50012	0.0951323	0.0967413	0	19.8907	0.613953	4.93624	0.00178645	0.120526
ENSG00000275395	FCGBP	12.1272	1.04537	4.09891	2.62558	4.17286	0.248362	1593.18	306.102	2.37932	0.00179872	0.120948
ENSG00000132749	TESMIN	0.616099	0.0624975	0.376432	0.157206	0.319729	0.1065	46.1243	11.4656	1.99647	0.00181113	0.121376
ENSG00000184349	EFNA5	3.98746	0.884256	1.50249	0.4913	1.40799	0.722885	237.05	72.1137	1.71755	0.00183895	0.122547
ENSG00000165548	TMEM63C	0.120363	0.0190973	1.96947	0.152118	0.309381	0	91.9916	6.56479	3.79512	0.0018408	0.122547
ENSG00000168903	BTNL3	0.0241448	0	0.043897	0.501082	0.0849262	2.56911	2.2491	45.1412	-4.31775	0.00187489	0.124405
ENSG00000180347	ITPRID1	1.64235	0	0.606053	0	0.0214484	0.0233815	99.1091	1.02091	6.60415	0.00189455	0.125296
ENSG00000144354	CDCA7	3.24966	1.00388	4.35623	1.26905	2.06746	0.244042	229.313	59.6666	1.94121	0.0019071	0.125712
ENSG00000175643	RMI2	0.892133	0.45167	3.46511	0.476893	0.855809	0.295432	114.092	26.7882	2.09048	0.00191887	0.126074
ENSG00000138083	SIX3	0.0233505	0	0.7217	0	0.0821323	0	12.5758	0	6.08119	0.00193276	0.126574
ENSG00000184113	CLDN5	59.7207	204.228	19.0072	132.818	87.7013	220.132	3438.86	11512.8	-1.74322	0.00194512	0.126969
ENSG00000163207	IVL	7.306	0	9.87509	0.212954	0.529359	0	229.769	2.76279	6.3631	0.00201316	0.130563
ENSG00000169856	ONECUT1	0.198928	0.0157813	0.570319	0.013232	0.0269117	0	18.4705	0.673095	4.78032	0.00204681	0.132319
ENSG00000186684	CYP27C1	1.83653	0.135288	0.429293	0.0113434	0.0576764	0	62.8787	3.96816	4.00452	0.00205645	0.132516
ENSG00000177694	NAALADL2	0.823537	0.496184	0.898351	0.386048	1.08245	0.232677	229.684	91.3147	1.33183	0.00208936	0.134207
ENSG00000136114	THSD1	1.19258	6.42837	1.77792	5.7887	3.06216	4.22222	134.683	367.02	-1.44499	0.00212737	0.136212
ENSG00000151023	ENKUR	0.82386	0.104344	0.118251	0.237469	2.13524	0.0831317	75.5838	10.4372	2.85081	0.00214203	0.136716
ENSG00000011426	ANLN	1.26411	0.747852	3.99074	0.466049	0.887544	0.253626	222.523	53.1647	2.06677	0.00218072	0.138745
ENSG00000165125	TRPV6	0.0988062	0.02038	0.202092	0.0512637	0.291064	0.0568293	42.5373	9.23184	2.19876	0.0021915	0.138991
ENSG00000139874	SSTR1	0.507518	0.480971	1.02246	3.92602	0.506591	6.0616	52.7084	270.938	-2.36185	0.00220115	0.139164
ENSG00000105519	CAPS	7.6787	1.89822	5.71229	4.43905	19.5865	3.44607	814.145	241.53	1.75264	0.00221536	0.139623
ENSG00000034053	APBA2	4.0825	1.1145	4.01521	1.80219	2.3606	1.43878	432.885	180.279	1.2626	0.00223602	0.140485
ENSG00000277639	AC007906.2	5.79328	1.13366	0.540135	0.513801	6.42664	0.711978	152.473	28.1935	2.43747	0.00225515	0.140807
ENSG00000164509	IL31RA	0.20599	0.0132775	0.807528	0.0333982	0.011321	0.0123414	28.2592	1.62735	4.10065	0.00225296	0.140807
ENSG00000170509	HSD17B13	0.884804	0.30417	0.111711	0.446312	8.14788	0.117802	132.081	12.5414	3.39507	0.00227067	0.141337
ENSG00000140284	SLC27A2	1.74511	0.151786	2.42734	0.727243	1.14629	0.0604648	89.8038	15.8628	2.49079	0.00230986	0.142891
ENSG00000114248	LRRC31	0.208174	0.117105	3.69874	0.540036	6.34041	0.689373	192.224	25.2585	2.92624	0.00230679	0.142891
ENSG00000046604	DSG2	28.1242	7.31255	20.5566	6.61687	7.93394	5.71128	2111.73	732.598	1.52727	0.00237007	0.146091
ENSG00000159166	LAD1	10.3039	3.03615	15.8264	4.09654	4.13607	2.69233	635.048	206.148	1.62276	0.00240113	0.146732
ENSG00000163576	EFHB	0.268881	0.058379	0.218694	0.0856602	1.14486	0.122092	40.9506	6.67605	2.61622	0.00239908	0.146732
ENSG00000174844	DNAH12	0.0665686	0.036615	0.0645476	0.0537256	0.788294	0.025525	73.5465	9.26844	2.9865	0.00243312	0.148236
ENSG00000131771	PPP1R1B	24.8253	2.98853	5.92696	4.34036	8.55453	4.42715	1078.65	322.606	1.74101	0.00244861	0.148729
ENSG00000164309	CMYA5	0.531835	0.351375	1.23886	0.305394	0.741689	0.115505	214.659	65.9835	1.70248	0.00246144	0.149058
ENSG00000135069	PSAT1	2.88104	1.7772	4.06308	0.977889	3.33844	0.490406	135.571	42.7904	1.66686	0.00249274	0.1505
ENSG00000173848	NET1	24.934	9.66306	71.5127	16.3873	24.0598	13.7702	3031.69	1001.8	1.59744	0.00251316	0.150941
ENSG00000153789	FAM92B	0.68072	0.191464	0.112509	0.0802679	4.27173	0.237286	58.1114	5.84007	3.32138	0.00251506	0.150941
ENSG00000179914	ITLN1	1.27122	3.48242	9.24472	1.0649	138.368	0.837782	1330.47	48.123	4.7897	0.00253238	0.151246
ENSG00000166535	A2ML1	0.282345	0	0.0439992	0	0.0141873	0.007733	14.9857	0.340304	5.36672	0.00253518	0.151246
ENSG00000127920	GNG11	35.9457	78.2793	18.3014	51.8105	25.1309	54.8843	1461.27	3405.18	-1.22057	0.00257505	0.152269
ENSG00000113924	HGD	3.85118	0.224049	0.718127	0.358636	0.329968	0.208252	88.065	14.2172	2.62647	0.00257168	0.152269
ENSG00000101331	CCM2L	2.91492	5.77753	2.02873	6.45899	3.56447	6.67997	132.632	294.886	-1.15269	0.00264804	0.155669
ENSG00000086967	MYBPC2	0.333651	0.0655426	1.15543	0.137388	0.195596	0.0152303	37.6422	4.87454	2.93709	0.00264066	0.155669
ENSG00000157064	NMNAT2	1.95692	0.288314	0.523211	0.135091	0.24583	0.0709375	117.694	21.3433	2.46537	0.00275371	0.161409
ENSG00000137573	SULF1	15.2232	9.58146	41.3332	1.69558	9.16668	1.30916	3724.33	713.223	2.38479	0.00278709	0.162454
ENSG00000087237	CETP	0.986422	2.26264	0.788473	2.19127	0.388836	1.59771	45.1647	126.319	-1.48667	0.00281216	0.162971
ENSG00000185924	RTN4RL1	7.1671	2.07834	3.10246	2.24853	4.85895	1.74486	330.462	132.629	1.31641	0.00281278	0.162971
ENSG00000183036	PCP4	0.905538	0.549349	11.718	0.0460609	0.0468399	0.204246	84.4431	5.32937	3.99703	0.00282437	0.163172
ENSG00000169894	MUC3A	0.056976	0.0801274	1.03116	0.0447893	0.223179	0	89.8748	8.56154	3.39599	0.00284466	0.163874
ENSG00000164542	KIAA0895	2.34672	1.03852	1.99794	0.86319	1.53228	0.747057	238.262	107.386	1.14989	0.00285804	0.164174
ENSG00000174564	IL20RB	5.31243	0.294822	1.34265	0.370797	0.167586	0.296872	101.671	14.343	2.82318	0.00286739	0.164242
ENSG00000185156	MFSD6L	0.565438	0.22215	3.50012	0.279397	1.46797	0.61946	72.957	14.78	2.304	0.00293541	0.16766
ENSG00000112539	C6orf118	0.631213	0.0813723	0	0	2.77527	0.075635	45.9803	2.11927	4.45803	0.00294435	0.167695
ENSG00000161905	ALOX15	0.848046	0.660413	0.346121	0.0598629	6.46801	0.165905	157.166	18.1773	3.11823	0.00295694	0.167936
ENSG00000070526	ST6GALNAC1	3.34889	0.0528637	4.86152	1.19676	9.19508	1.7034	361.636	61.3551	2.55806	0.00299281	0.169018
ENSG00000226690	AC013470.2	0.0788242	0	0.0143308	0	0.374293	0	10.5263	0	5.82544	0.00298579	0.169018
ENSG00000110786	PTPN5	0.0750214	0.0994764	0.0584548	0.556049	0.0565454	0.369851	6.29429	33.9646	-2.43876	0.00301767	0.169394
ENSG00000140263	SORD	2.52526	1.39095	2.5825	1.36478	2.67478	1.24703	288.835	148.555	0.959367	0.00303317	0.169394
ENSG00000149328	GLB1L2	3.77919	0.650978	0.48552	0.587808	3.35167	0.667139	334.116	83.6094	1.99861	0.00302667	0.169394
ENSG00000139263	LRIG3	3.04913	4.49524	44.8119	5.4894	16.7643	3.97705	2294.86	495.784	2.21061	0.00308127	0.170426
ENSG00000108602	ALDH3A1	4.73651	0.279133	0.410064	0.59811	1.05778	0.230624	146.48	26.1559	2.48171	0.00309886	0.170426
ENSG00000099953	MMP11	18.5527	3.545	15.1993	0.314951	0.970843	0.250948	1082.99	128.218	3.07926	0.00308348	0.170426
ENSG00000103449	SALL1	0.0312261	0.0107346	0.463633	0	0.00915282	0	17.19	0.366118	5.56977	0.00309079	0.170426
ENSG00000163235	TGFA	6.35071	1.83633	6.34494	2.21716	2.50518	1.78651	454.6	174.652	1.37952	0.0032477	0.176473
ENSG00000178222	RNF212	2.82614	0.267175	1.62708	0.47858	0.310643	0.316065	143.617	32.011	2.16266	0.00324298	0.176473
ENSG00000166342	NETO1	0.171104	0	0.116655	0.0092473	0.0376148	0	10.8012	0.306977	4.89526	0.00324119	0.176473
ENSG00000108379	WNT3	0.598104	0.532719	5.14043	0.505437	1.02797	0.390915	176.714	37.3216	2.24378	0.00326835	0.177116
ENSG00000100228	RAB36	1.54922	0.843244	1.57781	0.694626	3.50664	0.893796	164.171	60.1792	1.44944	0.00340206	0.183867
ENSG00000248771	SMIM31	0.110809	0	0.201458	0.0159697	0.194878	0	9.74856	0.306977	4.75258	0.00345839	0.18641
ENSG00000167281	RBFOX3	0.304322	0.0123079	0.0108486	0.00515986	0.0419771	0	21.2479	1.03921	4.37175	0.00349647	0.187458
ENSG00000114631	PODXL2	4.55459	3.08515	21.7304	3.07618	4.8582	2.2476	410.234	110.766	1.88904	0.00354974	0.189807
ENSG00000116032	GRIN3B	0.233426	0.0555544	0.587613	0.201848	1.43683	0	44.6399	5.08905	3.11752	0.00358176	0.191011
ENSG00000075643	MOCOS	1.7446	0.773864	3.00982	0.697521	1.03099	0.647371	218.968	80.1913	1.44941	0.00360051	0.191503
ENSG00000164418	GRIK2	0.155341	0.0640822	1.2003	0.100745	0.150258	0.089346	68.8285	11.6172	2.56471	0.00362436	0.192095
ENSG00000166922	SCG5	1.556	0.857694	5.9261	0.231982	0.542584	0.102867	106.189	15.7806	2.75645	0.00363074	0.192095
ENSG00000164379	FOXQ1	22.9121	1.73669	33.4918	8.75899	24.8368	12.2291	1130.36	316.186	1.83755	0.00365641	0.192685
ENSG00000117724	CENPF	0.53924	0.467769	2.11652	0.217893	0.633713	0.111112	231.717	56.1264	2.04763	0.00366106	0.192685
ENSG00000166292	TMEM100	15.7521	2.73892	5.63924	67.0363	2.69186	89.2392	421.723	2784.52	-2.72329	0.00374055	0.196354
ENSG00000163075	CFAP221	1.59258	0.58524	1.11491	0.728139	1.3414	0.625866	235.562	112.824	1.06079	0.00377964	0.197376
ENSG00000013573	DDX11	0.668349	0.4571	1.29185	0.383261	0.94652	0.364175	146.674	60.7814	1.27246	0.00379346	0.197584
ENSG00000005471	ABCB4	0.304973	0.0393154	0.311886	0.0725219	0.134088	0.0730867	34.9654	8.61038	2.01377	0.00383554	0.198746
ENSG00000149418	ST14	34.3593	10.5174	29.5472	16.0676	20.8887	13.5798	2222.69	1052.82	1.07782	0.00387997	0.199554
ENSG00000064655	EYA2	3.17526	1.17553	1.68745	0.971556	2.26235	0.59315	155.337	59.7412	1.37868	0.00387603	0.199554
ENSG00000215045	GRID2IP	0.584287	0.117577	1.5416	0.271106	0.35088	0.191252	61.6983	14.4467	2.08892	0.00388091	0.199554
ENSG00000185985	SLITRK2	0.0842963	0.173872	0.0315529	0.21439	0.0218016	0.161613	9.85484	39.3672	-2.01123	0.00394884	0.202529
ENSG00000186081	KRT5	5.03755	0.169873	0.212121	0.201779	5.06945	0	266.883	9.61202	4.79433	0.00410615	0.209528
ENSG00000276043	UHRF1	0.973299	0.472365	2.72716	0.554485	0.765243	0.274413	138.45	40.343	1.77832	0.00412356	0.209884
ENSG00000145824	CXCL14	68.9956	2.09192	590.535	14.9606	1.67874	1.20097	7869.08	217.235	5.17864	0.00418849	0.212651
ENSG00000088538	DOCK3	0.471037	0.152676	0.850263	0.128013	0.183433	0.13546	79.3841	21.9545	1.85509	0.00420414	0.212907
ENSG00000134709	HOOK1	3.23421	1.66325	3.96229	1.86194	2.77499	1.45405	406.066	202.768	1.00153	0.00424835	0.214068
ENSG00000092850	TEKT2	1.84662	0.98294	0.947625	0.231795	4.76669	0.456818	90.1197	19.9234	2.18457	0.00424134	0.214068
ENSG00000145358	DDIT4L	1.3774	0.304399	1.57408	0.391348	0.484482	0.301799	61.9893	17.9971	1.78095	0.00427562	0.214179
ENSG00000138180	CEP55	1.3328	0.780139	4.044	0.51395	0.886909	0.207181	123.461	29.5908	2.06269	0.0042907	0.214179
ENSG00000121690	DEPDC7	1.52331	0.164408	0.982205	0.336967	0.311515	0.0679184	56.4588	11.4098	2.29792	0.00431343	0.214179
ENSG00000164746	C7orf57	0.388439	0.160241	0.470807	0.268712	2.14051	0.0744714	41.1231	6.90134	2.57019	0.00432513	0.214179
ENSG00000144119	C1QL2	2.10507	0.118958	0.340777	0.0498711	0.0507146	0	30.7347	2.07843	3.89803	0.00432401	0.214179
ENSG00000117501	MROH9	0.0768901	0.0158596	0.0419376	0.0265953	0.703174	0	18.9759	0.980071	4.25877	0.00428372	0.214179
ENSG00000158315	RHBDL2	0.843123	0.586928	5.32669	0.400985	0.537511	0.26267	112.966	21.0626	2.42493	0.00434776	0.214771
ENSG00000137726	FXYD6	4.58736	10.1125	2.57503	7.81455	4.92132	8.44309	374.048	816.282	-1.1258	0.00437258	0.214941
ENSG00000184949	FAM227A	0.103826	0.112713	0.546422	0.0803299	0.466105	0.0104766	72.5235	13.2216	2.45862	0.00436948	0.214941
ENSG00000171388	APLN	4.46674	199.335	4.37792	10.5701	2.06897	2.51975	210.773	4102.53	-4.28279	0.00438564	0.215057
ENSG00000180921	FAM83H	6.64779	3.6429	13.9048	4.29784	7.08264	4.08523	941.536	409.726	1.2003	0.00441986	0.215912
ENSG00000135697	BCO1	0.180962	0.0622095	0.804229	0.104321	0.335937	0.0385489	23.3255	3.62082	2.67887	0.00442456	0.215912
ENSG00000082196	C1QTNF3	7.18293	0.69661	1.93191	1.3961	1.56458	0.80542	230.125	62.4501	1.87927	0.00449608	0.218342
ENSG00000151575	TEX9	2.34516	0.461731	0.458668	0.227371	0.649906	0.143059	172.529	41.57	2.05443	0.00452608	0.21927
ENSG00000111816	FRK	0.587796	0.52813	2.23852	0.673854	1.96569	0.396984	382.028	127.473	1.58342	0.00457529	0.220637
ENSG00000137203	TFAP2A	0.583863	0.0881189	0.116507	0.0246282	0.137746	0.00682549	41.7866	5.96163	2.82064	0.00463113	0.222748
ENSG00000178531	CTXN1	2.63583	2.09839	3.36291	0.639791	6.70943	0.930892	97.5597	28.1672	1.79904	0.00469508	0.224749
ENSG00000112796	ENPP5	4.73903	1.58164	6.02863	3.04657	4.77471	2.4767	399.349	182.555	1.12816	0.00481716	0.229635
ENSG00000072133	RPS6KA6	0.547418	0.285853	0.6488	0.257653	0.530114	0.159419	88.443	36.012	1.2969	0.00484285	0.229635
ENSG00000174607	UGT8	1.49195	0.2586	1.04852	0.726368	1.23476	0.312477	106.897	36.7377	1.53468	0.00482842	0.229635
ENSG00000230453	ANKRD18B	0.0100586	0	0.265166	0	0.0176899	0	10.3379	0	5.79843	0.00483518	0.229635
ENSG00000163060	TEKT4	0.0265614	0	0.0241453	0	0.794125	0	11.2914	0	5.92712	0.0049016	0.231874
ENSG00000176532	PRR15	8.97668	0.183929	0.675509	0.436951	2.95356	1.45317	150.553	24.7708	2.60233	0.00497118	0.232973
ENSG00000222046	DCDC2B	0.283691	0.0650165	0.171924	0	1.33046	0.0906487	20.1154	1.75315	3.54698	0.00494703	0.232973
ENSG00000165300	SLITRK5	0.14796	0.00863734	0.0279154	0.0265544	0.115379	0.0214089	37.0368	7.19753	2.35237	0.00498395	0.233029
ENSG00000182134	TDRKH	4.38494	0.954563	4.73281	1.86085	2.03476	1.49725	342.199	132.328	1.36929	0.00500222	0.233185
ENSG00000179044	EXOC3L1	5.28438	8.60919	2.40185	7.31783	3.31673	8.95657	204.012	461.38	-1.17802	0.00509239	0.235904
ENSG00000034239	EFCAB1	0.953978	0.20933	0.0461278	0.16674	2.27567	0.126471	114.587	17.5789	2.70559	0.00508913	0.235904
ENSG00000122861	PLAU	34.1297	11.0188	36.4714	7.71921	7.35806	4.38392	1385.82	411.021	1.75352	0.00519686	0.23992
ENSG00000131055	COX4I2	22.3581	36.1216	6.80055	31.4628	10.1666	37.3234	164.219	438.086	-1.4167	0.00527901	0.241402
ENSG00000163485	ADORA1	1.15268	0.434917	4.81746	0.826568	1.10013	0.673755	178.555	48.8732	1.86794	0.00529613	0.241402
ENSG00000128165	ADM2	0.303108	0.227345	1.91623	0.178707	0.339228	0.0396217	65.9254	11.4835	2.52318	0.00529067	0.241402
ENSG00000129173	E2F8	0.170763	0.17611	1.11248	0.0615258	0.350372	0.0272822	40.7538	6.60891	2.63661	0.00527912	0.241402
ENSG00000169064	ZBBX	0.48946	0.152966	0.013483	0.0256512	1.85204	0.0426542	56.3657	5.29605	3.42408	0.00530712	0.241402
ENSG00000113946	CLDN16	0.147982	0	0.0896807	0.0142181	0.173503	0	8.8773	0.306977	4.61559	0.00530536	0.241402
ENSG00000259417	CTXND1	0.205213	0.335095	0.13991	1.44919	0.46617	1.31145	33.6833	128.529	-1.93117	0.00542492	0.246203
ENSG00000125398	SOX9	6.33298	4.13803	4.62731	0.996858	12.8887	2.22452	565.5	174.504	1.69753	0.00552948	0.250383
ENSG00000160298	C21orf58	0.343614	0.331511	1.37035	0.230036	1.50103	0.382515	102.968	30.2358	1.77078	0.00555546	0.250995
ENSG00000183908	LRRC55	0.250463	0.0786147	0.217781	0.0376661	0.201091	0.0104388	21.8202	4.13104	2.4141	0.00560184	0.252267
ENSG00000117322	CR2	0.603001	0.186565	1.16208	0.0729997	0.0848393	0.0462429	54.4547	9.00182	2.60363	0.00560872	0.252267
ENSG00000131634	TMEM204	17.7286	56.2167	15.5404	45.0452	44.6935	147.213	961.661	3064.92	-1.67214	0.0058109	0.260196
ENSG00000161082	CELF5	0.0586785	0	0.328936	0.0253702	0.0601983	0	16.2555	0.92093	4.07626	0.0057999	0.260196
ENSG00000159625	DRC7	0.0914979	0.0589769	0.0311907	0.00988999	0.814638	0.0109637	29.0938	2.47787	3.57751	0.00583995	0.260916
ENSG00000214595	EML6	0.114347	0.0800223	0.898389	0.109472	0.143643	0.046977	100.523	20.5562	2.28864	0.00589676	0.262597
ENSG00000134028	ADAMDEC1	18.9692	0.672873	6.63389	2.65373	0.40373	0.370626	382.066	54.3161	2.81237	0.00591677	0.262597
ENSG00000269855	RNF225	1.36869	0.122743	1.02781	0	0.104657	0	14.9209	0.732236	4.4161	0.00590882	0.262597
ENSG00000204839	MROH6	1.89784	0.716745	5.13918	1.06325	2.19772	1.49897	245.292	87.0956	1.49349	0.00600227	0.265805
ENSG00000182533	CAV3	0.0602385	0.155312	0.0547591	0.833429	0.185396	1.06827	3.5406	24.2451	-2.76789	0.00606539	0.26801
ENSG00000170890	PLA2G1B	11.0809	27.903	4.11311	17.8062	15.0218	45.852	116.164	352.006	-1.59914	0.00611421	0.268398
ENSG00000101213	PTK6	5.19764	0.865909	5.6153	2.76584	5.87135	2.70202	296.282	112.476	1.3957	0.00610015	0.268398
ENSG00000118785	SPP1	574.892	15.1829	463.738	53.5992	89.3251	0.5353	15775.6	969.472	4.02427	0.00610711	0.268398
ENSG00000101230	ISM1	6.72515	3.63189	4.81225	1.49313	7.27227	2.72243	293.901	122.617	1.263	0.00616127	0.269195
ENSG00000105479	CCDC114	0.575565	0.14133	0.398637	0.213301	1.50631	0.315278	64.2579	17.3541	1.88811	0.00621269	0.269195
ENSG00000002746	HECW1	0.139215	0.0304551	0.076698	0.0218876	0.070483	0.0121319	24.1005	5.4256	2.15342	0.00619939	0.269195
ENSG00000197748	CFAP43	0.516639	0.245265	0.11182	0.170189	2.20661	0.102194	122.729	22.4088	2.45515	0.00616788	0.269195
ENSG00000178401	DNAJC22	0.518907	0.380555	2.70445	0.0797704	0.294058	0.0110539	108.287	14.5119	2.90601	0.00618225	0.269195
ENSG00000132164	SLC6A11	0.677062	0.0634785	0.0879251	0	0.0850529	0	34.3188	2.56283	3.77282	0.00624709	0.270103
ENSG00000186710	CFAP73	0.341328	0.176008	0.093084	0.265637	4.65224	0.098159	52.9043	5.61429	3.2336	0.00640798	0.276065
ENSG00000178395	CCDC185	0.0286822	0	0.677903	0	0.050443	0	9.3698	0	5.65666	0.00641245	0.276065
ENSG00000133665	DYDC2	0.119499	0.098593	0.238985	0.0206667	1.07183	0.0458208	21.2454	2.45206	3.14003	0.00644924	0.277056
ENSG00000134121	CHL1	5.11101	0.466147	2.54204	0.738745	0.231487	0.495178	563.528	121.508	2.21284	0.00647162	0.277424
ENSG00000185055	EFCAB10	0.228523	0.0707036	0.145415	0.0395216	0.783706	0.0438124	17.9836	2.39292	2.92316	0.00654172	0.279833
ENSG00000159259	CHAF1B	0.725192	0.4986	1.77887	0.437966	1.09319	0.47448	110.94	43.517	1.35171	0.00663679	0.28276
ENSG00000064989	CALCRL	23.5883	28.332	11.3402	55.3628	7.63921	30.6177	1575.98	4232.16	-1.42531	0.00668254	0.282847
ENSG00000143845	ETNK2	3.49106	1.45373	2.4909	0.854372	1.72606	0.9345	207.712	87.3804	1.25018	0.00667075	0.282847
ENSG00000145832	SLC25A48	0.0211133	0.0145163	0.307085	0	0.0185659	0	17.4916	0.732236	4.64216	0.00667982	0.282847
ENSG00000160401	CFAP157	0.375802	0.245461	0.307456	0.216642	2.05986	0.0360243	77.7388	14.1167	2.46261	0.00670573	0.282994
ENSG00000185915	KLHL34	0.032361	0	0.573639	0	0.0142282	0.0155106	13.6079	0.340304	5.23285	0.00671415	0.282994
ENSG00000203805	PLPP4	1.98028	0.136152	1.2301	0.142698	0.0290224	0	34.8434	2.99936	3.53446	0.00673372	0.283225
ENSG00000158164	TMSB15A	1.20407	2.92703	1.17272	5.80085	0.680649	1.97866	12.6202	44.1934	-1.81396	0.00680973	0.28563
ENSG00000154760	SLFN13	2.15344	1.33513	6.72802	1.64369	2.16571	0.853559	621.018	215.437	1.52721	0.00681932	0.28563
ENSG00000187510	PLEKHG7	0.118063	0.0936611	0.346737	0.054972	0.311453	0.0261172	30.3434	6.83093	2.16059	0.00690039	0.288425
ENSG00000080573	COL5A3	2.87147	37.1749	2.29292	2.83773	4.32859	4.53466	386.122	1811.94	-2.23025	0.00696606	0.288864
ENSG00000198088	NUP62CL	1.10443	0.195259	1.72108	0.245576	0.527206	0.42348	37.7189	9.72376	1.954	0.00696838	0.288864
ENSG00000166596	CFAP52	0.287101	0.0197394	0.0173991	0.0165508	2.84439	0.201824	58.4042	4.41644	3.72759	0.00695108	0.288864
ENSG00000047617	ANO2	0.32965	2.85577	0.316788	0.49681	0.530059	0.866749	44.3441	159.033	-1.84034	0.00701568	0.289631
ENSG00000165730	STOX1	0.0905428	0.217882	1.3855	0.156588	0.968689	0.0578628	57.512	10.1706	2.50295	0.00700545	0.289631
ENSG00000006453	BAIAP2L1	12.8435	2.96319	6.23945	4.06655	5.96005	3.90776	724.044	316.225	1.19456	0.00705772	0.289907
ENSG00000086548	CEACAM6	160.95	20.6641	568.954	83.4423	87.3318	98.4596	15029.7	3725.37	2.01233	0.00707775	0.289907
ENSG00000187288	CIDEC	0	0.757109	0	0	0	0.175932	0	10.8287	-5.89252	0.00714158	0.290621
ENSG00000134259	NGF	0.112537	8.9367	1.07416	1.31373	1.08855	2.26544	14.3546	78.9633	-2.4529	0.00715531	0.290621
ENSG00000079385	CEACAM1	3.01818	0.560944	18.6917	3.27388	2.29765	1.07346	799.132	163.381	2.28939	0.00712874	0.290621
ENSG00000146555	SDK1	1.03057	1.16358	2.64619	0.612401	2.42232	0.500973	443.304	165.497	1.42264	0.00720447	0.291554
ENSG00000198039	ZNF273	0.449407	0.238762	1.23177	0.24141	0.826293	0.430801	130.729	47.4941	1.46174	0.00722178	0.291554
ENSG00000171811	CFAP46	0.115646	0.0624731	0.0600722	0.0619054	0.707004	0.0316737	56.9042	10.0598	2.50114	0.00721806	0.291554
ENSG00000163689	C3orf67	0.130849	0.0578341	0.283207	0.0215519	0.153415	0.0657023	32.3313	8.26632	1.97823	0.00725331	0.29224
ENSG00000159208	CIART	2.01039	0.473263	1.48983	0.283439	0.883913	0.712211	71.2232	23.8635	1.57921	0.00727982	0.292722
ENSG00000143324	XPR1	11.6794	4.94089	17.8053	4.13132	4.00917	2.54999	1796.88	623.509	1.52703	0.00735964	0.29534
ENSG00000168481	LGI3	1.20071	4.60328	1.56606	7.60652	4.5447	9.44572	198.877	589.044	-1.56587	0.0074077	0.295841
ENSG00000115461	IGFBP5	15.9583	17.1465	47.0617	7.78938	42.4042	14.8944	4092.41	1546.15	1.4044	0.0073969	0.295841
ENSG00000155974	GRIP1	0.367647	0.268186	1.14934	0.302403	0.741197	0.0773618	89.4011	25.6522	1.80084	0.00741625	0.295841
ENSG00000140832	MARVELD3	1.99241	0.282771	0.797583	0.521604	0.851897	0.508144	141.46	50.9816	1.46923	0.00743176	0.295873
ENSG00000158089	GALNT14	3.75383	0.532148	2.25146	0.33464	0.226867	0.531725	171.509	38.4871	2.15621	0.00746598	0.296647
ENSG00000105011	ASF1B	2.14788	1.18668	6.29914	1.4372	1.95618	0.857897	144.433	48.3394	1.57859	0.00763196	0.3009
ENSG00000117399	CDC20	1.67663	0.834751	8.46148	1.32483	1.1693	0.415658	138.863	31.6256	2.13291	0.00761228	0.3009
ENSG00000004838	ZMYND10	1.05806	0.212175	0.45419	0.444754	4.58737	0.676168	147.352	32.2044	2.19332	0.00763288	0.3009
ENSG00000248713	C4orf54	0.0116822	0	0.270798	0.0101018	0.0102726	0	17.7926	0.613953	4.79103	0.00760225	0.3009
ENSG00000165716	FAM69B	3.31169	10.0889	5.68421	7.87512	3.58267	7.89468	204.954	421.338	-1.03912	0.00770134	0.301306
ENSG00000239887	C1orf226	1.25821	0.608255	2.70452	0.838667	1.53283	0.841772	148.854	61.992	1.26307	0.00769369	0.301306
ENSG00000260220	CCDC187	0.0658644	0.00522514	0.00460564	0.0394298	0.605906	0	47.3927	3.12891	3.90253	0.00770312	0.301306
ENSG00000128710	HOXD10	0.503345	0.0225698	0	0	0.519589	0.0209785	16.5936	0.706422	4.58946	0.0076889	0.301306
ENSG00000189143	CLDN4	54.9038	17.005	78.4864	28.9712	29.8909	23.5049	4626.33	1968.64	1.23258	0.00773176	0.301839
ENSG00000132329	RAMP1	19.0967	6.89312	34.155	6.81171	11.335	11.3955	480.259	186.643	1.36357	0.00776329	0.302482
ENSG00000130226	DPP6	0.0911432	0.12533	0.0394536	0.23644	0.0457978	0.191381	14.4282	45.2448	-1.65767	0.00780462	0.302483
ENSG00000155324	GRAMD2B	17.9037	4.29432	7.22045	3.23754	4.23588	2.8511	893.619	316.021	1.49957	0.00779488	0.302483
ENSG00000138696	BMPR1B	2.65072	0.308025	0.695731	0.573032	0.84536	0.447355	159.436	50.5263	1.65501	0.00786249	0.303482
ENSG00000162849	KIF26B	1.12075	0.894306	2.74781	0.258201	1.44952	0.054894	461.557	104.791	2.14033	0.00786441	0.303482
ENSG00000056998	GYG2	1.25724	0.897655	2.81325	0.446016	1.62998	0.077256	125.55	31.2951	2.00723	0.00794408	0.305969
ENSG00000154016	GRAP	0.625728	3.1875	0.741177	0.950986	0.683619	1.63588	38.3905	108.109	-1.49118	0.00802646	0.307962
ENSG00000169213	RAB3B	0.0825629	0.00473045	0.041696	0.00396631	0.0161336	0	10.8658	0.673095	4.01059	0.00802387	0.307962
ENSG00000166689	PLEKHA7	3.35666	1.22213	3.81661	1.99841	3.66364	2.22052	717.468	360.23	0.99358	0.00805521	0.308358
ENSG00000129951	PLPPR3	0.730773	0.421161	1.21137	0.427471	2.5137	0.597501	73.5965	23.8855	1.62543	0.00808281	0.308358
ENSG00000137691	CFAP300	2.73756	0.550884	0.546267	0.307931	1.78098	0.597384	80.7857	23.227	1.80002	0.00807982	0.308358
ENSG00000152076	CCDC74B	0.367633	0.270818	0.620643	0.19301	0.80819	0.113275	48.5728	15.6037	1.64327	0.00821997	0.312526
ENSG00000138271	GPR87	7.07791	0	7.25412	0.270018	0.244075	0	149.141	2.76279	5.74094	0.00822315	0.312526
ENSG00000185567	AHNAK2	3.51515	0.812437	0.781732	0.341956	0.794834	0.240687	575.929	157.799	1.86823	0.00826313	0.313453
ENSG00000204618	RNF39	4.9673	0.963975	2.47622	1.40868	1.62037	0.870408	120.486	43.1101	1.47952	0.00833218	0.315478
ENSG00000163013	FBXO41	1.16194	0.424722	2.07238	0.680432	0.801874	0.514619	194.839	78.1913	1.31578	0.008399	0.31741
ENSG00000168484	SFTPC	1540.69	2546.63	571.308	4373.63	2832.75	9502.59	94990.4	315489	-1.73174	0.00845369	0.318877
ENSG00000072201	LNX1	3.99272	0.976372	1.48736	1.04111	2.60608	1.3613	278.956	116.561	1.25838	0.00852406	0.319732
ENSG00000186907	RTN4RL2	3.20851	2.11266	4.5096	0.469524	2.62606	0.425863	148.787	43.2668	1.78646	0.00851755	0.319732
ENSG00000135052	GOLM1	38.6213	21.1139	48.6961	8.25588	17.6967	4.86961	2678.64	873.357	1.61703	0.00855784	0.320152
ENSG00000171595	DNAI2	0.309961	0.0426222	0	0.12508	2.28952	0.0396171	44.6583	3.56168	3.63942	0.00856711	0.320152
ENSG00000110628	SLC22A18	2.73731	1.15436	6.48777	1.9741	2.94302	1.83785	389.786	159.088	1.29229	0.00863752	0.321588
ENSG00000167513	CDT1	0.706393	0.655661	2.13511	0.366499	1.16468	0.287788	80.5332	26.3329	1.61715	0.00870103	0.323353
ENSG00000166670	MMP10	0.201069	3.24872	0	0.231824	0.0294681	0.0321241	2.44218	37.2112	-3.94673	0.00878049	0.324629
ENSG00000082497	SERTAD4	1.28236	0.911314	2.93878	0.642965	1.2982	0.68178	181.825	73.6631	1.30495	0.0087838	0.324629
ENSG00000166987	MBD6	4.94595	5.58508	25.5156	3.3475	9.19387	4.29107	1349.15	449.894	1.58465	0.00875221	0.324629
ENSG00000158286	RNF207	1.5746	0.701231	2.19585	0.936089	1.22727	0.703247	198.31	92.8741	1.09323	0.00883218	0.325624
ENSG00000062038	CDH3	3.85449	2.01682	5.0497	0.653539	3.53065	0.0724492	467.266	103.067	2.18179	0.00884312	0.325624
ENSG00000124019	FAM124B	1.64711	2.98556	1.64852	5.46695	1.97506	2.9505	112.463	243.312	-1.11396	0.00887638	0.326251
ENSG00000053108	FSTL4	0.489923	0.198496	0.843	0.423645	0.938552	0.243206	92.172	35.1141	1.38882	0.00890113	0.326564
ENSG00000184811	TRARG1	0	0.642047	0.0148928	0	0	0.0471141	0.32271	14.9334	-5.39451	0.00897995	0.327909
ENSG00000095303	PTGS1	9.47128	3.55672	6.56598	4.79436	6.64671	3.42297	791.572	410.863	0.945517	0.00901933	0.327909
ENSG00000274276	CBSL	0.426694	0.0910459	0.0535009	0.0636156	0.931558	0.0846266	34.062	5.77342	2.56498	0.0089994	0.327909
ENSG00000196353	CPNE4	0.119165	0	0.699948	0.0158529	0.0241816	0.0615091	32.6592	2.99608	3.44254	0.00900867	0.327909
ENSG00000136944	LMX1B	0.0606311	0.0104216	0.220464	0.00873814	0.0355437	0	11.1237	0.673095	4.0497	0.00897086	0.327909
ENSG00000134115	CNTN6	1.22275	1.88068	0.54618	4.65773	1.84455	3.48606	121.696	337.608	-1.47226	0.00910294	0.32807
ENSG00000129514	FOXA1	2.47074	1.52582	11.1897	3.40305	7.24645	2.18408	501.658	170.674	1.55492	0.00913016	0.32807
ENSG00000070019	GUCY2C	0.380813	0.087275	0.589777	0.195139	0.434085	0.162243	35.3556	11.192	1.65186	0.00913579	0.32807
ENSG00000197261	C6orf141	1.22235	0.599313	0.965436	0.138621	1.85018	0.51864	71.5365	22.2614	1.69149	0.0090533	0.32807
ENSG00000124116	WFDC3	1.81271	0.252632	1.33608	0.508374	0.430811	0.140892	51.8761	13.0704	1.98031	0.00913798	0.32807
ENSG00000103460	TOX3	0.515242	0.181151	2.67186	0.658183	1.00912	0.0785766	127.213	27.8274	2.18821	0.00906447	0.32807
ENSG00000188095	MESP2	0.0330416	0.102229	2.61314	0.0857151	0.11622	0.0316737	29.6795	2.35959	3.6553	0.00911297	0.32807
ENSG00000185650	ZFP36L1	147.066	82.3647	120.352	55.8797	102.546	38.3499	11503.4	5490.91	1.06696	0.0091602	0.328281
ENSG00000169302	STK32A	2.56857	1.45887	2.89666	0.521472	1.43375	0.356844	328.96	111.443	1.56313	0.00921067	0.329503
ENSG00000204580	DDR1	10.779	8.5189	31.5854	10.5159	24.0738	9.8189	3651.96	1586.02	1.20326	0.00927435	0.331191
ENSG00000146013	GFRA3	0.317825	1.01313	43.0221	1.17427	3.55699	0.110788	576.208	28.2371	4.35069	0.00935954	0.333641
ENSG00000177453	NIM1K	0.586039	0.72191	0.443943	1.6892	0.75868	2.82449	39.0063	114.175	-1.5497	0.00946236	0.335767
ENSG00000121152	NCAPH	0.826726	0.518982	2.64668	0.46623	0.711173	0.275652	82.6567	24.9055	1.73152	0.00946927	0.335767
ENSG00000149972	CNTN5	1.37203	0.0066745	0	0	0.0682917	0.0062039	79.0064	0.706422	6.82245	0.00946924	0.335767
ENSG00000185760	KCNQ5	0.132302	0.0882877	0.933841	0.141322	0.273738	0.0969833	61.1195	14.8978	2.03453	0.00954599	0.337891
ENSG00000182107	TMEM30B	19.2249	5.51727	15.344	8.27217	12.2589	9.54919	1261.61	628.779	1.00434	0.00960451	0.338176
ENSG00000075702	WDR62	0.210147	0.16719	0.9497	0.207678	0.401261	0.0920899	92.3014	27.6091	1.7406	0.00957105	0.338176
ENSG00000144648	ACKR2	0.215918	0.211545	2.31608	0.140031	0.465172	0.310468	98.5559	21.77	2.18058	0.0096016	0.338176
ENSG00000114654	EFCC1	3.92088	10.6043	2.72773	16.6409	9.05927	12.8481	278.754	711.5	-1.3516	0.00972714	0.339892
ENSG00000243955	GSTA1	5.26114	0.178875	0.315335	1.89975	13.3707	0.720475	116.342	17.1874	2.75371	0.00973778	0.339892
ENSG00000151715	TMEM45B	6.87029	1.24446	4.88305	3.43325	6.57189	3.04106	334.256	140.792	1.24583	0.00975929	0.340053
ENSG00000137486	ARRB1	12.2214	15.5752	11.3394	25.0346	12.3112	28.5278	1259.78	2428.02	-0.946687	0.00980528	0.340997
ENSG00000091073	DTX2	5.22297	2.04856	5.51264	2.51585	3.13378	2.37456	421.384	210.822	0.998498	0.00983727	0.340997
ENSG00000158055	GRHL3	0.328957	0.0154208	0.27185	0.0905085	0.184079	0.0430006	18.6346	3.53587	2.371	0.00982382	0.340997
ENSG00000149043	SYT8	1.37765	0.219576	0.569243	0.617298	1.88322	0.420194	108.567	35.6323	1.60351	0.00989869	0.341947
ENSG00000149968	MMP3	1.03558	0.237336	0.706039	0	0.404726	0	26.4879	2.92894	3.2096	0.00989218	0.341947
ENSG00000174697	LEP	0	0.781681	0	0.0148957	0.0151477	0	0.312169	16.4162	-5.53169	0.00994715	0.343032
ENSG00000131409	LRRC4B	0.773932	2.66704	0.892287	2.38312	1.3777	1.7552	57.246	127.986	-1.15861	0.009999	0.343641
ENSG00000253910	PCDHGB2	1.51946	0.356725	0.34812	0.34183	1.08629	0.260522	84.8861	27.5613	1.62197	0.00998233	0.343641
ENSG00000152611	CAPSL	2.54339	0.214125	0	0.269304	3.97095	0.248785	44.5538	5.00785	3.15176	0.0100529	0.344902
ENSG00000007174	DNAH9	0.124904	0.0357821	0.0126159	0.0480032	1.23563	0.103104	140.499	19.1222	2.87745	0.0100778	0.344921
ENSG00000140795	MYLK3	0.0680577	0.0191424	0.0112486	0.0160502	0.320993	0.0118618	22.9684	2.69989	3.09296	0.0100903	0.344921
ENSG00000230062	ANKRD66	0.175527	0.0164567	0.0145055	0.0551932	0.996249	0.0458891	26.3917	2.61494	3.32574	0.0101157	0.344921
ENSG00000108984	MAP2K6	1.40076	0.423172	0.797447	0.55975	0.814945	0.467933	302.401	145.608	1.0531	0.0101998	0.346397
ENSG00000073282	TP63	1.73879	0.293438	0.0790311	0.26654	1.41084	0.0681872	145.02	28.2151	2.36153	0.0101841	0.346397
ENSG00000099985	OSM	39.0154	8.13363	19.7599	8.57892	6.34697	2.77829	829.568	248.287	1.7401	0.010292	0.348352
ENSG00000149269	PAK1	12.5327	4.68779	16.9616	6.24357	6.10244	4.75175	1351.14	595.281	1.18234	0.0103129	0.348474
ENSG00000143552	NUP210L	0.230091	0.0309516	0.52745	0.0865059	0.0703752	0.0383591	29.3796	5.52934	2.3974	0.0103798	0.350143
ENSG00000112984	KIF20A	0.773999	0.552624	2.92262	0.553452	0.916207	0.114147	110.017	29.1027	1.91855	0.0104672	0.35191
ENSG00000244094	SPRR2F	6.83428	0.446094	0.471845	0	0.152144	0	30.6057	1.83059	4.09405	0.0104511	0.35191
ENSG00000143554	SLC27A3	5.64361	18.5162	5.63936	8.65199	9.15821	18.1399	673.769	1493.41	-1.14802	0.0104894	0.35207
ENSG00000186479	RGS7BP	1.03593	0.763117	1.40643	0.52351	1.38415	0.425587	100.971	45.1805	1.1632	0.0105147	0.352108
ENSG00000101311	FERMT1	0.923439	0.385477	0.809461	0.475307	1.04403	0.11592	89.6739	31.5402	1.5057	0.0105321	0.352108
ENSG00000172361	CFAP53	1.49591	0.52519	0.462923	0.467875	3.07863	0.335611	56.187	14.8198	1.92416	0.0105606	0.352108
ENSG00000153132	CLGN	0.489844	0.213731	1.76402	0.146623	0.182237	0.162541	45.903	9.85283	2.22305	0.0105575	0.352108
ENSG00000160606	TLCD1	6.15645	0.834205	13.6848	1.47662	2.05481	3.44617	172.976	45.4796	1.92671	0.0105848	0.352329
ENSG00000163040	CCDC74A	1.58914	0.868817	1.06169	0.546354	2.79481	0.697438	100.97	39.171	1.36909	0.0106574	0.354159
ENSG00000130590	SAMD10	2.01741	0.866909	2.07406	1.24607	2.57652	1.03601	98.5622	46.5464	1.08045	0.0106762	0.354199
ENSG00000115361	ACADL	2.48664	3.64575	1.78392	3.83557	2.61211	8.27205	181.78	416.067	-1.19466	0.0107329	0.354909
ENSG00000197506	SLC28A3	1.83849	0.408013	1.94628	0.342104	0.552532	0	132.326	22.8852	2.5317	0.0107249	0.354909
ENSG00000136732	GYPC	16.5983	33.9652	11.1408	29.6412	23.1437	39.126	1168.8	2359.82	-1.01357	0.0108119	0.356933
ENSG00000128645	HOXD1	0.805396	0.430689	6.61634	0.593264	0.550838	0.629079	94.8819	19.6728	2.2693	0.0108416	0.357327
ENSG00000188763	FZD9	0.0503962	0.337833	3.61916	0.152525	1.17436	0.265704	68.2431	10.6517	2.68392	0.0109604	0.359476
ENSG00000105388	CEACAM5	25.9492	1.17853	237.263	2.20435	1.12855	10.0106	5337.73	270.45	4.30276	0.0109546	0.359476
ENSG00000115112	TFCP2L1	6.04093	2.65152	4.81715	3.52777	6.9814	3.52511	1007.47	548.048	0.878151	0.0109793	0.359509
ENSG00000172771	EFCAB12	0.204218	0.0624039	0.0962589	0.0915659	0.605245	0.0652545	42.5103	10.2894	2.04492	0.0110511	0.361273
ENSG00000231738	TSPAN19	0.230749	0.0148734	0.05244	0.0249417	0.405816	0.055299	16.9603	2.34129	2.85443	0.0111623	0.364315
ENSG00000196220	SRGAP3	0.376691	0.301799	0.608444	0.274584	0.646056	0.179056	186.01	86.145	1.11146	0.0113532	0.369065
ENSG00000158402	CDC25C	0.282388	0.127413	0.577578	0.0610466	0.201757	0.0338371	21.3558	4.47134	2.26784	0.0113536	0.369065
ENSG00000165215	CLDN3	22.6127	9.10892	31.6954	8.27729	12.6463	12.5449	514.004	229.779	1.16158	0.0114054	0.369847
ENSG00000129521	EGLN3	6.32442	0.908191	2.47431	1.41221	1.01371	0.859506	435.125	141.01	1.6247	0.0114891	0.370174
ENSG00000142621	FHAD1	0.46008	0.128111	0.246756	0.190963	0.691812	0.220516	107.921	41.6353	1.37298	0.0115725	0.372265
ENSG00000171873	ADRA1D	0.211158	1.39373	0.153561	0.876445	0.519906	0.647732	14.8724	49.0562	-1.71576	0.0116555	0.374334
ENSG00000066279	ASPM	0.232687	0.200908	1.23962	0.13102	0.171303	0.051873	107.826	25.1786	2.10028	0.011683	0.374621
ENSG00000173838	2020-03-10	0.215536	0.0493967	0.10885	0.0414174	0.463296	0.0803494	23.3526	5.07451	2.20675	0.0117509	0.376196
ENSG00000167371	PRRT2	0.470678	0.129444	0.442126	0.122101	0.979535	0.315834	42.818	12.8381	1.74049	0.0117945	0.376991
ENSG00000135917	SLC19A3	1.00498	1.42904	0.865119	4.14104	2.02855	5.13799	181.786	499.296	-1.45747	0.0118845	0.378667
ENSG00000225526	MKRN2OS	0.289896	0.0332192	1.22979	0.111412	0.0849726	0.0308771	17.6853	1.93433	3.17097	0.0118813	0.378667
ENSG00000006377	DLX6	0.0170812	0.0352322	0.791903	0	0.0300406	0	17.4376	0.732236	4.63065	0.0119672	0.380698
ENSG00000137441	FGFBP2	3.34627	0.680489	2.14217	21.2332	1.53343	10.6623	52.8909	245.372	-2.21532	0.0120475	0.382255
ENSG00000128422	KRT17	12.8367	3.66877	0.787061	0.764964	11.6685	0.360857	477.035	90.4303	2.40037	0.0120542	0.382255
ENSG00000105664	COMP	6.04141	0.901279	10.9492	0	2.73977	0.0728463	368.684	18.2026	4.343	0.0122489	0.387209
ENSG00000133962	CATSPERB	0.79457	0.0970402	0.17107	0.0904052	0.128708	0.0501101	37.1593	8.06635	2.20056	0.0122882	0.387841
ENSG00000171657	GPR82	1.26657	0	0.863522	0.334653	0.355782	0.033726	50.1664	7.4341	2.73637	0.0124877	0.392902
ENSG00000248485	PCP4L1	4.63362	0.469338	7.93537	3.04086	8.11272	3.01407	177.466	55.9834	1.66215	0.0125344	0.393755
ENSG00000188659	SAXO2	0.84971	0.204474	0.193105	0.330642	2.54044	0.325812	89.8232	21.5813	2.05638	0.0126042	0.395332
ENSG00000168703	WFDC12	0.076017	0.470384	0.0691024	0.723067	0.200535	1.38453	1.61422	12.0392	-2.8864	0.0126434	0.395944
ENSG00000187260	WDR86	0.874083	0.315509	1.66861	0.818822	2.33148	0.670316	118.776	43.9766	1.43122	0.012707	0.396642
ENSG00000185467	KPNA7	0.648899	0.070444	0.962426	0.0885971	0.180191	0.163693	18.6221	3.35469	2.47009	0.0127344	0.396642
ENSG00000105641	SLC5A5	0	0	0.410603	0	0.113483	0.0154639	11.5332	0.340304	4.99498	0.0127225	0.396642
ENSG00000101222	SPEF1	1.00994	0.157813	0.166923	0.105856	2.96028	0.469395	47.9899	8.50336	2.49975	0.0128161	0.39825
ENSG00000070756	PABPC1	198.77	122.948	323.851	114.698	159.885	112.247	19543.4	10019.1	0.96393	0.0128445	0.398517
ENSG00000108582	CPD	39.3664	14.4186	25.5934	8.31712	11.2109	7.88619	5752.1	2312.44	1.31469	0.0129247	0.400386
ENSG00000164619	BMPER	1.04897	2.40147	0.378715	1.42814	0.909318	1.71155	111.518	264.417	-1.24573	0.0129872	0.401705
ENSG00000111012	CYP27B1	0.496652	0.529866	3.50283	0.429464	0.662622	0.21342	96.6403	24.3098	1.99233	0.0131199	0.405047
ENSG00000049768	FOXP3	0.734468	0.0918141	2.67064	0.846811	1.4287	0.192016	77.1011	18.0342	2.08752	0.0131356	0.405047
ENSG00000065923	SLC9A7	1.75571	0.744865	3.39485	1.41157	1.65747	0.844326	411.595	181.418	1.18103	0.0131713	0.405528
ENSG00000065320	NTN1	1.96593	1.22791	1.64447	0.51079	3.55485	1.19442	275.596	112.817	1.29033	0.0132259	0.406586
ENSG00000111199	TRPV4	1.80235	1.00213	4.30258	1.4501	1.84673	0.721138	180.114	71.8804	1.32421	0.0132984	0.40819
ENSG00000115507	OTX1	0.158467	0.100572	0.299186	0	0.332289	0.0350553	23.0054	3.94986	2.57105	0.0133462	0.409033
ENSG00000167588	GPD1	5.19605	5.35876	1.86521	7.70979	5.76332	28.9658	308.42	1010.89	-1.71271	0.0134327	0.411058
ENSG00000130829	DUSP9	0.0212223	0	0.617341	0	0	0	10.6817	0	5.84508	0.0134594	0.411247
ENSG00000135951	TSGA10	0.774858	0.230674	0.726161	0.469715	0.660294	0.24504	96.05	42.0155	1.18796	0.0136126	0.414043
ENSG00000175793	SFN	87.745	24.6254	35.216	7.71869	15.1098	10.7386	1098.23	342.685	1.68051	0.0135958	0.414043
ENSG00000136449	MYCBPAP	0.0632989	0.0746069	0.361687	0.0938327	0.620228	0.0780149	41.0334	9.6754	2.08505	0.0135737	0.414043
ENSG00000104447	TRPS1	2.61257	1.36091	2.52487	0.823596	1.28202	0.688584	428.295	191.687	1.16033	0.0136525	0.414629
ENSG00000135218	CD36	13.6941	36.2537	4.45958	18.673	11.5038	18.0427	1944.37	4783.96	-1.29891	0.0137217	0.4161
ENSG00000171236	LRG1	24.4829	4.15008	8.581	4.24392	6.76292	6.79564	751.89	286.765	1.39039	0.0137431	0.416122
ENSG00000138741	TRPC3	0.324442	0.418251	0.135176	0.935169	0.142648	0.479473	15.8159	48.1329	-1.61465	0.0137971	0.417006
ENSG00000091651	ORC6	0.45118	0.324306	2.99527	0.295564	0.408765	0.36697	100.102	25.6236	1.96672	0.0138138	0.417006
ENSG00000054793	ATP9A	7.47306	5.52279	7.32774	4.93079	19.409	4.54265	1714.49	751.565	1.18994	0.0139256	0.419751
ENSG00000187583	PLEKHN1	1.18533	0.450377	1.22874	0.323678	0.493729	0.119606	49.6398	15.2559	1.7036	0.0139835	0.420867
ENSG00000198003	CCDC151	0.439487	0.294612	1.33836	0.304026	1.33329	0.442356	50.2613	16.8175	1.58179	0.0140628	0.42262
ENSG00000162782	TDRD5	0.456799	0	0.0629163	0.0239395	0.0121722	0	13.6408	0.613953	4.40238	0.0141384	0.424258
ENSG00000183644	C11orf88	0.39515	0.111143	0.0326551	0.0931891	1.40568	0.0860886	36.2385	5.74009	2.66103	0.014256	0.42715
ENSG00000169067	ACTBL2	0.442798	0.0434917	0.134173	0	0.074166	0	10.9627	0.732236	3.96873	0.0143116	0.428175
ENSG00000116299	KIAA1324	3.05969	0.418119	0.702541	1.04078	4.42292	1.1477	458.698	146.075	1.65027	0.0144059	0.42972
ENSG00000169860	P2RY1	1.57172	2.39538	2.18281	4.55296	1.96563	4.60364	232.561	469.662	-1.01411	0.0144376	0.430028
ENSG00000148655	LRMDA	1.15851	1.2874	0.816377	2.12782	0.829195	2.29857	110.844	225.863	-1.02844	0.0144636	0.430163
ENSG00000198478	SH3BGRL2	12.5221	8.35699	15.1582	7.41213	14.0396	9.03003	1169.75	695.325	0.750615	0.0145053	0.430767
ENSG00000188523	CFAP77	0.603675	0.141495	0	0.0949108	2.21987	0.0789112	36.5296	4.07941	3.16679	0.0145828	0.431793
ENSG00000189129	PLAC9	25.8933	41.4526	6.47835	26.3755	15.7504	56.5652	359.57	929.473	-1.37041	0.0148686	0.43812
ENSG00000110328	GALNT18	18.5982	51.6619	11.4137	20.8998	15.64	26.9058	997.757	2173.93	-1.1235	0.014859	0.43812
ENSG00000167608	TMC4	10.4859	6.60758	25.2905	8.38519	14.347	8.81601	924.834	439.299	1.07396	0.0148664	0.43812
ENSG00000164142	FAM160A1	1.52897	0.689871	0.901259	0.48547	1.55457	0.687033	118.426	55.3488	1.09885	0.0148837	0.43812
ENSG00000131097	HIGD1B	17.3113	27.0976	3.79421	23.9037	11.3718	32.2053	168.501	431.697	-1.35792	0.0149412	0.438759
ENSG00000071909	MYO3B	0.36481	0.059017	0.273104	0.0123709	0.00629006	0.013714	31.9711	4.22351	2.93265	0.014949	0.438759
ENSG00000160307	S100B	19.3258	0.335679	7.65591	5.80501	7.22694	2.49609	298.485	75.3596	1.98329	0.0150912	0.441002
ENSG00000198743	SLC5A3	0.809191	1.1442	8.66048	1.63709	2.70302	0.722026	849.109	244.374	1.79674	0.0151432	0.441879
ENSG00000183049	CAMK1D	5.44621	4.24377	6.61942	3.05823	5.94202	2.76505	950.776	531.524	0.839326	0.015207	0.442454
ENSG00000163347	CLDN1	19.0427	10.0019	19.9275	3.51861	14.3408	0.477941	1176.72	308.984	1.92953	0.0152013	0.442454
ENSG00000118997	DNAH7	0.124324	0.082629	0.0703209	0.0525583	0.386278	0.0291322	74.6458	21.1143	1.82524	0.0152936	0.443502
ENSG00000075218	GTSE1	0.472195	0.372397	2.34821	0.216167	0.232035	0.106505	78.0254	17.7671	2.13753	0.0153226	0.443502
ENSG00000215187	FAM166B	1.54583	0.221421	0.117101	0.259915	4.38001	0.576267	49.9598	8.74369	2.51511	0.0152888	0.443502
ENSG00000112972	HMGCS1	13.7698	21.1916	6.82243	21.2788	13.0229	22.508	952.434	1841.07	-0.950928	0.0155316	0.44801
ENSG00000113555	PCDH12	5.38166	20.0804	3.29022	6.61068	4.0183	5.63085	521.519	1328.31	-1.34875	0.0157777	0.449329
ENSG00000011638	TMEM159	13.7955	5.81927	25.1232	8.7229	14.541	11.127	824.035	395.668	1.05825	0.0156645	0.449329
ENSG00000163808	KIF15	0.56851	0.241422	1.09439	0.308455	0.343079	0.106857	63.8837	20.9148	1.60861	0.0157028	0.449329
ENSG00000072571	HMMR	0.718454	0.324166	1.70079	0.440059	0.473826	0.157829	68.6169	21.869	1.6474	0.0157391	0.449329
ENSG00000186329	TMEM212	0.130003	0	0	0.0187361	0.724012	0.0207702	13.9924	0.647281	4.40899	0.0157338	0.449329
ENSG00000196218	RYR1	0.712199	0.281622	2.07978	0.61266	1.01566	0.629652	366.304	146.606	1.32049	0.0159838	0.452158
ENSG00000156968	MPV17L	2.46084	0.141556	1.0071	0.593449	1.2587	0.817648	171.148	56.2205	1.60368	0.0161027	0.452158
ENSG00000036828	CASR	0.00981478	0.00506106	0.26766	0.0381916	0.125143	0	29.1255	3.12891	3.19676	0.0160831	0.452158
ENSG00000163218	PGLYRP4	0.907554	0.0267421	0.683572	0.089689	0	0	21.7837	1.59402	3.74814	0.0160864	0.452158
ENSG00000128408	RIBC2	0.421968	0.334755	1.00322	0.14034	0.998994	0.217807	26.5131	7.57819	1.81974	0.0161454	0.452725
ENSG00000087085	ACHE	0.731938	0.803039	5.13884	1.18504	2.24584	0.597136	185.025	58.932	1.65009	0.0162001	0.453079
ENSG00000101842	VSIG1	0.719026	0.161204	3.0976	0.473074	0.13745	0.164822	89.8026	18.1487	2.30283	0.0162031	0.453079
ENSG00000118193	KIF14	0.234778	0.166986	0.596111	0.0840072	0.199332	0.0620851	45.1753	13.7285	1.7247	0.0162531	0.453217
ENSG00000275004	ZNF280B	0.154412	0.0212329	0.458529	0.106818	0.199145	0.0690755	28.0055	6.79809	2.02967	0.0162344	0.453217
ENSG00000185291	IL3RA	8.54414	15.1717	7.48508	13.1082	11.1184	28.2701	279.734	582.703	-1.05846	0.0164161	0.457128
ENSG00000120332	TNN	0.0823467	0.339701	0.0641626	0.21362	0.0827555	0.202982	6.91862	22.8233	-1.71996	0.0164917	0.457964
ENSG00000131400	NAPSA	340.022	126.436	363.47	218.455	508.82	264.881	26159.9	13158	0.99141	0.0164859	0.457964
ENSG00000104738	MCM4	4.37646	2.89282	9.3315	2.389	2.86031	1.64409	696.169	291.014	1.2585	0.0165301	0.458398
ENSG00000151651	ADAM8	17.0331	4.70302	16.2568	9.2508	9.51564	6.99429	1232.95	603.38	1.03055	0.0166718	0.460808
ENSG00000184374	COLEC10	0.493883	0.072764	0.320685	3.02	0.0310209	2.43481	8.5093	55.6248	-2.71583	0.0167964	0.461943
ENSG00000145431	PDGFC	10.6387	4.54082	7.49742	3.23349	6.91906	5.42224	844.424	444.757	0.925068	0.0168505	0.461943
ENSG00000111424	VDR	6.22981	3.83351	10.2314	4.08516	4.93946	2.31908	731.702	350.036	1.06367	0.0168613	0.461943
ENSG00000164265	SCGB3A2	90.0961	54.2018	65.6601	94.0675	582.047	63.7238	4779.33	1373.24	1.7992	0.01676	0.461943
ENSG00000105929	ATP6V0A4	0.0142855	0.176793	3.40234	0.29647	0.678339	0.150634	101.762	15.5042	2.71312	0.0168366	0.461943
ENSG00000183778	B3GALT5	0.0164574	0.00848634	0.0860221	0.014231	0.0687404	0	14.7735	1.96014	2.9015	0.0168648	0.461943
ENSG00000107165	TYRP1	0.724407	3.91411	0.672829	1.92008	1.17707	1.01143	58.0318	154.319	-1.40923	0.0169899	0.464043
ENSG00000131941	RHPN2	2.75926	1.93505	2.94304	1.49521	2.85768	1.0345	247.796	129.247	0.939822	0.0170541	0.464043
ENSG00000106392	C1GALT1	7.61607	3.45631	13.2634	4.77125	4.40724	3.0245	1189.28	529.204	1.168	0.0169767	0.464043
ENSG00000146670	CDCA5	1.24581	0.990703	3.31559	0.700877	1.22748	0.215825	136.915	45.1129	1.60297	0.0170646	0.464043
ENSG00000153002	CPB1	0	0.0426147	0.178421	0	0.908381	0.0495126	37.3484	3.16599	3.57299	0.0170169	0.464043
ENSG00000130433	CACNG6	0.222554	0	0	0	1.67744	0.0914314	21.2151	1.02091	4.383	0.0170799	0.464043
ENSG00000185015	CA13	6.41566	2.12125	2.90635	1.17959	2.00547	1.34851	377.328	154.874	1.28499	0.0171397	0.464411
ENSG00000007908	SELE	13.7743	0.424047	5.50144	3.27771	3.19756	2.77136	620.902	178.842	1.79474	0.0171219	0.464411
ENSG00000103723	AP3B2	0.194049	0.0200125	0.076439	0.0615258	0.153572	0.024802	23.2738	5.83631	1.97836	0.0171948	0.465279
ENSG00000149256	TENM4	0.707103	0.476241	0.754287	0.0967081	0.548822	0.100291	197.809	66.2482	1.58131	0.0172265	0.46551
ENSG00000117245	KIF17	1.43659	1.54953	0.658946	3.54438	1.64571	4.13133	100.772	248.487	-1.30266	0.017313	0.466492
ENSG00000104450	SPAG1	2.93692	1.59858	5.28657	1.8644	2.12139	1.32946	315.112	145.981	1.10976	0.0173325	0.466492
ENSG00000113368	LMNB1	12.227	6.02061	12.7363	3.81409	4.71991	2.20736	649.821	263.623	1.30179	0.0173253	0.466492
ENSG00000221968	FADS3	5.05399	15.8301	4.90965	8.5865	7.04145	8.92548	643.819	1262.35	-0.971092	0.0175185	0.469613
ENSG00000116711	PLA2G4A	7.82777	3.36018	19.6335	3.43757	3.24344	4.26257	531.938	191.612	1.47307	0.0175028	0.469613
ENSG00000131477	RAMP2	52.7037	44.2453	14.6481	82.672	11.5523	94.845	545.833	1534.08	-1.49125	0.0175797	0.469821
ENSG00000187492	CDHR4	0.223509	0.0384179	0	0.128848	1.81801	0.0357092	38.9107	3.86866	3.32134	0.0175585	0.469821
ENSG00000148773	MKI67	0.58881	0.706874	2.64698	0.258555	0.683614	0.0881926	302.472	81.3111	1.89674	0.0176609	0.470294
ENSG00000157510	AFAP1L1	8.03646	41.3118	3.596	8.58947	7.49477	8.20615	544.131	1653.04	-1.60302	0.0177385	0.471737
ENSG00000277893	SRD5A2	1.30552	0	0	0	0.267496	0.0121502	44.0572	0.340304	6.92633	0.0178708	0.474627
ENSG00000196437	ZNF569	0.540273	1.65946	0.726016	1.77733	1.04312	1.30602	69.8034	143.354	-1.03649	0.0179968	0.476713
ENSG00000081479	LRP2	0.579712	0.306405	1.62705	0.567082	0.901649	0.472354	304.563	131.866	1.20702	0.0180577	0.477125
ENSG00000135525	MAP7	8.84726	2.74398	4.87662	3.52591	4.6983	3.18296	604.667	310.269	0.962004	0.01818	0.479672
ENSG00000100450	GZMH	9.2923	2.10832	8.616	62.7819	3.5953	25.1788	123.228	516.148	-2.06707	0.0182866	0.479927
ENSG00000213145	CRIP1	2.63154	1.88264	1.37927	5.04308	1.14659	6.49964	77.2279	201.034	-1.38235	0.0182382	0.479927
ENSG00000120756	PLS1	5.88687	2.78885	7.52634	5.39842	11.4883	3.92567	794.378	386.413	1.03935	0.0182807	0.479927
ENSG00000042980	ADAM28	4.13923	1.33198	2.48557	1.14406	1.16895	0.410677	439.16	162.66	1.43269	0.018328	0.479927
ENSG00000069188	SDK2	0.436507	0.308841	0.498309	0.232618	0.723047	0.0632518	115.954	42.2947	1.4565	0.018236	0.479927
ENSG00000118596	SLC16A7	0.909673	1.40501	3.93868	0.633763	2.61584	0.173576	614.625	182.172	1.75508	0.0183395	0.479927
ENSG00000134460	IL2RA	16.0145	4.12516	4.55523	1.6844	2.62817	0.655681	553.836	154.354	1.84362	0.0183568	0.479927
ENSG00000134690	CDCA8	0.572668	0.467558	5.09732	0.51583	0.566518	0.548959	92.7855	22.798	2.02518	0.0183836	0.480004
ENSG00000185499	MUC1	31.8733	15.3022	30.6998	20.0447	41.6241	23.5139	2961.69	1673.05	0.8239	0.0184262	0.48049
ENSG00000261371	PECAM1	86.3539	220.44	40.9716	82.2684	53.2004	108.931	8440.4	19246	-1.18918	0.018451	0.480515
ENSG00000133640	LRRIQ1	0.2278	0.145106	0.042634	0.0405554	0.889634	0.0449584	61.4665	12.2194	2.33772	0.0185076	0.481365
ENSG00000157570	TSPAN18	7.39551	18.6382	3.08318	7.55777	4.04133	8.18591	513.686	1216.35	-1.24371	0.0186759	0.482
ENSG00000167207	NOD2	1.60291	0.671847	2.01813	0.807919	0.904495	0.698429	187.428	90.2113	1.05399	0.0185564	0.482
ENSG00000104237	RP1	0.358733	0.0755844	0.115714	0.186789	0.722481	0.114627	110.157	34.6964	1.66417	0.0185861	0.482
ENSG00000168779	SHOX2	0.233551	0.060216	0.169845	0.100978	0.821486	0.156717	37.2369	9.66462	1.94541	0.018673	0.482
ENSG00000154639	CXADR	6.08353	2.38231	7.26134	4.53626	6.56672	3.76945	801.733	430.35	0.897096	0.0187215	0.482558
ENSG00000165521	EML5	0.21423	0.0386642	0.0973715	0.0787306	0.183672	0.0462061	32.8289	10.8442	1.58863	0.0189729	0.488098
ENSG00000248383	PCDHAC1	0.195161	0.0437548	0.300824	0.190772	0.544687	0.0650717	43.539	12.5344	1.78667	0.0191047	0.490549
ENSG00000146267	FAXC	0.343517	0.187557	1.91036	0.532935	0.621908	0.135592	202.091	60.1599	1.74621	0.0192239	0.49298
ENSG00000078401	EDN1	44.0183	40.1367	18.3344	64.6753	13.5564	74.8359	929.928	2200.78	-1.24308	0.0193785	0.495566
ENSG00000172889	EGFL7	10.315	48.4541	17.6207	34.2416	33.6844	57.4917	947.962	2156.64	-1.18566	0.0193889	0.495566
ENSG00000117115	PADI2	2.924	0.802119	2.43429	1.35361	1.39382	1.07588	243.472	116.527	1.06129	0.0193987	0.495566
ENSG00000106541	AGR2	61.688	5.50986	48.0201	17.2616	46.9795	35.4924	2686.18	998.848	1.42712	0.0194383	0.495948
ENSG00000149564	ESAM	37.305	94.1124	17.3868	43.6508	29.7346	46.0496	1485.52	3234.27	-1.12247	0.0194932	0.496089
ENSG00000072274	TFRC	31.8282	53.8864	28.8312	45.7825	24.9336	42.0745	4067.88	6736.47	-0.727728	0.0194702	0.496089
ENSG00000176842	IRX5	5.63248	0.662038	7.2096	4.02891	5.24423	1.98503	310.063	114.45	1.4358	0.0196421	0.499246
ENSG00000120262	CCDC170	1.1089	0.336361	1.13651	0.846079	4.08207	0.979621	206.618	70.6	1.54855	0.0196876	0.499772
ENSG00000163362	INAVA	1.98082	0.954078	7.53896	2.06107	1.94281	1.0746	373.886	133.399	1.48607	0.0197184	0.499923
ENSG00000177034	MTX3	1.71852	1.36569	3.30699	1.52463	2.98963	1.31219	382.472	200.538	0.931673	0.0197812	0.500578
ENSG00000173599	PC	1.68977	2.54226	13.2463	1.63308	3.27769	1.71509	650.507	210.378	1.62895	0.0197941	0.500578
ENSG00000078549	ADCYAP1R1	0.0948544	1.41401	0.0470325	0.28335	0.333639	0.289314	19.5767	81.7885	-2.05809	0.0199421	0.501177
ENSG00000137878	GCOM1	1.37247	1.09107	0.285914	2.1214	0.231317	2.72448	117.309	368.556	-1.65322	0.0200399	0.501177
ENSG00000068001	HYAL2	39.4051	47.6305	17.5804	44.532	22.0784	67.6944	2165.36	4378.07	-1.01577	0.0199074	0.501177
ENSG00000130707	ASS1	32.0642	8.14754	31.3776	14.8654	16.7814	15.9609	1474.41	716.294	1.04124	0.0199707	0.501177
ENSG00000213462	ERV3-1	9.22209	3.97172	7.89148	1.81543	2.43508	1.74089	538.804	207.489	1.37717	0.0199946	0.501177
ENSG00000254221	PCDHGB1	0.555436	0.0636476	0.0897622	0.0960591	0.26049	0.05916	26.0488	6.2949	2.04056	0.0199077	0.501177
ENSG00000123500	COL10A1	14.9753	2.37236	18.3426	0.0400498	4.08629	0.0295986	860.097	56.1531	3.93803	0.0200421	0.501177
ENSG00000215182	MUC5AC	0.0945421	0	0	0	0.00890732	0.00323671	10.8766	0.340304	4.9048	0.0201924	0.504203
ENSG00000226321	CROCC2	0.17739	0.0914723	0.0537514	0.161914	1.38655	0.037788	58.2733	10.4888	2.47136	0.0202653	0.504875
ENSG00000159216	RUNX1	8.67773	6.92081	13.7789	3.3103	6.69599	2.06692	2735.87	1154.13	1.24534	0.0203254	0.505745
ENSG00000168631	MUCL3	0.362894	0.577425	0.706895	1.2821	0.574395	2.55436	56.2949	151.126	-1.42403	0.020387	0.506528
ENSG00000008226	DLEC1	0.572316	0.189459	0.231225	0.232172	1.28612	0.298016	104.992	36.1576	1.53803	0.0204073	0.506528
ENSG00000124243	BCAS4	1.18091	0.504781	2.00573	0.940534	1.55763	0.886248	216.784	106.538	1.02376	0.020704	0.512627
ENSG00000006432	MAP3K9	0.656388	0.505253	1.79005	0.62106	0.924342	0.37844	251.582	112.309	1.16338	0.0207676	0.513571
ENSG00000153822	KCNJ16	0.0836307	0.0670829	0.00844706	0.00803523	0.661862	0.00890759	28.8034	3.21011	3.18513	0.0208624	0.515282
ENSG00000043039	BARX2	0.032193	0.149405	1.97537	0.139189	0.198161	0.0154301	48.6462	6.70513	2.85955	0.0209352	0.516445
ENSG00000181234	TMEM132C	0.166724	1.11764	0.216512	0.453104	0.429352	0.627871	24.2231	65.5404	-1.43	0.0210348	0.516999
ENSG00000114646	CSPG5	0.310354	0.65406	4.36678	0.408387	0.901781	0.413919	146.775	38.8415	1.9194	0.021014	0.516999
ENSG00000150051	MKX	0.100437	0.162771	3.4303	0.161292	0.744397	0.536408	105.776	21.2899	2.31357	0.021034	0.516999
ENSG00000145247	OCIAD2	17.0357	4.7471	37.7231	9.76602	7.78222	9.32517	935.75	356.673	1.39124	0.0211928	0.520246
ENSG00000141441	GAREM1	1.77487	1.25241	1.82572	0.962592	1.814	0.641751	246.924	130.278	0.923229	0.0213222	0.522784
ENSG00000111665	CDCA3	0.281383	0.268698	1.60104	0.180235	0.238268	0.129872	72.2394	19.7164	1.87573	0.0213491	0.522805
ENSG00000243649	CFB	2.09857	1.5077	2.20776	0.397597	1.8039	0.293842	183.986	66.2186	1.4773	0.0213935	0.523255
ENSG00000088325	TPX2	1.96105	1.5337	5.08061	0.847878	1.25022	0.328975	180.126	58.8817	1.61455	0.0215126	0.524714
ENSG00000270765	GAS2L2	0.312744	0.100793	0.12438	0.219729	2.1657	0.20611	47.2722	9.56463	2.30304	0.0215575	0.524714
ENSG00000131094	C1QL1	0.409435	0.281504	1.61283	0.157354	0.440042	0.0436094	19.2146	3.76492	2.36149	0.0214914	0.524714
ENSG00000166123	GPT2	1.14971	1.58732	8.03231	1.27479	1.8263	0.462174	421.489	127.281	1.72779	0.0216313	0.525872
ENSG00000168209	DDIT4	59.4571	23.7954	60.8407	33.2196	59.2057	43.7963	2226.06	1250.18	0.832267	0.0216732	0.526257
ENSG00000206053	JPT2	12.8996	9.11115	36.8748	10.2464	11.2346	6.64471	1752.86	747.076	1.23037	0.0217104	0.526524
ENSG00000185633	NDUFA4L2	9.40596	47.7662	6.16467	11.9279	10.745	10.9084	444.958	1193.78	-1.42361	0.0217698	0.527326
ENSG00000170312	CDK1	2.9524	2.08657	6.36222	1.63288	2.04268	1.04874	269.027	112.947	1.25258	0.0218568	0.528798
ENSG00000125869	LAMP5	5.30854	3.68951	7.00245	0.773381	3.27269	1.07859	191.754	68.1868	1.49464	0.0220545	0.532939
ENSG00000233822	HIST1H2BN	0.408746	0.0665598	0.205339	0.13952	0.340511	0.123734	31.5051	10.885	1.52474	0.022127	0.533908
ENSG00000171241	SHCBP1	1.10982	0.885685	4.45586	0.696915	0.650612	0.240639	167.027	48.989	1.77017	0.0221684	0.533908
ENSG00000127564	PKMYT1	0.234061	0.313807	1.89366	0.222637	0.339603	0.0897483	74.844	18.995	1.98033	0.0221742	0.533908
ENSG00000168386	FILIP1L	17.6051	52.7399	16.2759	18.9775	14.8315	28.3758	1732.73	3560.37	-1.03892	0.0225712	0.535926
ENSG00000108679	LGALS3BP	109.608	106.021	269.789	79.7269	157.395	84.0967	11592.9	5827.74	0.992256	0.0225732	0.535926
ENSG00000164574	GALNT10	26.4537	12.2431	13.5468	7.19788	13.1882	4.82634	3364.03	1534.84	1.13215	0.0223755	0.535926
ENSG00000087258	GNAO1	0.288179	0.212921	0.449642	0.174807	0.35931	0.0659696	90.5528	37.4464	1.27527	0.0225559	0.535926
ENSG00000103888	CEMIP	2.07947	1.20384	7.24505	2.05217	2.00531	0.318644	520.299	164.159	1.66377	0.0224332	0.535926
ENSG00000049089	COL9A2	1.18748	0.835656	20.04	2.12616	2.03928	2.58466	591.232	140.941	2.06837	0.022361	0.535926
ENSG00000086696	HSD17B2	2.23932	0.0572588	0.0280389	0.128025	0.119341	0.20106	137.347	22.2328	2.62535	0.0225033	0.535926
ENSG00000137473	TTC29	0.353621	0.0911734	0.0160727	0.0305782	0.684099	0.033898	21.1582	3.12515	2.77276	0.0225779	0.535926
ENSG00000090776	EFNB1	16.7282	25.7039	11.6999	18.6157	12.4745	27.4532	816.809	1433.28	-0.811301	0.0226414	0.536167
ENSG00000174371	EXO1	0.227684	0.308193	1.24184	0.0984413	0.387912	0.0545644	46.3374	11.5055	2.01877	0.0226389	0.536167
ENSG00000125848	FLRT3	12.8156	23.273	13.4041	57.6082	20.7619	22.0782	1469.31	3219.97	-1.13194	0.0227055	0.537052
ENSG00000138135	CH25H	32.6364	24.7933	22.8702	20.4559	108.434	18.7912	1665.57	650.623	1.35624	0.02274	0.537118
ENSG00000164778	EN2	0.138823	0.0894815	0.694077	0.0600216	0.106814	0.0166345	19.2244	3.3988	2.50633	0.0227724	0.537118
ENSG00000166391	MOGAT2	0.455478	0	0.012939	0.0123081	0	0	11.6828	0.306977	5.00818	0.0228152	0.537118
ENSG00000213937	CLDN9	0.402334	0.0592761	0.653102	0.0745512	0.581226	0.275484	20.2177	5.05621	2.00144	0.0228713	0.537809
ENSG00000197093	GAL3ST4	5.1161	3.41618	7.58306	2.09952	3.09579	1.06398	323.319	134.685	1.26405	0.0229312	0.538589
ENSG00000163071	SPATA18	5.19858	2.38556	1.31149	1.12383	6.1021	1.2687	375.511	142.261	1.4011	0.0230588	0.540233
ENSG00000162383	SLC1A7	0.326872	0.606793	6.00221	1.02697	1.46591	0.407341	253.974	66.5027	1.93264	0.0230818	0.540233
ENSG00000140519	RHCG	0.0451962	0.512725	0.041085	0.371279	0.039743	0.0216625	1.97976	14.2275	-2.84577	0.0231332	0.540805
ENSG00000168672	FAM84B	9.71348	5.52038	31.1178	7.76782	7.63078	6.38521	1578.1	640.639	1.30054	0.0232349	0.542552
ENSG00000144891	AGTR1	2.3545	5.36305	1.01627	3.8376	2.97901	4.4978	133.078	287.09	-1.1089	0.0233443	0.542631
ENSG00000156219	ART3	0.0539169	0.0556052	0.0163375	0.124328	0.0632153	0.706357	2.63639	17.5066	-2.73239	0.0234424	0.542882
ENSG00000150045	KLRF1	1.96377	0.530427	0.977579	7.80323	1.15122	6.54383	31.0731	112.958	-1.86465	0.0234954	0.542882
ENSG00000187266	EPOR	2.75528	12.8857	4.81798	7.24689	4.9298	5.88769	231.976	482.768	-1.0565	0.023546	0.542882
ENSG00000165512	ZNF22	6.69731	11.9563	5.39532	11.3829	8.06216	10.9362	309.818	526.878	-0.765881	0.0235247	0.542882
ENSG00000105131	EPHX3	4.72117	1.94163	2.86992	0.85156	1.85927	1.16613	115.829	48.5277	1.25707	0.0234975	0.542882
ENSG00000132429	POPDC3	0.156601	0.258407	0.0854136	1.13749	0.192788	0.420328	4.92832	20.5862	-2.06792	0.0236985	0.545056
ENSG00000214491	SEC14L6	2.79629	4.26309	2.79455	5.91736	3.19199	4.89487	179.518	308.134	-0.779752	0.0237216	0.545056
ENSG00000113296	THBS4	2.8785	1.38536	2.198	0.420379	1.02372	0.2698	169.275	57.5942	1.55771	0.0236989	0.545056
ENSG00000198542	ITGBL1	5.31498	1.26948	8.33588	5.65212	12.301	3.42101	965.5	384.782	1.32677	0.0238768	0.547586
ENSG00000106852	LHX6	0.942939	19.5233	1.39756	1.58644	2.21712	0.4716	157.86	747.503	-2.24302	0.0240436	0.550565
ENSG00000092421	SEMA6A	3.19409	9.11148	1.09005	3.50131	3.02621	4.7835	482.623	1148.49	-1.25071	0.0241322	0.551818
ENSG00000165905	LARGE2	1.1915	0.838713	5.69069	1.47188	2.84387	1.41412	182.563	69.9147	1.3842	0.0241532	0.551818
ENSG00000128039	SRD5A3	11.5427	5.09982	20.3676	4.57568	3.5865	4.48471	945.431	377.146	1.32585	0.0241966	0.552183
ENSG00000182195	LDOC1	16.2534	13.3747	22.5696	7.11953	16.0179	8.46498	456.369	240.989	0.922209	0.0243852	0.554597
ENSG00000123892	RAB38	20.3482	2.69575	19.0091	8.20657	4.87992	5.58959	390.519	145.588	1.42224	0.0244358	0.555122
ENSG00000142197	DOP1B	2.45961	1.24476	5.34357	2.12687	2.30053	1.38215	549.777	258.669	1.08726	0.0244676	0.55516
ENSG00000213085	CFAP45	1.52613	0.856398	0.346828	0.232884	3.71022	0.430279	88.3139	24.0362	1.88212	0.0245379	0.555556
ENSG00000140057	AK7	0.753938	0.43737	0.621106	0.468585	1.92676	0.451703	99.5007	40.9133	1.28299	0.0247232	0.558495
ENSG00000154645	CHODL	1.39045	0.0785748	0.831105	0.164705	0.133993	0.328656	43.9026	10.6597	2.03792	0.0247193	0.558495
ENSG00000169174	PCSK9	1.80962	2.40299	0.795628	4.5308	2.67293	5.56691	158.423	375.205	-1.24395	0.0248428	0.560069
ENSG00000213064	SFT2D2	3.57543	3.40582	10.9963	3.8363	6.3527	2.59194	1414.82	664.94	1.08935	0.0248486	0.560069
ENSG00000167920	TMEM99	4.71405	2.03212	5.53229	1.79013	2.30293	2.24749	178.614	86.391	1.04785	0.0251232	0.565535
ENSG00000167900	TK1	6.04644	6.13783	22.216	3.72289	5.23339	1.63869	375.625	128.955	1.54306	0.0251474	0.565535
ENSG00000167600	CYP2S1	2.62383	2.26204	6.16788	2.03844	4.86686	2.5152	236.543	118.036	1.00377	0.025215	0.566422
ENSG00000148734	NPFFR1	0.739635	0.0476747	0.216114	0.205578	0.284547	0.145601	66.674	21.441	1.62922	0.0253137	0.567627
ENSG00000138400	MDH1B	0.700897	0.0781453	0.0516601	0.114663	1.68241	0.290542	45.6322	9.05818	2.33277	0.0253251	0.567627
ENSG00000162129	CLPB	1.36048	0.948426	1.90034	0.918194	1.32972	0.772498	343.782	197.641	0.798754	0.025366	0.56791
ENSG00000198873	GRK5	13.3228	23.0012	4.64393	23.1283	14.8828	23.59	1385.62	2940.83	-1.08571	0.0254299	0.568598
ENSG00000186174	BCL9L	3.13416	2.88412	3.44753	1.58134	4.95289	1.34847	727.723	366.804	0.989026	0.0254533	0.568598
ENSG00000171004	HS6ST2	16.2418	0.959592	2.75159	0.122215	1.69852	0	623.68	32.607	4.25856	0.0255116	0.569268
ENSG00000203780	FANK1	1.42757	0.269317	0.458947	0.46668	1.13285	0.433903	61.5692	23.856	1.36364	0.0256107	0.570845
ENSG00000103740	ACSBG1	0.0930585	0.0221475	0.00650721	0.0123799	0.27067	0.020586	18.361	2.73322	2.75656	0.0256427	0.570927
ENSG00000173083	HPSE	4.26781	2.17498	4.75308	2.13658	2.39218	1.67473	324.679	170.298	0.930667	0.0256967	0.571496
ENSG00000260287	TBC1D3G	0.0855882	0.205959	0.129672	0.814107	0.100349	0.328179	3.92723	16.7767	-2.09864	0.0259137	0.57481
ENSG00000177508	IRX3	27.8477	5.03012	15.2329	16.0303	20.9284	7.7019	1122.8	504.526	1.15352	0.0259315	0.57481
ENSG00000163501	IHH	0.582434	0.540605	0.476509	3.50031	0.51216	0.977061	19.1522	61.1705	-1.67923	0.0260974	0.575546
ENSG00000196839	ADA	4.99895	19.152	2.70401	4.75138	1.90727	3.7029	165.158	474.433	-1.52253	0.0260865	0.575546
ENSG00000115884	SDC1	46.1965	22.8835	162.287	44.8216	49.1823	38.2987	5581.79	2296.35	1.28134	0.0261078	0.575546
ENSG00000198796	ALPK2	0.156169	0.0450966	0.102214	0.00540169	0.0439444	0.00598814	17.1812	3.21011	2.44483	0.0260376	0.575546
ENSG00000116981	NT5C1A	0.0532188	0.164656	0.725669	0	1.16994	0	12.9999	1.09835	3.61762	0.026028	0.575546
ENSG00000105374	NKG7	21.1079	5.45847	20.3907	122.591	11.1921	56.8365	296.868	1041.68	-1.81128	0.0262542	0.577887
ENSG00000166428	PLD4	2.4994	0.487666	3.30829	1.77429	1.55185	0.78515	309.412	128.107	1.27027	0.0263006	0.577895
ENSG00000121361	KCNJ8	4.64855	20.962	6.01516	12.1616	14.6405	25.1451	378.759	872.177	-1.20283	0.026769	0.586904
ENSG00000171812	COL8A2	2.68705	1.97756	11.3645	3.04351	3.60527	2.07999	496.876	199.829	1.31388	0.0268695	0.588466
ENSG00000196581	AJAP1	0.142475	0.181221	0.0518059	0.279254	0.137812	0.373307	24.8241	62.3257	-1.33034	0.0269073	0.588653
ENSG00000197057	DTHD1	0.440433	0.205483	0.266914	0.317376	1.52151	0.211099	75.4538	24.8468	1.60172	0.0270071	0.589553
ENSG00000035499	DEPDC1B	0.603682	0.271383	1.37896	0.24093	0.204171	0.0296764	50.1532	12.4302	2.01267	0.0269853	0.589553
ENSG00000179299	NSUN7	1.80677	0.706787	2.95636	1.26065	1.96131	1.38558	191.581	95.5281	1.00284	0.0271354	0.59171
ENSG00000203734	ECT2L	0.229333	0.0394191	0.0115818	0.066103	0.985908	0.0977061	34.1836	5.66265	2.59275	0.0271716	0.591859
ENSG00000147174	GCNA	0.504366	1.71149	0.384538	0.759719	0.414898	0.655044	28.4484	68.2136	-1.26047	0.0273075	0.592577
ENSG00000166046	TCP11L2	1.70685	3.07588	0.898289	1.84881	1.5246	3.16903	163.197	319.844	-0.970705	0.0273315	0.592577
ENSG00000163219	ARHGAP25	7.30472	12.5483	7.47521	11.4651	5.53017	9.67477	667.246	1106.75	-0.730128	0.027352	0.592577
ENSG00000134057	CCNB1	4.42195	1.92392	7.89288	2.2106	1.74168	1.67789	216.669	89.5931	1.27357	0.0274073	0.593137
ENSG00000096696	DSP	3.38548	3.69616	5.08323	1.28204	5.6717	1.4492	860.004	390.907	1.13823	0.0274682	0.593176
ENSG00000197653	DNAH10	0.0986585	0.0835785	0.0352331	0.0914055	0.904728	0.0607975	104.643	23.7555	2.13964	0.027501	0.593249
ENSG00000163815	CLEC3B	40.9993	15.6156	5.37967	66.4338	5.43835	111.211	345.029	1286.83	-1.89948	0.0275386	0.593422
ENSG00000160201	U2AF1	0.795265	1.41069	0.597619	3.09915	2.28442	5.48376	246.229	669.163	-1.44206	0.027606	0.594239
ENSG00000186105	LRRC70	0.550101	4.18741	0.214313	0.475683	0.875317	1.25554	22.2218	80.21	-1.84906	0.0277062	0.594545
ENSG00000108622	ICAM2	6.04937	9.64858	3.61653	7.41451	4.95206	8.6026	285.661	501.554	-0.81226	0.0277021	0.594545
ENSG00000240694	PNMA2	5.81846	2.18899	4.24288	3.46075	4.095	2.146	475.91	262.078	0.859691	0.027709	0.594545
ENSG00000169679	BUB1	0.742275	0.251815	1.58035	0.548959	0.446595	0.252785	100.655	38.2946	1.39094	0.0279016	0.59804
ENSG00000134020	PEBP4	34.7096	26.7445	13.4188	62.4813	10.9925	49.3352	473.46	1109.64	-1.22931	0.0280649	0.598913
ENSG00000164237	CMBL	25.6638	4.58792	12.4702	9.54805	9.28874	7.59444	949.873	435.258	1.12531	0.0280896	0.598913
ENSG00000146955	RAB19	0.709086	0.182822	1.07431	0.357676	0.779413	0.0566441	15.3968	3.58749	2.08701	0.0280913	0.598913
ENSG00000140481	CCDC33	0.125046	0.0257923	0.00757809	0	0.27123	0.0239737	17.198	2.11927	3.04249	0.0280327	0.598913
ENSG00000181409	AATK	4.45753	5.5341	1.88408	7.73357	3.66172	6.15999	375.234	728.748	-0.958055	0.0282098	0.599534
ENSG00000187672	ERC2	0.727782	0.0995655	0.0877608	0.0770604	0.0848941	0.0213567	43.0436	9.46417	2.18405	0.0282083	0.599534
ENSG00000186973	FAM183A	2.30621	0.0720735	0.825868	0.362586	10.3856	2.07675	68.6668	12.7574	2.42846	0.0283018	0.600219
ENSG00000116329	OPRD1	0.025217	0.0130033	0.154732	0.0054514	0.0166308	0.00604325	11.0697	1.37952	3.02227	0.0282887	0.600219
ENSG00000146648	EGFR	7.00127	9.16634	21.6125	4.78064	12.0607	4.13599	3068.87	1364.35	1.16963	0.0283846	0.600331
ENSG00000145386	CCNA2	1.60022	1.04231	3.7132	0.801111	0.92575	0.605512	105.194	41.2898	1.35024	0.0285373	0.600331
ENSG00000185046	ANKS1B	0.485036	0.109939	0.193809	0.156706	0.196852	0.0510939	58.3247	21.1626	1.45748	0.0285099	0.600331
ENSG00000189431	RASSF10	0.326002	0.024015	2.15911	0.342307	1.14667	0.491079	55.3679	13.0714	2.07873	0.0283687	0.600331
ENSG00000168748	CA7	0.0949192	0	1.23675	0.054719	0	0.0303298	14.9415	0.954258	3.93994	0.0284003	0.600331
ENSG00000080618	CPB2	2.67943	2.47992	2.87289	17.9416	9.27354	29.4719	153.215	515.614	-1.7504	0.0286221	0.600889
ENSG00000157368	IL34	3.45617	4.29904	4.10112	7.11792	3.20156	9.05407	144.768	275.452	-0.928506	0.0286622	0.600889
ENSG00000157992	KRTCAP3	28.1339	3.94082	20.4217	8.31506	5.87098	9.1373	460.136	180.863	1.34637	0.0286449	0.600889
ENSG00000158764	ITLN2	5.36557	0.742762	1.76769	21.5793	3.57822	18.8822	105.597	406.204	-1.9443	0.0289053	0.605356
ENSG00000129968	ABHD17A	18.7613	22.8919	15.6851	30.1146	14.2951	26.089	1803.08	2925.95	-0.698569	0.0290997	0.608793
ENSG00000166828	SCNN1G	22.124	3.30903	2.38223	3.9947	5.87921	3.10793	642.123	220.026	1.5448	0.0291733	0.609065
ENSG00000138028	CGREF1	0.102103	0.2106	0.96793	0.0630643	0.371959	0.0838932	35.0957	8.70236	2.02238	0.0291583	0.609065
ENSG00000133805	AMPD3	3.91136	1.02858	5.05349	2.77477	2.44039	1.47982	466.857	216.259	1.10908	0.0292924	0.609439
ENSG00000164611	PTTG1	7.08246	1.23749	7.07673	2.50541	1.74999	2.52492	192.979	76.0289	1.34215	0.0292915	0.609439
ENSG00000165164	CFAP47	0.030885	0.0265435	0.00467928	0.0133534	0.321376	0	24.6167	2.75152	3.17096	0.0293001	0.609439
ENSG00000066056	TIE1	12.5677	36.2333	6.57629	14.8096	11.4305	14.4602	1233.28	2642.2	-1.09919	0.0293703	0.610009
ENSG00000178343	SHISA3	1.73362	1.51047	137.051	8.7361	7.54339	3.29504	1737.93	160.833	3.43349	0.0296295	0.614759
ENSG00000076716	GPC4	19.2181	14.528	17.092	9.29511	19.4478	8.20924	1666.5	957.389	0.799848	0.0297783	0.615307
ENSG00000138160	KIF11	1.1516	0.812606	3.25073	0.702305	0.671546	0.348606	148.591	54.5742	1.44547	0.0297263	0.615307
ENSG00000197520	FAM177B	1.72009	0.0700245	0.226315	0.19571	0.179118	0.195262	33.3395	7.23086	2.19576	0.0297347	0.615307
ENSG00000150873	C2orf50	0.28073	0.12408	0.0546845	0	0.881637	0.0576659	21.5466	3.21762	2.76608	0.0297617	0.615307
ENSG00000047936	ROS1	14.5933	10.8043	18.8217	10.3106	14.4613	8.12319	2266.42	1384.1	0.71149	0.0299401	0.616962
ENSG00000196247	ZNF107	1.82613	1.32341	3.79113	1.33725	1.65643	0.922574	313.911	154.642	1.02149	0.0299874	0.616962
ENSG00000164114	MAP9	3.01317	1.55033	1.30001	1.12735	2.97716	0.886294	389.092	190.212	1.03282	0.0299851	0.616962
ENSG00000151882	CCL28	1.79709	0.537206	2.87659	1.3738	1.83218	1.16094	177.356	83.7442	1.08053	0.0299007	0.616962
ENSG00000118307	CASC1	0.758368	0.226402	0.10885	0.120801	1.0705	0.172177	34.4686	9.23887	1.90435	0.0300119	0.616962
ENSG00000244752	CRYBB2	0	0.411453	0	0.862472	0.175412	0.446184	0.936506	9.18349	-3.25907	0.0300443	0.616998
ENSG00000130768	SMPDL3B	3.44212	2.27558	7.42139	2.38499	3.37605	2.45356	229.1	114.459	1.00129	0.0300863	0.617229
ENSG00000088836	SLC4A11	1.8978	0.125822	0.702393	0.527485	0.309924	0.220907	76.2111	22.8942	1.72786	0.0302212	0.618679
ENSG00000152766	ANKRD22	14.4478	0.841426	7.75657	5.70283	7.62277	4.49707	311.479	115.302	1.43196	0.0303986	0.620472
ENSG00000187323	DCC	0.152207	1.18653	0.240099	0.57679	0.440893	0.343308	66.0728	167.056	-1.33582	0.0305031	0.620598
ENSG00000179921	GPBAR1	0.48146	0.767374	0.815649	1.64639	0.577321	1.90904	30.4062	70.1227	-1.20579	0.0304357	0.620598
ENSG00000174501	ANKRD36C	0.652759	0.616508	1.34916	0.344613	0.725052	0.289814	140.891	64.6303	1.12669	0.0305283	0.620598
ENSG00000112333	NR2E1	0	0.0162759	0.387347	0	0.0277551	0	9.33751	0.366118	4.68996	0.0304747	0.620598
ENSG00000169744	LDB2	15.6933	18.2078	4.76486	19.9359	11.4813	30.1175	1075.09	2297.7	-1.09584	0.0306401	0.622242
ENSG00000154133	ROBO4	10.362	20.3707	3.33525	12.3211	7.5354	12.2937	899.833	1906.48	-1.08325	0.0307749	0.622464
ENSG00000104413	ESRP1	9.01523	2.59234	14.4679	7.02234	6.81169	4.66853	889.941	419.583	1.08423	0.0307694	0.622464
ENSG00000211448	DIO2	1.83956	0.39727	0.585996	0.00679789	0.124431	0.0226077	115.152	19.2677	2.58427	0.030683	0.622464
ENSG00000086159	AQP6	0.241212	0.011846	0.0417659	0	0	0	8.74588	0.366118	4.58966	0.0307402	0.622464
ENSG00000137976	DNASE2B	0.67854	0.699787	2.97524	6.73032	0.526473	8.60886	37.1798	142.653	-1.93982	0.0308536	0.622828
ENSG00000248329	APELA	0.0572158	0	0.12136	0.0494756	0.368957	0	10.1917	0.92093	3.411	0.0308549	0.622828
ENSG00000177483	RBM44	0.214265	0.522304	0.141655	0.387402	0.291183	0.532158	23.5871	52.5564	-1.15352	0.0309647	0.624418
ENSG00000014216	CAPN1	36.9017	16.37	34.2044	17.8602	18.3612	15.6868	4071.94	2271.88	0.841774	0.031054	0.624965
ENSG00000143228	NUF2	0.438082	0.307223	1.81594	0.287901	0.323588	0.218371	52.2195	16.4805	1.6647	0.0310475	0.624965
ENSG00000137834	SMAD6	4.18302	0.943689	3.40852	17.693	2.28685	13.586	509.718	1662.67	-1.70589	0.0311203	0.625272
ENSG00000116194	ANGPTL1	3.16812	7.19526	0.975718	3.84732	3.98851	8.39727	166.762	398.632	-1.25705	0.0311625	0.625272
ENSG00000174460	ZCCHC12	0.343286	0.299569	0.504097	0.182674	1.25391	0.177194	28.249	8.86524	1.68024	0.0311557	0.625272
ENSG00000094804	CDC6	0.678504	0.601347	2.39968	0.339195	0.438156	0.284556	117.747	41.0231	1.52312	0.0312176	0.625753
ENSG00000277758	FO681492.1	0.447766	0.626711	0.891603	2.60893	0.778106	1.94175	70.5094	172.401	-1.28998	0.0313043	0.626865
ENSG00000188064	WNT7B	3.58075	1.37129	2.7143	2.22896	3.15896	1.77774	287.747	163.688	0.812441	0.0314473	0.628477
ENSG00000137843	PAK6	0.419701	0.103506	0.281996	0.165682	0.4172	0.209908	43.535	18.6411	1.2201	0.0315939	0.630153
ENSG00000029534	ANK1	1.42413	0.196956	0.178564	0.141549	0.0911637	0.0993802	110.204	28.4892	1.95121	0.0316823	0.631291
ENSG00000104918	RETN	8.3838	3.97264	4.32554	28.8026	7.37225	23.3499	62.9244	175.865	-1.48416	0.0319734	0.633337
ENSG00000164935	DCSTAMP	0.445348	0.612391	0.520507	1.3937	0.503504	1.32139	24.5968	55.7013	-1.18093	0.0319263	0.633337
ENSG00000132622	HSPA12B	12.6203	12.7262	4.09603	17.8326	6.31327	17.2774	437.272	908.286	-1.05513	0.0320229	0.633337
ENSG00000126368	NR1D1	1.82775	1.92882	3.40028	0.532957	2.61641	0.835296	131.031	55.0732	1.25475	0.0319053	0.633337
ENSG00000159164	SV2A	0.696114	0.843861	2.0538	0.422416	1.13833	0.199017	113.026	42.5941	1.41096	0.032037	0.633337
ENSG00000159588	CCDC17	1.25875	0.383965	0.290093	0.337272	2.36965	0.577827	78.4635	26.0123	1.5939	0.032136	0.634047
ENSG00000166908	PIP4K2C	8.08963	7.23791	45.7947	10.0219	17.8703	11.7091	1426.43	575.88	1.30856	0.0321719	0.634134
ENSG00000162344	FGF19	0	0.0248296	0.875429	0	0	0	12.9084	0.366118	5.1564	0.0322483	0.635016
ENSG00000119782	FKBP1B	1.58086	1.63036	0.702562	2.97701	1.17388	3.06449	34.9371	77.5267	-1.15353	0.0323078	0.635565
ENSG00000008323	PLEKHG6	0.91274	0.47066	4.63886	1.1241	0.693165	0.318164	160.304	49.105	1.70505	0.0323706	0.636178
ENSG00000175318	GRAMD2A	2.36267	2.35137	1.7719	6.88506	3.69813	8.74234	235.38	540.278	-1.19876	0.0324528	0.63655
ENSG00000157240	FZD1	14.9166	7.87943	13.552	10.2282	15.8473	9.8706	1859.4	1173.91	0.663396	0.0324422	0.63655
ENSG00000171094	ALK	2.13662	0	0.13094	0.0968768	0.035184	0.0306841	102.155	5.65889	4.16757	0.0325607	0.638044
ENSG00000178075	GRAMD1C	1.00275	1.59398	0.877266	1.8711	1.14695	1.59723	142.527	238.364	-0.742096	0.0326781	0.639049
ENSG00000123485	HJURP	0.539639	0.365724	1.63985	0.253317	0.271159	0.0443398	56.4255	15.2742	1.88734	0.0327073	0.639049
ENSG00000139567	ACVRL1	39.182	36.5633	14.8975	48.5983	13.2185	58.2558	2043.85	4355.62	-1.0917	0.0330268	0.643415
ENSG00000162522	KIAA1522	6.39996	6.57999	13.2247	5.97826	12.2456	4.75273	1145.55	622.229	0.880718	0.0330136	0.643415
ENSG00000115339	GALNT3	8.9891	3.66933	15.9086	7.14251	5.8814	3.69986	869.113	409.768	1.08431	0.0331297	0.644794
ENSG00000183019	MCEMP1	29.8893	11.5077	7.08064	48.1369	19.026	112.208	643.128	1973.77	-1.61791	0.0333294	0.646179
ENSG00000089723	OTUB2	0.471084	0.285785	0.831276	0.299526	0.511714	0.22579	46.48	20.7819	1.16145	0.0332447	0.646179
ENSG00000134443	GRP	4.29215	0.428376	0.377586	0.598629	2.86114	0.995431	38.6183	10.371	1.89397	0.0333293	0.646179
ENSG00000170498	KISS1	6.97984	0.171391	0.15107	0.215557	0.219203	0.637226	31.4021	4.3756	2.84056	0.0332791	0.646179
ENSG00000135318	NT5E	18.546	7.35851	11.6253	4.43914	4.60565	2.00581	949.938	377.044	1.33319	0.0334074	0.646266
ENSG00000114270	COL7A1	1.12814	0.543315	0.367639	0.156451	0.767412	0.132628	150.982	55.5308	1.44557	0.0334011	0.646266
ENSG00000124602	UNC5CL	0.507225	0.968717	3.56915	0.324894	1.12332	0.342158	98.2589	30.9112	1.67253	0.0334303	0.646266
ENSG00000148344	PTGES	4.59871	5.09521	10.6205	2.39133	5.81986	1.78716	240.371	105.952	1.18357	0.0335179	0.647337
ENSG00000140961	OSGIN1	2.02621	3.31886	1.02156	3.4453	1.00316	1.73013	84.4594	177.101	-1.07011	0.0336126	0.648542
ENSG00000050344	NFE2L3	9.92748	4.11821	21.1747	6.10265	3.42603	3.54874	884.054	352.554	1.32607	0.0337395	0.649756
ENSG00000132872	SYT4	0.0265554	0.136935	0.168979	0.0803704	1.17924	0.012728	36.757	6.15032	2.58493	0.0337481	0.649756
ENSG00000181019	NQO1	36.952	7.65543	10.0065	7.06068	5.65174	5.31072	1031.59	392.688	1.39323	0.0338602	0.650822
ENSG00000159147	DONSON	3.35401	2.43862	6.98204	1.43564	1.88757	1.46289	258.759	112.981	1.19641	0.0339411	0.651132
ENSG00000176945	MUC20	0.72099	0.400382	2.72246	0.899212	1.15827	0.531646	117.822	46.8867	1.32737	0.0339267	0.651132
ENSG00000242715	CCDC169	0.0333333	0.0137508	0.0666627	0.0115296	0.0703474	0	9.07084	1.34619	2.7571	0.0339897	0.651442
ENSG00000118004	COLEC11	0.699833	1.83717	1.15668	1.88883	0.335669	1.32139	36.6967	84.4923	-1.20402	0.0340765	0.651814
ENSG00000145861	C1QTNF2	0.902978	3.42298	0.953951	2.11033	2.03872	2.71375	56.6676	119.965	-1.07899	0.0341064	0.651814
ENSG00000133101	CCNA1	1.301	0.354421	0.223143	0.275943	0.971343	0.0941235	36.0898	10.4776	1.78469	0.0340626	0.651814
ENSG00000156299	TIAM1	4.02727	2.31402	2.7951	2.08395	5.3289	2.51854	674.811	384.103	0.813177	0.0342056	0.653091
ENSG00000104147	OIP5	0.762631	0.393255	1.25653	0.247298	0.712528	0.274146	20.3455	6.81263	1.58543	0.0344557	0.656619
ENSG00000163263	C1orf189	1.21784	0	0.41515	0	3.88203	0.583712	12.861	1.36122	3.24681	0.0344499	0.656619
ENSG00000011347	SYT7	0.930261	1.47991	5.65861	0.641819	1.29665	0.607147	282.868	97.8898	1.53211	0.0345822	0.658405
ENSG00000100191	SLC5A4	1.24792	2.93314	0.290196	2.1331	1.12287	1.61355	32.5503	81.7102	-1.32878	0.0346942	0.658888
ENSG00000165304	MELK	1.0878	0.866003	3.72989	0.495076	0.587358	0.0548825	100.544	26.3394	1.93442	0.0347059	0.658888
ENSG00000183273	CCDC60	0.154133	0.0529866	0	0.0296182	0.7078	0	17.8669	1.71231	3.39305	0.0346984	0.658888
ENSG00000251287	ALG1L2	0.589525	0.0405323	0.464447	0.0679698	0.311037	0.188373	12.3298	2.68159	2.19635	0.0348004	0.660058
ENSG00000183807	FAM162B	11.885	20.2331	4.96257	20.456	9.4009	11.829	163.863	327.859	-1.00121	0.0349752	0.661043
ENSG00000013364	MVP	54.6633	25.3282	84.4085	31.8303	30.9514	31.2396	6291.66	3271.15	0.943618	0.0349377	0.661043
ENSG00000172426	RSPH9	0.985246	0.392583	0.264617	0.348529	1.96902	0.321973	51.0322	16.8541	1.59977	0.0349838	0.661043
ENSG00000179008	C14orf39	0.442189	0.0175398	0	0	0.0149552	0	9.54222	0.366118	4.71569	0.0349485	0.661043
ENSG00000082556	OPRK1	0.051336	0	0.354665	0.0621477	0.0993124	0.0196843	17.4718	2.82945	2.60063	0.0351058	0.662724
ENSG00000169442	CD52	67.1674	20.5992	55.4445	165.362	36.4574	283.035	896.222	2642.4	-1.56	0.0352121	0.662864
ENSG00000188706	ZDHHC9	42.7438	19.202	20.7353	6.63634	14.1295	6.8398	2451.93	1032.42	1.24801	0.0351812	0.662864
ENSG00000154783	FGD5	8.38601	17.5149	5.87622	9.77574	8.03351	11.828	1087.3	1907.7	-0.811006	0.0352637	0.663216
ENSG00000111796	KLRB1	5.32986	2.55955	2.92182	16.3244	4.47211	14.1965	111.02	288.641	-1.37936	0.03542	0.663671
ENSG00000249751	ECSCR	5.06597	7.1031	0.93138	6.10336	2.75292	8.18466	54.5732	133.411	-1.29175	0.035419	0.663671
ENSG00000183688	RFLNB	10.9008	32.8539	7.43934	13.9844	8.55547	10.0752	586.851	1241.83	-1.08133	0.0353694	0.663671
ENSG00000185386	MAPK11	7.73674	14.2401	4.94103	9.28655	6.55271	10.0216	311.485	543.398	-0.802806	0.0353969	0.663671
ENSG00000037897	METTL1	3.03445	3.66263	14.7525	2.5462	3.81471	2.28396	341.171	134.133	1.34742	0.0355381	0.665263
ENSG00000172318	B3GALT1	0.0231304	0.679859	0.0315397	0.030002	0.0813584	0.0776048	4.17548	24.1718	-2.52153	0.0357293	0.665617
ENSG00000139364	TMEM132B	0.0300137	0.278582	0.0136418	0.0973254	0.0428876	0.0107892	8.18905	36.5907	-2.15675	0.0357247	0.665617
ENSG00000107317	PTGDS	2.10792	2.55493	2.17299	6.74609	3.17212	5.93697	121.753	248.929	-1.03205	0.0357556	0.665617
ENSG00000123933	MXD4	10.968	26.9701	14.5533	20.4481	17.6451	24.4684	1835.88	3057.36	-0.735681	0.0356377	0.665617
ENSG00000083307	GRHL2	4.39419	1.4237	5.78847	3.32897	3.29124	2.14341	492.021	251.821	0.96535	0.0355957	0.665617
ENSG00000166246	C16orf71	0.291023	0.182691	0.276053	0.196946	0.734349	0.0727759	36.5132	12.6931	1.52498	0.0356679	0.665617
ENSG00000166145	SPINT1	31.5024	10.2235	33.9893	21.1713	24.6739	18.5111	1924.45	1065.17	0.853128	0.0358204	0.666206
ENSG00000159231	CBR3	6.55151	1.24738	3.48172	2.26609	2.21578	1.78746	86.2846	37.3409	1.2039	0.035898	0.667032
ENSG00000150048	CLEC1A	5.00084	5.94351	1.38575	6.67134	3.00792	7.16396	179.397	377.694	-1.07495	0.0359979	0.667664
ENSG00000101955	SRPX	12.512	20.3342	5.094	10.6655	6.83085	18.4458	292.591	592.028	-1.01707	0.0359984	0.667664
ENSG00000277494	GPIHBP1	21.5826	127.879	4.01306	40.9199	47.4236	53.1827	1004.09	3052.47	-1.60401	0.0361258	0.668595
ENSG00000164187	LMBRD2	2.71444	2.18616	3.9684	2.25044	3.59885	1.75706	521.73	314.289	0.731365	0.0362461	0.669786
ENSG00000170571	EMB	26.3804	9.44251	33.4855	13.654	7.7062	5.38207	2140.54	902.141	1.24642	0.0362854	0.669897
ENSG00000126091	ST3GAL3	0.0665515	0.0249583	0.0632478	0.0340058	0.0744821	0.017399	23.9731	8.96147	1.41471	0.0363873	0.671162
ENSG00000168994	PXDC1	40.1962	66.9713	18.4864	42.2537	27.5148	50.1054	1285.03	2375.29	-0.886356	0.0368075	0.675178
ENSG00000134755	DSC2	3.58336	1.86723	4.46608	1.23128	1.57965	1.7175	725.002	362.612	0.999734	0.0367783	0.675178
ENSG00000139116	KIF21A	1.50821	1.15306	3.02788	1.39481	1.84853	0.541464	389.229	188.337	1.0471	0.0366994	0.675178
ENSG00000158716	DUSP23	187.165	27.1017	89.7117	49.7701	34.9134	52.4354	1550.01	642.828	1.26953	0.0367325	0.675178
ENSG00000183048	SLC25A10	0.876618	0.370899	2.45194	0.641408	0.711552	0.560216	63.8084	24.836	1.35906	0.0368401	0.675178
ENSG00000188033	ZNF490	0.239436	0.03704	0.380899	0.0931701	0.284238	0.172142	26.8234	8.96571	1.5771	0.0367776	0.675178
ENSG00000139266	2020-03-09	3.83929	4.39945	20.9671	4.7827	7.64463	4.44179	783.157	328.793	1.2522	0.0370059	0.676982
ENSG00000115963	RND3	33.4563	80.4189	11.295	31.8927	21.9818	35.2767	1445.23	3196.3	-1.14512	0.0370924	0.677947
ENSG00000111206	FOXM1	0.721533	0.905354	4.08845	0.426348	0.475857	0.276664	156.041	47.48	1.71825	0.0371946	0.679198
ENSG00000105173	CCNE1	0.901026	0.524186	1.42812	0.339622	0.528208	0.287907	43.9057	17.6972	1.31407	0.0372713	0.679365
ENSG00000176244	ACBD7	0.19664	0.446153	2.18078	0.13603	0.62249	0.0753994	27.0794	5.93581	2.20223	0.0374401	0.681206
ENSG00000101977	MCF2	0.896198	0	0.0535972	0.0713778	0	0.0113039	28.5937	2.48914	3.49984	0.0374287	0.681206
ENSG00000145632	PLK2	10.7003	38.3688	10.4233	14.9796	11.0716	12.6024	925.006	1894.85	-1.03442	0.0377018	0.684762
ENSG00000147144	CCDC120	1.41799	1.45097	2.85999	0.957942	2.15286	0.987607	206.079	108.843	0.922637	0.0377036	0.684762
ENSG00000164929	BAALC	3.15422	3.16179	0.870911	4.46089	1.39978	4.15396	130.661	283.644	-1.11987	0.0379849	0.688005
ENSG00000010810	FYN	13.355	23.8654	7.08181	15.4597	8.97552	14.1585	1313.48	2388.45	-0.862721	0.0381003	0.688854
ENSG00000106012	IQCE	3.17519	2.28829	4.21364	2.19983	3.1397	2.09639	586.216	366.617	0.677272	0.0382476	0.690896
ENSG00000182704	TSKU	11.4803	6.28023	7.37653	3.21864	6.77189	4.34732	637.97	344.67	0.888652	0.0383218	0.691616
ENSG00000125498	KIR2DL1	0.105579	0	0.0959755	1.33901	0.0309468	0.404832	2.3453	17.5906	-2.91838	0.0384853	0.691764
ENSG00000198648	STK39	9.91828	6.65233	11.5885	4.4382	6.30637	4.45463	711.788	397.828	0.839574	0.0383936	0.691764
ENSG00000010626	LRRC23	3.51087	1.27325	4.85742	2.43541	4.80053	3.10663	242.345	125.421	0.94955	0.0385365	0.691764
ENSG00000244694	PTCHD4	1.10384	0.246459	0.206893	0.206647	0.360243	0.109087	52.1274	17.538	1.56994	0.0385134	0.691764
ENSG00000074211	PPP2R2C	0.185745	0.0528445	0.0698687	0	0.0732186	0.00613983	18.2258	3.26925	2.50606	0.0384794	0.691764
ENSG00000187944	C2orf66	0.0352985	2.07502	0.0320877	0.0305233	0.186237	0.0676742	2.55072	21.8563	-3.08544	0.0386378	0.692965
ENSG00000089685	BIRC5	1.14275	1.06705	4.42192	0.734439	0.719702	0.192441	144.469	45.8376	1.65713	0.038753	0.694412
ENSG00000175538	KCNE3	1.73039	5.89899	3.16054	2.99259	1.97245	4.23902	152.072	290.935	-0.934875	0.0389168	0.69625
ENSG00000105699	LSR	20.1832	10.6681	34.1051	20.0908	33.293	17.4109	1538.92	846.409	0.862349	0.0389249	0.69625
ENSG00000146250	PRSS35	0.265592	2.11657	0.373125	1.0648	0.679409	0.486048	19.3805	53.9222	-1.47091	0.0389679	0.6964
ENSG00000166448	TMEM130	0.909661	2.97079	5.92624	1.11435	7.52133	0.726667	403.417	135.205	1.57821	0.0390849	0.69787
ENSG00000263639	MSMB	4.31072	0	1.63275	0	0	0.459139	17.6207	1.36122	3.69585	0.0391743	0.698845
ENSG00000169035	KLK7	0.0726128	2.12179	1.29815	7.2836	0.851355	0.324831	32.5917	142.712	-2.12947	0.0392866	0.699019
ENSG00000198589	LRBA	3.60404	2.6518	3.89352	3.29387	7.43314	2.0885	1498.63	806.409	0.894057	0.0392588	0.699019
ENSG00000073605	GSDMB	1.38678	0.802561	4.35327	1.13016	1.35983	1.22416	252.632	112.33	1.16904	0.0393103	0.699019
ENSG00000147378	FATE1	0	2.72051	0.0499574	0.0950436	0.386604	0.526811	2.82006	21.5907	-2.91748	0.0396271	0.699283
ENSG00000168356	SCN11A	0.0305923	0.978059	0.0417144	0.0859748	0.174858	0.0806459	11.4727	53.1327	-2.20447	0.0397209	0.699283
ENSG00000182853	VMO1	3.81505	2.42124	6.5359	22.2679	5.67726	20.0437	77.5565	216.451	-1.48092	0.039662	0.699283
ENSG00000159640	ACE	7.88092	14.4468	5.90922	9.61011	2.97267	8.6821	844.949	1650.25	-0.965875	0.0396237	0.699283
ENSG00000070761	CFAP20	15.5779	19.9798	8.63634	18.2109	11.5607	22.6134	511.988	870.191	-0.765457	0.0396565	0.699283
ENSG00000095015	MAP3K1	5.35228	2.43315	7.43348	4.0076	4.02167	2.93496	781.468	435.927	0.841661	0.0395136	0.699283
ENSG00000052344	PRSS8	18.4569	7.56951	39.1961	17.534	25.2829	16.5482	1504.27	755.47	0.993442	0.0397424	0.699283
ENSG00000104951	IL4I1	4.45929	2.91581	10.9282	3.51813	3.09253	1.01358	285.41	115.021	1.31079	0.0396323	0.699283
ENSG00000219438	FAM19A5	2.52512	0.593601	2.44733	1.0757	0.555112	0.444958	105.687	40.4247	1.38334	0.0397553	0.699283
ENSG00000162433	AK4	1.18946	1.10644	2.7703	0.262179	0.676787	0.163952	211.722	69.9831	1.59929	0.0396812	0.699283
ENSG00000167178	ISLR2	0.115876	0.0896282	0.658347	0.10855	0.152842	0.0833088	34.0823	10.3485	1.71926	0.0396315	0.699283
ENSG00000103168	TAF1C	5.09166	13.8359	4.41725	7.12494	6.27939	7.55419	530.584	958.279	-0.852554	0.0399678	0.700575
ENSG00000127990	SGCE	2.14112	3.75301	1.87199	3.36874	2.74851	3.64794	850.908	1355.3	-0.671404	0.0399681	0.700575
ENSG00000182578	CSF1R	22.863	17.9054	38.9363	18.5338	24.2883	14.0884	2672.09	1568.33	0.768745	0.0399534	0.700575
ENSG00000132744	ACY3	1.04231	0	2.05978	0.431059	0.27895	0.26065	26.4857	5.41857	2.27386	0.0401079	0.701891
ENSG00000283654	LMLN2	0.602086	0	0	0.0157768	0	0	11.7151	0.306977	5.01292	0.0401131	0.701891
ENSG00000186377	CYP4X1	14.0809	2.78991	2.87949	4.11865	8.43762	4.16685	389.957	170.05	1.19668	0.040175	0.702364
ENSG00000119888	EPCAM	56.8785	21.2737	110.978	46.4739	57.2549	46.1388	3416.99	1728.69	0.98296	0.0403067	0.703444
ENSG00000171115	GIMAP8	7.42047	9.22115	6.5023	16.1207	10.0044	17.2365	603.255	1073.49	-0.831525	0.0407386	0.708104
ENSG00000103356	EARS2	3.40319	2.31156	5.00028	2.32935	3.42654	2.53296	408.467	247.7	0.721749	0.0406124	0.708104
ENSG00000141655	TNFRSF11A	0.811783	0.675163	1.71988	0.718947	1.01319	0.41419	192.225	98.0579	0.971192	0.0406942	0.708104
ENSG00000163116	STPG2	0.131232	0.0208218	0.100942	0.0349166	0.0710144	0.00967685	10.6622	2.30045	2.19638	0.0407282	0.708104
ENSG00000175832	ETV4	1.7313	2.96462	9.84379	1.25699	2.64267	0.532332	309.026	103.328	1.58161	0.0408588	0.708771
ENSG00000179909	ZNF154	1.43339	0.914613	0.918664	0.722285	2.08562	0.662308	152.77	79.1516	0.949785	0.0411626	0.712319
ENSG00000003249	DBNDD1	1.96746	0.494586	2.83924	1.04205	0.735282	0.860491	159.996	69.2045	1.20717	0.041358	0.714349
ENSG00000187094	CCK	0.339069	0.786794	0	0.439799	0.372698	1.81476	8.94255	38.2112	-2.09609	0.041497	0.71552
ENSG00000134504	KCTD1	2.39447	1.12869	1.30841	0.774302	1.17818	0.610394	261.242	134.521	0.957685	0.0415985	0.716657
ENSG00000004455	AK2	25.923	15.1815	54.5269	17.8618	18.2272	17.3061	3405.35	1737.56	0.970722	0.0418092	0.71967
ENSG00000165886	UBTD1	20.7198	42.5234	23.1357	31.6231	22.4407	30.6536	681.531	1077.35	-0.660427	0.041942	0.721337
ENSG00000166997	CNPY4	3.04682	6.75088	2.89951	4.34305	2.99318	4.24412	133.324	228.751	-0.778112	0.0421395	0.723692
ENSG00000183018	SPNS2	8.58405	9.35534	6.70895	14.858	7.06947	12.5559	553.968	910.856	-0.717809	0.0421509	0.723692
ENSG00000149571	KIRREL3	0.232294	0.0460706	0.129947	0.0463543	0.0549947	0.00856447	16.5786	4.01275	2.0412	0.0422275	0.723772
ENSG00000112742	TTK	0.231587	0.278645	1.09939	0.12238	0.237586	0.0493332	43.2803	12.4264	1.80651	0.0422875	0.724183
ENSG00000146469	VIP	0.371927	0.537002	0.169048	0.675385	0.294346	1.17654	7.97309	22.8022	-1.52062	0.0425502	0.724818
ENSG00000153157	SYCP2L	0.133826	0.260698	0.081102	0.578609	0.183056	0.270825	9.50164	26.5037	-1.48265	0.0425717	0.724818
ENSG00000185269	NOTUM	0.839108	0.966009	0.603129	2.14303	1.25265	2.86205	49.0255	108.626	-1.14791	0.0424777	0.724818
ENSG00000066382	MPPED2	0.445604	0.0963588	0.0457339	0.0435041	0.13904	0.0206688	31.1368	7.92928	1.97712	0.042577	0.724818
ENSG00000139800	ZIC5	0	0	0.323242	0	0	0	9.03588	0	5.60361	0.0424077	0.724818
ENSG00000174740	PABPC5	0.256144	0.475497	0.263891	0.457752	0.300319	0.982159	17.0545	39.8197	-1.22196	0.0427521	0.726462
ENSG00000124785	NRN1	8.40171	11.7445	4.00277	16.7842	11.6828	19.1401	337.901	668.704	-0.984797	0.0427819	0.726462
ENSG00000172164	SNTB1	10.8854	5.29907	12.3749	6.11202	6.66042	6.22465	1238.28	729.864	0.762493	0.0427525	0.726462
ENSG00000168397	ATG4B	5.00558	7.24922	4.71162	7.72055	5.42399	7.98022	605.641	917.989	-0.600017	0.0430956	0.73117
ENSG00000115297	TLX2	0.02123	0	0.733357	0.0367159	0	0	12.618	0.613953	4.31029	0.0432324	0.732256
ENSG00000166444	ST5	5.96485	2.55182	3.2068	2.3182	3.75225	2.71244	1110.69	651.641	0.769194	0.0433853	0.73361
ENSG00000141736	ERBB2	8.1112	5.20396	21.9437	9.71877	13.5573	7.35953	2712.37	1385.79	0.968768	0.043517	0.734601
ENSG00000154274	C4orf19	3.8283	1.11865	3.3834	2.00463	1.62709	1.20288	147.533	72.2104	1.02802	0.0435171	0.734601
ENSG00000105514	RAB3D	5.6419	2.98494	5.9653	4.68259	8.72604	4.1809	541.193	315.36	0.778826	0.0436526	0.735654
ENSG00000176697	BDNF	0.426245	0.353244	0.179898	1.18473	0.522066	1.18931	52.6197	127.201	-1.27449	0.0437225	0.736216
ENSG00000186952	TMEM232	0.425077	0.0889482	0.0560016	0.079907	0.50922	0.153543	57.0661	18.5782	1.6195	0.0437875	0.736692
ENSG00000236699	ARHGEF38	1.98994	0.376781	1.16591	0.867092	1.03897	0.827105	191.577	94.5813	1.01596	0.0439237	0.738366
ENSG00000068831	RASGRP2	4.04762	3.64508	2.97524	7.42715	3.68697	8.67904	392.636	724.106	-0.883342	0.0440281	0.738886
ENSG00000120318	ARAP3	5.66656	9.85131	3.72266	6.70351	5.04985	7.44955	538.229	894.784	-0.733272	0.043993	0.738886
ENSG00000178852	EFCAB13	0.900652	0.218554	0.610032	0.343593	0.279523	0.220073	71.9742	31.4487	1.19006	0.0440863	0.739245
ENSG00000130032	PRRG3	0.10183	2.47271	0.302947	0.256158	0.390735	0.204102	30.5067	112.475	-1.87925	0.04442	0.73948
ENSG00000186827	TNFRSF4	2.22508	28.808	5.1345	4.85457	5.26779	3.47836	130.952	385.169	-1.55553	0.0444588	0.73948
ENSG00000146281	PM20D2	4.09189	4.06516	6.73411	2.68351	5.27073	2.38708	456.659	259.178	0.817957	0.0441541	0.73948
ENSG00000164251	F2RL1	4.74014	5.71018	12.764	2.89333	6.2173	2.69197	422.821	201.336	1.07135	0.0445049	0.73948
ENSG00000133067	LGR6	3.03372	0.318174	1.18023	0.933721	1.25471	1.05974	151.025	63.839	1.2396	0.0445022	0.73948
ENSG00000183010	PYCR1	4.38889	6.56843	24.2535	2.80665	3.78754	1.48719	563.975	188.901	1.57855	0.0444945	0.73948
ENSG00000161664	ASB16	0.237766	0.0544914	0.456293	0.137067	0.302002	0.0759742	13.3847	3.59501	1.88301	0.0442331	0.73948
ENSG00000151632	AKR1C2	25.6771	1.14726	0.381288	2.43639	2.55778	3.26905	1114.11	266.796	2.06186	0.044793	0.74304
ENSG00000145642	SHISAL2B	1.0926	0	0	0	0	0	8.87504	0	5.57429	0.0447749	0.74304
ENSG00000117114	ADGRL2	21.2662	35.5427	7.11387	21.3326	9.70759	20.6042	1779.62	3620.19	-1.02457	0.0448887	0.743708
ENSG00000182118	FAM89A	12.3782	18.6791	6.48737	12.1294	10.2788	21.8914	420.432	760.242	-0.854628	0.0449181	0.743708
ENSG00000135480	KRT7	97.2867	45.8542	91.7215	41.4094	58.1335	59.8408	6095.45	3628.15	0.74849	0.0449443	0.743708
ENSG00000136098	NEK3	2.41335	3.21426	1.67984	4.04256	1.60072	2.60426	146.575	253.848	-0.793643	0.0450251	0.744372
ENSG00000136327	NKX2-8	1.82206	0.0963647	8.49395	0.888782	0.698402	1.70184	83.694	20.4173	2.03341	0.0450585	0.744372
ENSG00000160678	S100A1	0.0777732	0.0601564	3.12842	0.369886	0.170973	0.22366	61.6614	11.9355	2.36475	0.045096	0.74438
ENSG00000136002	ARHGEF4	0.677355	0.458075	0.262447	1.51711	0.483337	1.21347	90.9958	203.883	-1.16559	0.0451878	0.744787
ENSG00000142871	CYR61	250.891	578.178	130.319	245.898	139.441	228.174	7702.22	15566.4	-1.01509	0.0453429	0.744787
ENSG00000184226	PCDH9	0.22656	0.3495	0.112495	0.377005	0.277909	0.43801	115.041	217.14	-0.916506	0.0452173	0.744787
ENSG00000124813	RUNX2	1.71159	1.06801	1.80432	1.19398	1.68214	1.04097	256.595	163.046	0.653809	0.0453104	0.744787
ENSG00000171533	MAP6	2.94887	1.22782	1.58174	1.30665	2.44006	1.47484	270.213	155.418	0.797452	0.0453347	0.744787
ENSG00000157224	CLDN12	6.96541	3.2087	5.71215	3.40831	3.41217	2.52169	653.568	371.216	0.815743	0.0452593	0.744787
ENSG00000006625	GGCT	11.1776	6.81007	27.5988	7.46446	6.52022	6.57745	435.902	200.664	1.11916	0.0455298	0.746028
ENSG00000166823	MESP1	0.323289	0.384706	2.8484	0.387075	0.6123	0.429098	54.0172	17.1428	1.65687	0.0455164	0.746028
ENSG00000103241	FOXF1	2.49661	6.11727	4.08207	13.1126	9.09092	15.9496	331.99	745.342	-1.16646	0.0456954	0.747051
ENSG00000100883	SRP54	18.7774	12.3758	23.7105	12.974	17.9718	13.8762	1421.94	922.55	0.624153	0.0456685	0.747051
ENSG00000164093	PITX2	0.203605	0	0.333153	0.0440153	0	0.0195176	18.7176	2.21549	3.05699	0.0457037	0.747051
ENSG00000258659	TRIM34	0.0219008	0	0.637078	0.018938	0.0770334	0.0629823	11.9304	1.32789	3.16196	0.0457611	0.747381
ENSG00000253729	PRKDC	5.90011	5.89963	9.01083	3.68436	7.18421	2.8792	2052.65	1157.84	0.826237	0.0459299	0.748921
ENSG00000129048	ACKR4	2.02166	1.17613	0.65971	5.75998	1.39028	3.32931	55.7683	140.603	-1.33661	0.0460513	0.749104
ENSG00000178381	ZFAND2A	8.52317	26.3435	6.73832	6.96814	3.86096	9.70533	262.837	591.267	-1.16959	0.0460901	0.749104
ENSG00000228253	MT-ATP8	482.405	113.884	318.48	215.586	149.409	134.774	1185.35	579.076	1.03309	0.0460386	0.749104
ENSG00000243364	EFNA4	5.45752	2.59773	9.03173	2.90413	2.87122	2.90643	132.124	63.9925	1.04538	0.0460564	0.749104
ENSG00000114854	TNNC1	32.1803	14.6173	9.03271	57.7474	20.3139	83.1156	433.038	1094.3	-1.33772	0.0463222	0.752268
ENSG00000072163	LIMS2	4.70639	4.23809	1.89305	7.6412	4.92596	12.7694	589.424	1260.57	-1.0968	0.0463741	0.752502
ENSG00000169851	PCDH7	3.59761	1.94441	1.98932	0.428375	1.53947	0.285852	526.004	196.236	1.42329	0.0464159	0.752574
ENSG00000187688	TRPV2	12.2664	18.2808	13.8048	17.987	12.7917	23.9477	798.559	1237.32	-0.631686	0.0465314	0.753231
ENSG00000171819	ANGPTL7	0.394861	0.081445	0.143577	2.3901	0.462958	1.38788	13.5047	52.0476	-1.94883	0.0468688	0.753632
ENSG00000164283	ESM1	22.0569	70.4522	3.59679	14.801	3.09484	10.2471	466.867	1550.89	-1.73221	0.0469029	0.753632
ENSG00000197465	GYPE	0.529161	0.667004	0.267237	2.51666	0.853076	1.21177	19.9187	53.0784	-1.41559	0.0470687	0.753632
ENSG00000198225	FKBP1C	7.16361	16.8537	5.66408	8.61423	5.83995	8.47648	177.619	322.975	-0.862278	0.0466033	0.753632
ENSG00000154678	PDE1C	0.763003	0.866024	0.565729	1.26428	0.521011	0.992925	154.052	260.112	-0.757148	0.0471184	0.753632
ENSG00000111450	STX2	6.96261	13.6922	5.8402	9.89311	8.2515	10.4059	472.337	762.566	-0.690763	0.0471088	0.753632
ENSG00000106460	TMEM106B	4.51185	3.30802	5.70804	3.15572	4.05713	2.52906	1192.99	751.441	0.666876	0.0470641	0.753632
ENSG00000140396	NCOA2	4.7831	4.81167	12.4511	4.40025	6.48983	3.36839	1433.29	760.041	0.915281	0.046689	0.753632
ENSG00000116128	BCL9	1.60589	1.76974	3.83723	1.37277	2.5499	1.08198	309.217	163.428	0.920757	0.0469801	0.753632
ENSG00000137804	NUSAP1	0.573763	0.211332	0.838242	0.194914	0.19821	0.157145	27.8959	9.76036	1.51446	0.0469104	0.753632
ENSG00000137142	IGFBPL1	0.377303	0.111177	2.74386	0.512696	0.331779	0.0516689	22.742	4.44928	2.33825	0.0468221	0.753632
ENSG00000275713	HIST1H2BH	0.62917	0.0589883	0.233975	0.0494596	0.025148	0.0274146	11.0266	1.68649	2.70565	0.0468166	0.753632
ENSG00000109929	SC5D	16.0461	6.33123	14.0669	8.20073	8.54419	8.18804	1296.56	762.025	0.766531	0.0472071	0.753875
ENSG00000144191	CNGA3	0.0941965	0.013878	0.513769	0	0.0946642	0.103196	18.5362	3.08855	2.59235	0.0472328	0.753875
ENSG00000143476	DTL	0.575231	0.741554	2.10252	0.290157	0.64282	0.137854	98.3654	34.6461	1.50896	0.0473146	0.75437
ENSG00000184363	PKP3	9.64515	2.11778	14.0285	5.2867	5.64971	6.48699	669.155	317.002	1.07741	0.0474594	0.756079
ENSG00000174156	GSTA3	0.391884	0.0673592	0	0	1.723	0.12522	11.4951	1.04673	3.47788	0.0475262	0.756544
ENSG00000104524	PYCR3	3.9227	2.41608	6.86764	2.4184	3.05017	2.73318	270.552	147.931	0.871046	0.0477779	0.759823
ENSG00000064195	DLX3	0	0.111893	1.97254	0.2064	0.477025	0.124805	40.0752	7.24916	2.46446	0.0478078	0.759823
ENSG00000111696	NT5DC3	0.965901	0.773232	0.693836	0.379651	1.48489	0.427344	165.274	83.0527	0.995101	0.0478605	0.760059
ENSG00000160345	C9orf116	1.92795	1.10825	0.804465	0.382622	3.55742	0.939216	70.6486	27.2951	1.37661	0.0480965	0.763205
ENSG00000171159	C9orf16	21.0556	26.9061	18.4637	25.8701	15.6163	34.4893	552.18	873.96	-0.662594	0.0481816	0.763952
ENSG00000164400	CSF2	1.87145	0.231606	0.340244	0.129462	1.25069	0.502311	16.4198	4.09444	2.00698	0.04829	0.765067
ENSG00000168067	MAP4K2	4.0667	4.60709	3.7598	5.9808	2.57366	6.63012	479.36	793.607	-0.727689	0.0483464	0.765358
ENSG00000041353	RAB27B	2.4098	1.29985	2.70222	2.10436	2.7673	1.28419	352.868	209.966	0.748055	0.0484335	0.766134
ENSG00000142700	DMRTA2	0.365353	0.0188397	0.099636	0	0	0.0175114	9.0363	0.706422	3.70412	0.0485631	0.766925
ENSG00000123411	IKZF4	1.2288	1.3833	1.825	0.740804	2.51111	0.80464	228.295	120.148	0.92806	0.0486462	0.767084
ENSG00000134884	ARGLU1	34.3136	33.6313	20.3802	45.2791	28.0514	67.0497	2896.92	5110.08	-0.818871	0.0486956	0.76726
ENSG00000152926	ZNF117	3.04182	2.31302	7.31858	2.22529	2.09333	1.43153	802.297	384.591	1.06085	0.0488172	0.768575
ENSG00000009780	FAM76A	2.05919	3.2834	2.46929	3.47284	2.55557	5.01183	172.201	286.061	-0.731835	0.0491009	0.771521
ENSG00000189319	FAM53B	6.26366	9.06073	6.50255	11.5305	7.87881	11.3493	799.169	1236.42	-0.629591	0.0490999	0.771521
ENSG00000146733	PSPH	2.75156	1.56184	9.81119	2.50843	1.9319	1.94245	241.24	100.072	1.26891	0.0491194	0.771521
ENSG00000173627	APOBEC4	0.17765	0	0	0.0192022	0.488173	0.0425738	10.6442	0.987585	3.41918	0.0491765	0.771813
ENSG00000167165	UGT1A6	1.13732	0	0	0	0.0900086	0	38.3097	0	7.68648	0.0492612	0.77254
ENSG00000134668	SPOCD1	0.997824	0.617442	0.566913	1.59625	0.628825	2.66229	93.65	208.171	-1.15366	0.0494032	0.77298
ENSG00000147852	VLDLR	1.12288	5.29575	1.30173	3.45295	2.78468	2.03183	293.154	606.678	-1.04869	0.0494431	0.77298
ENSG00000104341	LAPTM4B	48.1699	41.4112	137.546	30.4035	25.6189	16.8521	4071.29	1708.13	1.25309	0.0493361	0.77298
ENSG00000157111	TMEM171	0.690839	0.0791635	0.488444	0.199127	0.269993	0.110373	13.4053	3.59501	1.88058	0.049517	0.773535
ENSG00000272398	CD24	22.3326	33.0373	155.787	30.9904	30.1764	6.34582	3887.22	1313.31	1.56554	0.0496444	0.774923
ENSG00000153930	ANKFN1	0.165001	0.0891354	0.0214275	0.00679426	0.366186	0.0150638	24.9681	5.01488	2.33349	0.0497144	0.775413
ENSG00000111490	TBC1D30	0.720226	1.04901	2.80263	0.983357	2.73886	0.932656	351.852	166.608	1.07904	0.0498073	0.77553
ENSG00000162836	ACP6	2.81266	0.350527	1.19109	0.907269	1.07422	1.05299	365.965	166.536	1.13474	0.0498046	0.77553
ENSG00000146005	PSD2	0.979058	0.0807773	0.0118667	0.0790169	0.103311	0	29.7574	4.34554	2.7727	0.0498376	0.77553
ENSG00000128040	SPINK2	0.534187	0.39351	8.60199	0.593899	0	0.438918	42.5011	6.63521	2.67773	0.0499618	0.776862
ENSG00000143452	HORMAD1	0.0244961	0.101053	1.51422	0.148276	0.172324	0	24.7966	3.61331	2.77443	0.050055	0.77771
ENSG00000164850	GPER1	1.55281	0.733186	0.544217	3.86645	1.21739	3.81994	62.8924	159.765	-1.34664	0.0502074	0.77828
ENSG00000005001	PRSS22	3.60341	1.32359	9.46792	3.32935	2.82138	2.38956	228.596	101.297	1.17296	0.0502079	0.77828
ENSG00000162460	TMEM82	0	0	1.12746	0.0335154	0	0	10.3267	0.306977	4.8346	0.0502772	0.778754
ENSG00000008300	CELSR3	0.118905	0.166424	0.625373	0.0807867	0.238991	0.138407	82.1979	32.2363	1.35387	0.0503317	0.778999
ENSG00000183032	SLC25A21	0.604564	0.114854	0.245861	0.0687866	0.11192	0.106756	21.4735	6.47984	1.72909	0.050546	0.781112
ENSG00000166510	CCDC68	4.71988	2.74466	1.49911	7.44481	1.65016	7.60983	245.627	555.585	-1.17843	0.0510488	0.783999
ENSG00000100034	PPM1F	7.49635	17.3964	5.59285	9.55409	8.63159	10.4345	1319.72	2271.46	-0.783279	0.0511219	0.783999
ENSG00000116717	GADD45A	98.1222	40.8185	20.9921	21.7907	67.7045	22.1911	2329.16	1057.25	1.13956	0.0511228	0.783999
ENSG00000131080	EDA2R	3.34154	1.57879	1.60109	0.839804	1.53432	0.378703	139.685	60.3279	1.21228	0.0510256	0.783999
ENSG00000178999	AURKB	0.578354	0.515128	2.58093	0.409184	0.346753	0.151202	47.3453	14.5236	1.70643	0.0509493	0.783999
ENSG00000082458	DLG3	4.66409	2.30824	6.19248	4.13704	4.63629	2.72147	732.297	433.282	0.756604	0.0512365	0.785144
ENSG00000091831	ESR1	0.391224	0.521885	1.44574	0.470676	0.987189	0.375027	235.766	114.169	1.04692	0.0514239	0.786219
ENSG00000078053	AMPH	4.01396	0.765404	0.199546	0.198856	0.367672	0.230466	155.584	40.5749	1.94023	0.0514186	0.786219
ENSG00000163803	PLB1	1.68058	0.641654	1.15716	0.593659	0.609988	0.555281	171.148	88.8867	0.9444	0.0516216	0.788043
ENSG00000163687	DNASE1L3	1.14158	1.04223	1.10579	4.82246	1.95832	3.71351	79.7793	181.692	-1.18776	0.0520746	0.793752
ENSG00000054179	ENTPD2	0.313249	0.0692267	0.366114	0.0773921	0.255778	0.15014	14.837	4.70839	1.65543	0.0521584	0.794428
ENSG00000269190	FBXO17	1.46095	2.56016	1.72756	3.24558	2.14113	2.86925	159.293	259.28	-0.702497	0.0523166	0.79516
ENSG00000104228	TRIM35	3.49146	6.58958	4.19001	6.52753	5.38801	7.81827	336.204	538.549	-0.679291	0.0523252	0.79516
ENSG00000158373	HIST1H2BD	10.5516	1.74391	11.5594	5.79035	5.53141	5.18706	145.081	66.768	1.11683	0.0522484	0.79516
ENSG00000179144	GIMAP7	10.1316	11.2712	17.4393	50.2538	17.8595	36.5553	343.838	742.317	-1.11037	0.0527342	0.797186
ENSG00000157927	RADIL	0.89509	2.12597	0.854766	1.39164	1.19256	1.49939	115.532	196.989	-0.768442	0.0526707	0.797186
ENSG00000150527	MIA2	4.16456	2.23108	3.54692	2.81327	3.53428	2.28276	714.177	465.318	0.617642	0.0526248	0.797186
ENSG00000072195	SPEG	1.13813	0.668304	0.580097	0.355551	1.33634	0.586498	329.658	173.794	0.924463	0.0526136	0.797186
ENSG00000166851	PLK1	0.346548	0.497807	2.56521	0.428095	0.424452	0.177965	95.6925	31.6622	1.59646	0.052736	0.797186
ENSG00000103546	SLC6A2	0.010784	0	0.0098031	0	0.265521	0.0206751	9.41843	0.680609	3.80005	0.0526377	0.797186
ENSG00000178826	TMEM139	2.94107	1.70615	1.81717	7.60971	2.46498	6.58571	111.601	245.684	-1.13957	0.0529034	0.798846
ENSG00000134602	STK26	6.00725	3.58678	6.6903	5.17939	6.78067	3.14868	393.668	240.807	0.708433	0.0530987	0.800328
ENSG00000101846	STS	13.3167	7.3886	9.5184	4.867	6.5779	4.29553	1155.77	650.369	0.829592	0.0531031	0.800328
ENSG00000112378	PERP	29.0721	13.0014	36.7141	17.9192	16.894	16.679	2137.35	1230.49	0.796474	0.0531958	0.801125
ENSG00000121895	TMEM156	1.10376	1.32804	11.6014	1.41178	0.303308	0.683333	200.827	52.8474	1.92605	0.0533322	0.802578
ENSG00000276409	CCL14	0.0540653	0.985063	0.229355	0.12467	0.364489	1.14019	12.7628	44.3201	-1.78858	0.0537131	0.80671
ENSG00000143882	ATP6V1C2	0.642751	0.680322	2.15263	0.380283	0.550326	0.194571	70.2197	26.3436	1.41748	0.0537272	0.80671
ENSG00000074410	CA12	0.306126	2.89126	0.270957	1.30963	1.63639	1.62943	97.5413	256.925	-1.39568	0.0539287	0.806724
ENSG00000110013	SIAE	12.8192	4.57607	5.67851	3.95579	5.0602	4.19098	1155.38	623.983	0.888655	0.0539108	0.806724
ENSG00000147804	SLC39A4	3.40627	1.97979	10.098	2.83412	2.75854	2.85008	493.219	232.434	1.08524	0.0537737	0.806724
ENSG00000114455	HHLA2	0.227401	0.31828	0.16242	0.0702279	1.59971	0	43.4827	8.49112	2.36552	0.0538118	0.806724
ENSG00000142609	CFAP74	0.10175	0.0466382	0.0256929	0	0.54181	0.0812811	42.03	8.03351	2.39396	0.0539209	0.806724
ENSG00000168350	DEGS2	0.817873	0.163255	0.731486	0.695823	1.54278	0.455233	83.2139	35.3699	1.23021	0.0540714	0.808257
ENSG00000270170	NCBP2-AS2	10.0114	16.0168	10.0341	15.7603	13.7131	25.6533	186.743	317.689	-0.766096	0.0542954	0.810675
ENSG00000170425	ADORA2B	4.06457	1.11941	5.4793	2.67597	2.82277	2.52374	190.099	97.1371	0.966842	0.0544465	0.81085
ENSG00000169607	CKAP2L	0.31607	0.2794	1.23137	0.263551	0.258082	0.0973878	56.7817	20.1379	1.49607	0.0543741	0.81085
ENSG00000137809	ITGA11	1.0954	1.24156	3.25842	0.206324	0.600831	0.171543	324.355	106.015	1.61478	0.0544374	0.81085
ENSG00000170381	SEMA3E	0.832226	0.338987	0.750168	6.12602	1.11924	1.49498	137.14	404.063	-1.55932	0.0547801	0.811011
ENSG00000130518	IQCN	1.17775	1.40047	1.22858	6.29418	2.57497	3.43015	274.771	613.651	-1.15924	0.0546201	0.811011
ENSG00000105974	CAV1	182.325	204.124	34.1635	289.386	150.681	312.226	9031.45	19819.1	-1.13387	0.0547612	0.811011
ENSG00000120910	PPP3CC	8.25069	10.8983	4.45209	10.5436	6.02217	9.52599	327.105	540.976	-0.726252	0.0546112	0.811011
ENSG00000116983	HPCAL4	0.522407	0.440807	0.690745	0.626269	1.93146	0.239008	94.0247	39.0522	1.26724	0.0547144	0.811011
ENSG00000102385	DRP2	0.0791554	0.0222638	0.130828	0.00622247	0.00632771	0.00689802	10.6714	1.74563	2.63062	0.0545095	0.811011
ENSG00000161996	WDR90	1.25835	1.37274	2.3437	0.967218	2.21796	1.02398	369.433	213.53	0.791855	0.0548399	0.8113
ENSG00000162062	TEDC2	0.165139	0.191598	1.93276	0.196348	0.0544551	0.0791508	37.0157	8.03302	2.20424	0.0550756	0.81359
ENSG00000117472	TSPAN1	30.1787	0.898786	3.05572	3.74647	18.4142	11.2662	736.362	226.852	1.69845	0.0552434	0.815469
ENSG00000171877	FRMD5	0.1236	0.182101	0.730323	0.0229027	0.0931604	0.0169262	38.0827	8.9239	2.10477	0.0553359	0.816235
ENSG00000125968	ID1	61.9234	64.2073	17.2434	99.8209	89.7869	252.462	1255.3	3094.46	-1.30165	0.0553863	0.816379
ENSG00000198380	GFPT1	10.346	9.51185	12.3647	5.87808	11.172	4.89833	1810.19	1083.9	0.740109	0.0556233	0.818602
ENSG00000132840	BHMT2	1.20344	1.10747	3.28193	0.384236	0.927996	0.780912	103.797	43.5757	1.2554	0.0556592	0.818602
ENSG00000104760	FGL1	1.28499	0.0552178	0.113566	0.0462981	0.0156937	0.153974	28.1313	5.08202	2.46709	0.0556032	0.818602
ENSG00000107954	NEURL1	0.213755	0.992017	0.118746	0.236182	0.344601	0.523646	20.2414	52.37	-1.36711	0.0558503	0.819461
ENSG00000129596	CDO1	3.31034	2.60907	1.49238	9.72788	4.40188	8.38469	121.414	273.33	-1.17121	0.0559876	0.819461
ENSG00000129646	QRICH2	0.489668	0.399793	0.417307	1.01446	0.340881	1.15393	43.4245	89.3707	-1.04397	0.0561253	0.819461
ENSG00000132680	KHDC4	6.45066	3.70909	8.8291	3.66141	5.13913	4.98095	693.336	419.401	0.725242	0.05608	0.819461
ENSG00000155792	DEPTOR	18.9412	10.3581	9.17083	2.54522	8.71319	3.38156	581.83	257.296	1.17782	0.0559463	0.819461
ENSG00000121933	TMIGD3	7.35447	0.984689	2.06429	1.58431	1.56572	1.97894	151.114	62.566	1.27025	0.0558042	0.819461
ENSG00000178882	RFLNA	1.59677	1.76166	4.017	0.658266	1.45309	0.249177	135.118	51.0332	1.4073	0.0561084	0.819461
ENSG00000101470	TNNC2	1.4123	0.762942	18.3405	1.74464	1.59673	3.41681	112.697	31.2727	1.84901	0.0560365	0.819461
ENSG00000122574	WIPF3	0.155418	0.0901602	0.344373	0.0839956	0.222082	0.121049	26.3821	10.7888	1.293	0.0561695	0.819512
ENSG00000070882	OSBPL3	4.5385	3.34544	6.02982	2.90566	3.46646	2.001	685.028	402.779	0.766254	0.0564429	0.822307
ENSG00000204583	LRCOL1	0.29181	0.300948	0.14737	0.869149	0.598737	2.14459	11.3641	36.2923	-1.67328	0.0567375	0.824211
ENSG00000213203	GIMAP1	2.12749	2.43232	2.53074	5.4034	2.98258	6.25807	223.121	411.556	-0.883366	0.0567111	0.824211
ENSG00000243449	C4orf48	31.0931	12.1516	48.3973	14.2453	10.2651	15.6873	292.06	136.94	1.09237	0.0567098	0.824211
ENSG00000186871	ERCC6L	0.256497	0.125303	0.478602	0.16343	0.23742	0.0129409	25.5741	7.93304	1.6847	0.0567001	0.824211
ENSG00000183570	PCBP3	0.422781	0.355934	0.376481	0.0671485	0.569035	0.132335	56.2978	22.8524	1.30921	0.0568425	0.82514
ENSG00000203963	C1orf141	0.11731	0	0	0.0202881	0.175365	0	8.85688	0.613953	3.79297	0.0569051	0.825452
ENSG00000123545	NDUFAF4	4.01259	7.46318	3.54218	4.55281	2.85539	5.40284	159.334	266.606	-0.742494	0.0569897	0.826083
ENSG00000157315	TMED6	0.250517	0.645903	0.341594	0.938715	0.330436	0.76046	7.84392	19.9389	-1.34537	0.0571322	0.826988
ENSG00000141750	STAC2	0.490651	0.162648	0.653102	0.212138	0.184908	0.0167978	26.9172	7.93304	1.75758	0.0571344	0.826988
ENSG00000240682	ISY1	3.20274	4.33985	2.75475	4.6075	2.8542	4.43312	217.807	330.739	-0.60304	0.0573465	0.828865
ENSG00000160799	CCDC12	5.15522	6.22405	5.30587	8.72274	4.38065	8.06604	425.169	659.245	-0.633146	0.0575524	0.831244
ENSG00000096063	SRPK1	6.7435	4.37617	7.27449	3.53223	4.38933	3.44313	742.275	457.75	0.697469	0.0576754	0.831825
ENSG00000152433	ZNF547	0.247673	0.510857	0.40526	0.899504	0.362983	0.680602	21.8424	44.9562	-1.04127	0.0578552	0.832128
ENSG00000143153	ATP1B1	64.7409	25.1893	72.1592	47.0564	46.2257	36.6071	3268.53	1942.87	0.75032	0.0577684	0.832128
ENSG00000105649	RAB3A	0.842543	0.334202	1.17831	0.896693	4.35982	1.08724	69.9003	25.3951	1.4597	0.0578047	0.832128
ENSG00000100060	MFNG	8.83117	7.66964	9.64753	20.4309	8.12326	21.1824	487.63	903.388	-0.889793	0.0579916	0.832712
ENSG00000129009	ISLR	17.2924	23.043	40.6019	11.7107	30.0628	12.0729	1415.67	753.675	0.909791	0.0580269	0.832712
ENSG00000165591	FAAH2	10.1253	1.89587	3.3687	2.32134	1.87309	2.43351	186.958	80.9138	1.20691	0.0580182	0.832712
ENSG00000142694	EVA1B	14.5945	31.6082	17.9104	22.7583	12.2347	19.3066	326.478	537.615	-0.719381	0.0580871	0.832982
ENSG00000198841	KTI12	0.790551	2.16233	0.843622	1.36721	1.08809	1.71333	28.1163	54.1499	-0.941735	0.0582128	0.834189
ENSG00000152583	SPARCL1	184.059	701.521	96.8815	186.968	287.855	343.587	11917.3	25814.3	-1.1151	0.0583459	0.835319
ENSG00000148702	HABP2	2.96419	1.46205	2.22594	0.529354	2.50738	0	169.626	43.8835	1.95215	0.0583747	0.835319
ENSG00000116106	EPHA4	6.71489	3.25748	2.78619	2.31315	4.08048	1.75687	618.222	333.542	0.890289	0.0584666	0.836039
ENSG00000129245	FXR2	6.78774	11.0546	6.34343	10.1157	8.06201	10.5881	553.098	828.828	-0.583367	0.0586589	0.837598
ENSG00000188488	SERPINA5	0.296517	0.112664	0.156052	0.0674746	0.219571	0.0299201	15.2895	4.77832	1.68373	0.0586347	0.837598
ENSG00000169994	MYO7B	0.435154	0.296885	0.237343	0.88572	0.329668	0.93054	53.1423	112.055	-1.0787	0.0588369	0.838961
ENSG00000241794	SPRR2A	2.24352	0	0	0.0718524	0	0	9.58505	0.306977	4.723	0.0588378	0.838961
ENSG00000137474	MYO7A	1.08572	0.760448	1.91586	0.758101	0.74029	0.345067	228.794	113.949	1.00555	0.0591362	0.840829
ENSG00000105048	TNNT1	0.434183	0.223889	6.68504	0.586635	0.286347	1.04052	96.8805	24.2155	1.99953	0.0591258	0.840829
ENSG00000185614	INKA1	0.84971	4.84895	2.16277	2.59615	3.13819	6.51625	38.5455	87.4941	-1.17851	0.0592748	0.84161
ENSG00000184860	SDR42E1	0.672672	0.168333	0.42714	0.461916	0.85682	0.346118	140.435	70.0776	1.00036	0.0592563	0.84161
ENSG00000118137	APOA1	0.537831	0.469338	0.150434	0.608172	0.181899	1.66567	7.46671	23.5387	-1.66666	0.0594495	0.841639
ENSG00000263155	MYZAP	6.57914	3.22651	0.606434	9.60782	1.11256	11.6432	128.058	377.742	-1.56192	0.0593839	0.841639
ENSG00000173852	DPY19L1	15.8309	10.9844	14.7492	5.63964	8.96974	5.24441	1496.18	827.29	0.854996	0.0594595	0.841639
ENSG00000253293	HOXA10	0.0476773	0.0491702	1.22798	0.16491	0.0419247	0.0152345	29.4319	5.12238	2.51343	0.0594862	0.841639
ENSG00000136940	PDCL	8.4242	11.5454	8.71301	11.7848	7.96746	14.2666	476.068	712.959	-0.582685	0.0595602	0.842094
ENSG00000115705	TPO	0.919974	0.122192	0.0380133	0.00602666	0.0306429	0.0601286	50.3573	9.59372	2.39714	0.0597275	0.843867
ENSG00000175048	ZDHHC14	1.34026	2.28368	0.967937	1.89646	1.38352	1.70118	247.394	394.128	-0.671735	0.0599289	0.846017
ENSG00000072310	SREBF1	8.85532	7.12752	15.6528	8.39963	15.8383	9.07243	1952.26	1190.31	0.713848	0.0599639	0.846017
ENSG00000077157	PPP1R12B	3.81682	2.98469	2.50119	1.80861	5.00617	1.58682	1437.7	810.011	0.827966	0.0601183	0.8476
ENSG00000050555	LAMC3	4.8797	19.6019	2.85614	6.07778	4.95265	3.39112	580.628	1330.29	-1.19594	0.0607489	0.850528
ENSG00000128656	CHN1	6.37604	18.4804	3.16737	6.33333	3.90804	4.41932	402.931	875.66	-1.11982	0.0605739	0.850528
ENSG00000159214	CCDC24	1.39243	0.649635	3.96308	1.66275	2.04071	1.20766	158.397	75.3849	1.06963	0.0606473	0.850528
ENSG00000181649	PHLDA2	34.546	17.4957	28.6558	8.00157	8.08266	3.54811	410.219	167.147	1.29571	0.0607355	0.850528
ENSG00000077152	UBE2T	1.99706	0.772347	6.77534	1.75773	0.564461	0.546965	92.9456	30.631	1.59882	0.0606759	0.850528
ENSG00000101057	MYBL2	2.4609	2.90991	11.1853	1.17406	0.914096	0.305046	243.648	73.4448	1.73116	0.0605165	0.850528
ENSG00000127252	HRASLS	0.503962	0.0519743	1.55761	0.0871571	0.0886313	0.289859	15.1465	3.0219	2.32443	0.0607024	0.850528
ENSG00000109182	CWH43	0.0375483	0.038724	0	0	0.528285	0	10.6994	0.732236	3.9172	0.0605636	0.850528
ENSG00000149218	ENDOD1	31.4112	10.3575	9.14092	8.8583	14.2582	9.19346	1548.02	802.366	0.948	0.0608302	0.850536
ENSG00000198929	NOS1AP	0.25776	0.187645	0.509976	0.157334	0.379988	0.232553	53.7442	27.044	0.993641	0.0608341	0.850536
ENSG00000139187	KLRG1	0.566909	0.467729	0.907002	4.62765	1.25624	2.19549	42.7409	114.14	-1.4174	0.0610713	0.851329
ENSG00000186638	KIF24	0.365145	0.237839	0.506631	0.324057	0.566128	0.110535	53.1226	24.8426	1.09458	0.0610408	0.851329
ENSG00000175928	LRRN1	4.4627	1.62439	1.20573	0.848259	1.42148	0.291377	182.169	71.0195	1.35948	0.0610509	0.851329
ENSG00000170442	KRT86	0.639826	0.431447	1.52118	0.319194	0.411151	0.283078	37.1055	14.9123	1.31772	0.0611567	0.851493
ENSG00000137812	KNL1	0.189672	0.254887	0.783722	0.178923	0.298194	0.066116	78.5395	30.8779	1.34893	0.0613103	0.851861
ENSG00000175063	UBE2C	3.02354	2.12606	7.57923	1.50532	1.0071	0.614804	89.9676	32.9047	1.45214	0.061277	0.851861
ENSG00000204382	XAGE1B	21.7071	0	11.4002	1.22495	0.586195	0	287.086	10.4372	4.77889	0.0612574	0.851861
ENSG00000100413	POLR3H	5.25341	10.6884	4.65372	7.53257	9.06626	16.2297	753.897	1368.88	-0.860361	0.0614204	0.852214
ENSG00000163092	XIRP2	0.004521	0.265767	0.00410976	0.0039094	0.0397552	0.0303368	3.7994	23.5578	-2.6193	0.0616183	0.853606
ENSG00000092009	CMA1	0.377246	7.65148	0.285776	0.163106	1.16105	0.602712	10.2991	47.5259	-2.20085	0.0617755	0.853606
ENSG00000134539	KLRD1	0.758249	0.247863	0.520035	2.6344	0.422679	1.40504	178.386	449.625	-1.33445	0.0616625	0.853606
ENSG00000121039	RDH10	22.2876	12.2292	11.041	9.66018	16.3467	6.21948	1592.76	901.27	0.821504	0.0617708	0.853606
ENSG00000157554	ERG	9.04506	22.0916	4.66519	10.8224	8.6023	9.07248	1020.22	1919.8	-0.912018	0.0620064	0.85437
ENSG00000123213	NLN	1.73812	1.55946	3.68834	1.14004	1.34386	0.763443	446.645	228.453	0.967586	0.0621243	0.85437
ENSG00000006747	SCIN	2.11364	1.18139	5.58904	2.15643	1.54216	1.03007	647.494	305.92	1.08135	0.0620368	0.85437
ENSG00000111247	RAD51AP1	2.09582	1.33012	4.31282	1.4339	1.13412	0.551936	116.265	51.1125	1.18519	0.0621283	0.85437
ENSG00000130701	RBBP8NL	0.210932	0.152276	0.997074	0.51071	1.20563	0.141539	40.6219	13.5403	1.57899	0.0620582	0.85437
ENSG00000176204	LRRTM4	0.130676	0.190921	0.0197983	0.612074	0.0766062	0.0521942	7.40279	27.879	-1.92197	0.0622101	0.854911
ENSG00000156711	MAPK13	9.92938	4.84578	12.2259	8.41624	12.9566	8.31771	1522.73	935.869	0.702127	0.062358	0.856094
ENSG00000166546	BEAN1	0.686616	0.255251	0.885436	0.393518	0.259762	0.176027	81.451	36.6743	1.14821	0.0623814	0.856094
ENSG00000116014	KISS1R	0	0.144662	1.8489	0	0.0308363	0.0336156	19.0294	1.80478	3.42044	0.0624656	0.856666
ENSG00000162706	CADM3	16.9833	2.57436	0.821343	0.556179	0.552119	1.60012	425.536	109.663	1.95653	0.0625447	0.857164
ENSG00000137857	DUOX1	2.66934	2.67684	2.95085	6.73909	4.14015	9.68238	516.625	1010.89	-0.968442	0.0627623	0.857225
ENSG00000122694	GLIPR2	33.2074	25.8545	22.0002	40.4378	18.5684	71.7989	1358.14	2542.11	-0.904509	0.062662	0.857225
ENSG00000119929	CUTC	6.23058	7.03124	6.04933	10.2677	6.282	13.3837	202.003	333.908	-0.725404	0.0627612	0.857225
ENSG00000087586	AURKA	1.81086	1.05828	3.76783	1.77467	1.80468	0.945093	130.27	66.6585	0.965021	0.0626213	0.857225
ENSG00000181085	MAPK15	1.54223	0.636209	1.40195	0.516768	2.54278	1.47838	101.042	48.4564	1.06161	0.0627342	0.857225
ENSG00000104043	ATP8B4	1.10113	0.755209	1.24751	0.703573	0.891956	0.540771	212.087	130.864	0.696581	0.0628733	0.857576
ENSG00000143819	EPHX1	134.27	40.8687	91.4994	61.2214	66.0162	67.9356	4409.69	2569.57	0.779068	0.0629958	0.858665
ENSG00000171757	LRRC34	0.388626	0.288071	0.551993	0.273042	1.1854	0.419103	62.1463	28.6531	1.11943	0.0633254	0.861988
ENSG00000184574	LPAR5	2.15183	0.559466	3.36975	1.79818	1.51058	1.00537	138.057	66.0235	1.06115	0.0634282	0.862804
ENSG00000143919	CAMKMT	0.590461	0.867753	0.509914	1.12328	0.726905	1.24523	43.9445	77.8294	-0.824815	0.0637092	0.864286
ENSG00000106688	SLC1A1	11.1402	14.3157	9.05521	18.3106	13.6963	20.9624	816.496	1291.02	-0.661016	0.0636921	0.864286
ENSG00000123243	ITIH5	2.85947	8.85119	1.25575	3.34677	3.23693	3.03836	648.063	1343.02	-1.05115	0.063856	0.865694
ENSG00000197540	GZMM	6.73294	2.76465	7.76396	33.4771	4.87899	13.8048	110.334	284.986	-1.36985	0.0640756	0.865947
ENSG00000182010	RTKN2	11.7851	5.84799	6.88219	46.4722	12.2459	20.0688	1778.58	4164.88	-1.22761	0.0640913	0.865947
ENSG00000197930	ERO1A	10.7087	7.25264	10.8059	5.00794	6.35551	4.30963	1267.62	753.664	0.750226	0.0642887	0.865947
ENSG00000141198	TOM1L1	4.43772	1.85406	5.96275	3.41023	2.96232	2.33659	585.798	333.207	0.81335	0.0641391	0.865947
ENSG00000188997	KCTD21	3.04187	1.10893	3.21532	1.66386	1.36853	1.35625	191.341	103.604	0.88354	0.0639884	0.865947
ENSG00000185261	KIAA0825	1.28552	0.315383	0.185327	0.264437	0.448183	0.206288	120.298	49.2787	1.28673	0.0641071	0.865947
ENSG00000198515	CNGA1	0.329032	0.0848338	0.194417	0.0853561	0.188066	0.0788525	15.3535	5.37397	1.51099	0.0639433	0.865947
ENSG00000135451	TROAP	0.208595	0.230493	1.28671	0.206144	0.235834	0.157111	41.2465	14.1467	1.54538	0.064342	0.865947
ENSG00000259207	ITGB3	7.52169	2.1156	1.5357	0.579692	0.613077	0.321314	256.05	79.8725	1.68144	0.0643484	0.865947
ENSG00000197168	NEK5	0.135472	0.0523926	0.038484	0.0951802	0.699866	0.0973972	36.6374	10.2711	1.83383	0.0641928	0.865947
ENSG00000140254	DUOXA1	2.97653	2.38395	2.20205	4.32628	2.58955	8.51437	174.178	341.369	-0.971152	0.0644478	0.866413
ENSG00000204175	GPRIN2	4.49034	4.19872	6.23168	19.4662	5.97547	10.8759	198.013	409.614	-1.04905	0.0645687	0.86717
ENSG00000116748	AMPD1	0.0955763	1.26168	0.590801	0.47935	0.0840444	0.604687	14.308	43.5639	-1.60216	0.0646603	0.867536
ENSG00000117834	SLC5A9	2.52021	0.482312	0.625883	5.84135	1.14234	5.9276	117.191	334.793	-1.51542	0.0647169	0.867536
ENSG00000073910	FRY	2.78173	3.96801	1.62234	4.6865	3.87252	5.7346	940.065	1634.33	-0.797848	0.064889	0.868973
ENSG00000156413	FUT6	0.0541855	0	0.258598	0.058569	0.0952954	0.0129855	10.6943	1.87519	2.47712	0.0649191	0.868973
ENSG00000157765	SLC34A2	171.146	112.833	323.417	152.285	155.261	115.433	19754.9	11568.9	0.771952	0.0651642	0.871675
ENSG00000149435	GGTLC1	8.38327	6.74561	10.9705	28.4391	11.7462	29.4513	239.689	498.153	-1.05558	0.065303	0.871838
ENSG00000136492	BRIP1	0.117959	0.205289	0.944959	0.140252	0.226902	0.120143	62.1081	22.4238	1.47226	0.0652828	0.871838
ENSG00000183607	GKN2	13.2938	12.9014	0.93955	8.75252	5.95459	35.9754	201.086	574.029	-1.51374	0.0654011	0.872521
ENSG00000167105	TMEM92	2.58375	1.03843	3.67852	1.24853	1.15271	1.47514	138.557	70.2991	0.978108	0.0654675	0.872827
ENSG00000101134	DOK5	1.85518	1.88994	4.68909	0.332579	0.875353	0.238562	116.423	38.6175	1.59572	0.0657093	0.874891
ENSG00000141744	PNMT	4.28607	0.667212	1.87459	1.74823	0.995566	24.8455	62.8291	239.342	-1.93046	0.0658614	0.875932
ENSG00000171872	KLF17	0.0188161	0.0388106	0.0513137	0.276601	0.0165458	0.144297	1.6353	8.67327	-2.41089	0.0659928	0.87674
ENSG00000180440	SERTM1	1.28591	1.32618	0.317285	4.76551	1.63153	1.86662	62.5107	153.794	-1.29991	0.0661348	0.877071
ENSG00000073417	PDE8A	3.62324	11.734	4.4821	5.0194	4.36854	5.37099	592.757	1051.35	-0.826405	0.0661069	0.877071
ENSG00000171747	LGALS4	0.267281	0.206738	0.404948	1.5986	0.626752	1.79351	20.7036	57.3597	-1.46949	0.0662857	0.877575
ENSG00000267795	SMIM22	10.1644	1.13792	5.01502	2.74666	4.29258	4.96793	206.744	93.9918	1.13594	0.0662822	0.877575
ENSG00000104679	R3HCC1	8.78098	9.37937	6.61793	12.1644	7.62301	14.7305	364.851	574.874	-0.656304	0.0669346	0.881284
ENSG00000164904	ALDH7A1	4.24883	2.31942	3.35273	2.07515	2.90592	2.49844	1137.8	746.406	0.608156	0.0668908	0.881284
ENSG00000173715	C11orf80	4.27179	1.74286	3.68408	1.67782	1.83003	2.08497	222.016	124.908	0.829264	0.0668194	0.881284
ENSG00000033170	FUT8	6.11994	3.79057	7.42567	3.11743	2.98458	2.25897	667.376	370.099	0.850607	0.0666645	0.881284
ENSG00000009765	IYD	0.216049	0.39872	1.15771	0.353978	0.854917	0.245255	139.158	62.312	1.16026	0.0667792	0.881284
ENSG00000235961	PNMA6A	0.453384	0.247543	0.509118	0.115309	0.469035	0.204524	19.0553	7.55238	1.34497	0.0668943	0.881284
ENSG00000197275	RAD54B	0.0776195	0.08005	0.403195	0.0862959	0.234015	0.0850354	22.8855	8.04805	1.51001	0.0668323	0.881284
ENSG00000196711	ALKAL1	0	0.149773	2.99235	0.334878	0.468245	0.139213	25.3781	4.57508	2.4667	0.0667882	0.881284
ENSG00000189060	H1F0	58.4859	47.3829	100.849	37.4468	62.0599	51.8242	3127.1	1930.18	0.696163	0.0670449	0.882158
ENSG00000107281	NPDC1	18.8557	18.1142	10.2139	21.9632	12.7383	30.125	689.526	1157.83	-0.747999	0.0670941	0.882228
ENSG00000163694	RBM47	13.9009	7.57341	18.8794	11.2571	11.2838	8.58613	2268.63	1411.54	0.684422	0.0672586	0.882888
ENSG00000185681	MORN5	1.08596	0.279991	0	0.0586905	2.68574	0.325312	19.7276	3.47297	2.51586	0.0673649	0.883373
ENSG00000119669	IRF2BPL	25.1979	20.7545	19.8011	13.37	30.0087	11.5068	1878.9	1143.04	0.717181	0.0677704	0.885906
ENSG00000073111	MCM2	1.20182	1.43776	3.37583	1.03924	1.9234	0.967733	192.032	101.753	0.91757	0.0680247	0.886924
ENSG00000135378	PRRG4	8.94884	2.15345	6.6725	4.60609	3.26006	3.18624	629.183	331.422	0.924058	0.0679087	0.886924
ENSG00000203995	ZYG11A	0.125507	0.0258875	0.205364	0.0108529	0	0	9.3588	1.03921	3.18647	0.0680117	0.886924
ENSG00000137338	PGBD1	0.798179	2.60671	1.14019	1.75837	1.40375	1.60314	62.4311	111.487	-0.833716	0.0681024	0.887361
ENSG00000157456	CCNB2	1.00958	0.607363	2.40909	0.636565	0.425389	0.302432	64.8814	26.1001	1.31326	0.0682852	0.888591
ENSG00000103599	IQCH	0.314955	0.0769304	0.105481	0.0931716	0.298819	0.127122	30.8069	12.7306	1.27279	0.0683621	0.889017
ENSG00000250120	PCDHA10	0.0348278	0.0678459	0.351776	0.153928	0.541053	0.100158	85.1008	29.5331	1.52582	0.0684081	0.889039
ENSG00000196878	LAMB3	47.8921	10.77	16.2102	17.6693	15.8244	12.2875	2257.86	1150.5	0.97251	0.0685095	0.889782
ENSG00000214944	ARHGEF28	0.758248	2.26427	0.915606	1.27546	1.29703	1.4971	279.577	473.994	-0.760771	0.0687612	0.892475
ENSG00000184154	LRTOMT	1.08418	0.495864	0.505634	0.497287	1.01968	0.433791	98.2618	53.7322	0.870215	0.0689216	0.89398
ENSG00000196482	ESRRG	0.0647873	0.0612479	0.220853	0.0793656	0.156668	0.0310525	29.0835	11.2877	1.36456	0.0690888	0.894686
ENSG00000092853	CLSPN	0.32663	0.527744	1.56378	0.131807	0.344664	0.0626215	72.8763	23.547	1.63504	0.0691443	0.894686
ENSG00000168487	BMP1	3.50909	13.2397	4.387	4.98455	4.61814	5.02681	563.379	1046.74	-0.8934	0.0694128	0.89688
ENSG00000112769	LAMA4	10.5153	54.2754	7.20844	10.4307	12.7241	8.21619	2123.71	5086.27	-1.25998	0.0695954	0.898084
ENSG00000187210	GCNT1	1.96144	1.05083	3.6413	1.02426	1.91518	2.03895	419.087	229.338	0.869958	0.0695946	0.898084
ENSG00000067191	CACNB1	1.48653	0.659482	4.37101	1.60141	1.6431	1.37722	320.632	155.52	1.04314	0.0697423	0.899402
ENSG00000141665	FBXO15	0.471683	0.0486453	0.102907	0.106047	0.223977	0.135646	30.0512	10.9259	1.45249	0.0698991	0.900847
ENSG00000121454	LHX4	0.145801	0.0902197	0.19439	0.0420255	0.162398	0.0652234	18.3559	7.21207	1.35833	0.0700796	0.902017
ENSG00000151012	SLC7A11	0.323733	1.47407	0.28318	0.364447	0.134279	0.158092	43.0775	116.041	-1.42941	0.0705788	0.904621
ENSG00000110799	VWF	34.341	257.042	27.9497	36.9267	66.4127	36.6313	8058.7	20700.3	-1.36102	0.0708148	0.904621
ENSG00000173114	LRRN3	1.04904	0.548782	0.56664	4.87742	1.61765	2.71076	75.4986	189.999	-1.3321	0.0709209	0.904621
ENSG00000198844	ARHGEF15	2.18115	9.68638	2.58971	6.08164	5.33315	3.79766	322.326	624.161	-0.952836	0.0704045	0.904621
ENSG00000104967	NOVA2	0.651275	1.96603	0.462526	0.950348	1.03204	1.10555	112.289	210.461	-0.904975	0.0705808	0.904621
ENSG00000162694	EXTL2	1.3406	5.00241	1.59533	2.70841	2.86138	2.86226	168.869	307.982	-0.865644	0.0705974	0.904621
ENSG00000120832	MTERF2	2.46961	2.47992	1.86096	3.8917	2.31451	4.76588	145.193	243.351	-0.745821	0.0706764	0.904621
ENSG00000122952	ZWINT	2.57652	2.47835	6.84631	1.26394	1.87352	1.59115	161.871	76.4255	1.08431	0.0706553	0.904621
ENSG00000151006	PRSS53	0.139224	0.0552245	0.311532	0.0926074	0.169513	0.0923954	20.5608	7.96309	1.36485	0.0708255	0.904621
ENSG00000166897	ELFN2	0.147585	0.103777	1.57943	0.417664	1.10901	0.488731	150.08	53.4572	1.48844	0.0708668	0.904621
ENSG00000099960	SLC7A4	0.33706	0.0248296	1.42257	0.229006	0.804491	0.530815	37.8086	11.5699	1.70603	0.0709216	0.904621
ENSG00000184564	SLITRK6	7.8349	0.230864	0.107731	1.30945	1.04212	0.795232	242.226	62.9655	1.94217	0.0709569	0.904621
ENSG00000157470	FAM81A	0.443592	0.304988	0.499252	0.164392	0.325058	0.151867	42.6169	20.8814	1.03388	0.0711989	0.906557
ENSG00000117586	TNFSF4	2.67516	1.38717	2.16011	0.749547	0.80165	0.45844	133.899	61.645	1.11996	0.0713585	0.908014
ENSG00000186193	SAPCD2	0.658334	0.31579	1.23865	0.436884	0.350034	0.0440287	52.1027	18.4735	1.49323	0.0714951	0.909178
ENSG00000087303	NID2	1.50232	26.9476	2.65593	1.1636	4.14148	1.04254	319.683	1122.92	-1.81229	0.0715479	0.909273
ENSG00000105852	PON3	6.13922	3.77481	18.1873	7.31365	8.15544	5.85709	790.753	412.53	0.938508	0.071671	0.909687
ENSG00000205090	TMEM240	0.640361	2.11332	0.46569	1.25513	1.27635	1.80062	19.8113	42.9843	-1.11239	0.0720075	0.912775
ENSG00000185818	NAT8L	0.110381	0.217325	1.01252	0.104125	0.132358	0.057715	44.4084	13.414	1.7317	0.0719877	0.912775
ENSG00000178125	PPP1R42	0.104735	0	0.0238019	0.045283	0.552586	0.0501992	9.23476	1.29456	2.81763	0.0720505	0.912775
ENSG00000149679	CABLES2	2.0857	2.37574	3.25429	1.44014	3.62703	1.34285	204.518	117.659	0.799508	0.072315	0.914973
ENSG00000105767	CADM4	6.50511	4.30121	7.34405	3.67445	5.42038	4.50083	260.795	168.857	0.627437	0.0723629	0.915004
ENSG00000172292	CERS6	5.63015	4.2961	5.77627	1.32969	3.24094	1.942	639.11	330.207	0.953326	0.0724584	0.91506
ENSG00000184697	CLDN6	0.813063	0.0349384	0	0	0	0	8.52004	0.366118	4.55281	0.0724229	0.91506
ENSG00000126458	RRAS	104.368	57.3534	67.5431	175.842	78.2434	269.469	1748.57	3513.62	-1.00685	0.0725866	0.916104
ENSG00000064201	TSPAN32	1.00959	0.768885	0.94599	2.60559	1.07899	2.66514	69.358	138.042	-0.99413	0.0729454	0.9165
ENSG00000185340	GAS2L1	7.19159	19.0369	6.03547	6.0368	6.12735	10.2463	522.604	953.702	-0.867601	0.0730356	0.9165
ENSG00000067177	PHKA1	1.51226	1.263	2.70724	1.21943	1.46849	0.755953	217.646	123.914	0.812832	0.0728399	0.9165
ENSG00000115486	GGCX	4.09893	5.3225	11.2136	2.48053	6.18949	3.67473	1178.81	629.247	0.905981	0.0729986	0.9165
ENSG00000119714	GPR68	12.2571	2.55784	7.33554	4.02512	1.26431	2.06739	411.982	170.868	1.269	0.0729206	0.9165
ENSG00000176387	HSD11B2	2.90821	2.15857	0.881223	1.16213	5.88957	0.443514	155.959	60.6532	1.36396	0.0729719	0.9165
ENSG00000124237	C20orf85	4.76882	0.302655	0	0.634413	21.7413	1.40658	128.276	11.3403	3.49938	0.0727612	0.9165
ENSG00000105289	TJP3	2.27718	1.16704	8.82624	3.87783	5.36845	2.61144	418.567	194.554	1.10467	0.0731415	0.916776
ENSG00000119862	LGALSL	7.68241	24.7555	6.35481	13.6044	17.2381	19.7652	754.407	1402.06	-0.893875	0.0732669	0.917776
ENSG00000182272	B4GALNT4	0.344613	0.646189	1.63753	0.108361	0.702487	0.225236	60.8423	22.2051	1.46135	0.0733729	0.918531
ENSG00000118523	CTGF	180.064	569.057	74.3899	154.877	230.697	287.417	6837.94	14254.4	-1.05976	0.073762	0.921423
ENSG00000115756	HPCAL1	17.2196	12.5471	11.3343	30.9646	15.9144	37.3868	1671.26	3040.42	-0.863413	0.0739466	0.921697
ENSG00000134490	TMEM241	3.23325	1.6614	2.58851	1.8639	2.23461	1.66388	252.102	162.381	0.633739	0.073933	0.921697
ENSG00000002726	AOC1	2.60364	0.317772	0.574197	0.53288	0.108379	0.132915	75.7238	22.6642	1.7368	0.073862	0.921697
ENSG00000162981	FAM84A	0.927546	3.10892	1.23921	1.4583	1.24198	1.44823	172.212	303.904	-0.818317	0.0740657	0.922037
ENSG00000008056	SYN1	0.169557	0.127175	0.294255	0.119961	0.487959	0.132985	21.92	8.75447	1.3286	0.0741139	0.922067
ENSG00000176749	CDK5R1	2.88777	0.590019	1.2011	1.14254	1.00615	0.796514	132.785	65.9123	1.00734	0.0742149	0.922753
ENSG00000100373	UPK3A	0.50449	0	3.77072	0.630127	0.197164	0.268669	28.3242	5.69222	2.30317	0.074285	0.923053
ENSG00000121691	CAT	38.6956	35.3209	32.7293	64.8925	38.7599	85.4034	2383.61	4015.4	-0.752442	0.0743517	0.923311
ENSG00000131398	KCNC3	0.694532	0.958266	2.35479	0.673618	1.32876	0.602799	165.597	84.5251	0.971717	0.0744024	0.92337
ENSG00000108691	CCL2	235.979	64.9798	36.2962	66.2058	91.0369	30.7679	4347.88	1938.15	1.16559	0.0744677	0.92361
ENSG00000177888	ZBTB41	2.27066	2.33466	4.02815	1.88018	2.96478	1.35216	477.939	287.22	0.735123	0.0746499	0.925049
ENSG00000164972	C9orf24	3.11147	0.337779	0.148865	0.318617	13.6803	3.25737	146.895	33.937	2.11439	0.0746757	0.925049
ENSG00000134240	HMGCS2	0.481205	0	0.124981	2.39757	0.241797	1.31795	13.1373	57.5624	-2.13537	0.0747981	0.925425
ENSG00000135108	FBXO21	5.71413	10.4047	6.77425	10.3001	8.16325	9.91487	864.758	1282.15	-0.568029	0.0747527	0.925425
ENSG00000154127	UBASH3B	5.51147	8.27997	2.95378	4.2401	3.62767	8.45451	656.632	1138.9	-0.794519	0.0749224	0.925824
ENSG00000179750	APOBEC3B	0.776809	0.448635	1.66651	0.24182	0.601113	0.595719	34.7827	14.6945	1.24769	0.0748882	0.925824
ENSG00000122515	ZMIZ2	9.07901	5.52195	10.2088	6.80263	7.62357	5.79439	1190.12	801.287	0.570528	0.0750432	0.926746
ENSG00000024526	DEPDC1	0.139699	0.123492	0.580535	0.0949148	0.0877455	0.0095654	28.7452	8.11046	1.8277	0.0751379	0.927346
ENSG00000108556	CHRNE	0.946232	3.01244	0.467479	1.20955	0.777798	0.690152	37.8211	84.7738	-1.16378	0.0752401	0.928038
ENSG00000196196	HRCT1	2.6666	2.94196	1.29658	7.77556	2.12673	2.4373	34.862	75.3055	-1.11484	0.0753399	0.9287
ENSG00000185246	PRPF39	4.84971	6.33203	4.38685	6.71395	4.25406	6.50391	400.934	581.012	-0.535441	0.0755195	0.930343
ENSG00000174123	TLR10	0.558816	0.172894	1.33346	0.50738	0.28255	0.160704	55.2645	21.3701	1.36517	0.0755689	0.930381
ENSG00000100350	FOXRED2	2.14441	2.3205	2.69836	1.26057	3.25116	1.05313	272.006	155.738	0.806016	0.0757911	0.931975
ENSG00000117281	CD160	0.222538	0.0612017	0.161836	1.35986	0.260916	0.568866	15.4409	47.6162	-1.62754	0.0759092	0.932019
ENSG00000143401	ANP32E	16.7997	12.1347	27.7651	15.3607	17.7186	12.0154	1352.99	858.302	0.656516	0.0759337	0.932019
ENSG00000153944	MSI2	1.79655	1.89524	2.51827	0.939223	1.99222	0.694128	816.315	456.702	0.838356	0.076118	0.933142
ENSG00000188677	PARVB	4.59973	6.01588	3.42898	4.95464	2.61719	5.75192	474.907	745.977	-0.651756	0.0761916	0.933474
ENSG00000142546	NOSIP	9.06997	9.4827	8.40884	13.5633	6.43904	14.0122	612.244	948.608	-0.632025	0.0762949	0.933764
ENSG00000181322	NME9	0.141846	0.0650165	0.114616	0.109028	0.69295	0.120865	21.3851	6.64272	1.6864	0.0763081	0.933764
ENSG00000135679	MDM2	6.00485	5.53884	15.8236	6.0477	6.91825	4.52762	2301.1	1289.9	0.835079	0.0763672	0.933919
ENSG00000187609	EXD3	1.8618	2.26269	1.17277	2.298	1.71189	2.94738	218.115	345.019	-0.661892	0.0765316	0.934471
ENSG00000141933	TPGS1	2.53964	3.65349	2.42627	3.74871	2.95866	4.71393	173.914	265.902	-0.612289	0.0766119	0.934471
ENSG00000048392	RRM2B	22.6818	11.6303	16.9795	11.6982	12.1202	9.22234	1731.13	1088.22	0.669621	0.0766912	0.934471
ENSG00000108439	PNPO	2.42372	1.47651	4.57046	1.79364	2.05198	1.94515	284.873	164.235	0.79436	0.0766772	0.934471
ENSG00000131370	SH3BP5	10.0007	17.0192	5.51124	9.08872	6.19069	10.8087	543.899	925.186	-0.766462	0.0768276	0.935
ENSG00000196787	HIST1H2AG	1.15208	0.108014	0.285623	0.362264	0.391415	0.150598	24.7995	8.41792	1.54424	0.0768093	0.935
ENSG00000168676	KCTD19	0.0159592	0.0658355	0.0507762	0.151802	0.0561343	0.145335	5.46632	16.1482	-1.55645	0.0775926	0.936104
ENSG00000122852	SFTPA1	1780.4	632.914	1530.77	4204.69	1363.33	5722.9	69039.3	155972	-1.1758	0.0778821	0.936104
ENSG00000114378	HYAL1	6.58353	3.20085	2.61616	11.5322	4.3667	13.6497	256.038	535.666	-1.06555	0.0773021	0.936104
ENSG00000066405	CLDN18	81.7193	120.702	17.1705	107.257	94.1168	175.71	4512.55	9437.88	-1.06453	0.0774436	0.936104
ENSG00000138639	ARHGAP24	2.33924	4.25644	2.32286	3.50445	2.77105	3.31361	354.207	527.726	-0.574829	0.0771883	0.936104
ENSG00000125503	PPP1R12C	14.389	17.0493	9.96086	16.6229	11.5599	19.8091	1671.8	2489.86	-0.574729	0.0773277	0.936104
ENSG00000159082	SYNJ1	1.97107	1.95751	3.58356	1.66655	2.72185	1.53257	402.473	250.759	0.683139	0.0770574	0.936104
ENSG00000109586	GALNT7	5.13184	4.43405	5.64017	2.91635	4.7164	2.15531	640.716	393.227	0.70472	0.0777251	0.936104
ENSG00000156802	ATAD2	3.59207	2.39003	9.45741	2.52641	2.7802	3.33227	678.966	353.804	0.940431	0.0778561	0.936104
ENSG00000183044	ABAT	1.06411	0.80437	3.48455	1.15543	2.59982	1.72714	419.729	216.482	0.955303	0.0775198	0.936104
ENSG00000162643	WDR63	0.420487	0.154876	0.0546055	0.168816	1.18849	0.201539	39.3261	12.4161	1.66415	0.0776401	0.936104
ENSG00000143320	CRABP2	16.0137	10.605	25.0732	2.26929	2.16639	0.770102	286.701	90.4411	1.66565	0.0779427	0.936104
ENSG00000161911	TREML1	9.77252	0.737453	1.30004	1.82063	0.209595	0.571215	100.821	27.9645	1.84691	0.0775962	0.936104
ENSG00000112706	IMPG1	0.077497	0.0479542	0.154985	0.0134026	0.0954051	0	7.51	1.40533	2.44759	0.0778836	0.936104
ENSG00000126562	WNK4	0	0.0238782	0.315707	0.020021	0.111978	0.0332919	13.1152	2.3671	2.47488	0.0777451	0.936104
ENSG00000224982	TMEM233	0.711603	5.31101	0.68092	0.518178	0.889214	0.592386	43.2556	121.736	-1.49108	0.0786044	0.940419
ENSG00000078596	ITM2A	39.1797	27.076	11.8545	52.9553	14.8772	48.8194	814.6	1592.47	-0.967404	0.0786294	0.940419
ENSG00000104881	PPP1R13L	2.80985	2.81332	5.75773	3.5636	7.92723	2.96287	500.156	283.202	0.82069	0.0786856	0.940532
ENSG00000149177	PTPRJ	8.42667	3.89053	10.5216	7.7633	8.05077	5.00753	1565.1	965.836	0.696132	0.0789838	0.943027
ENSG00000151498	ACAD8	9.08252	2.53229	3.65788	3.28781	4.37605	3.85731	739.934	418.349	0.822288	0.0789882	0.943027
ENSG00000115525	ST3GAL5	4.81978	2.0553	10.1707	4.44248	3.35567	3.15975	1803.97	949.623	0.925588	0.0790377	0.943058
ENSG00000146109	ABT1	8.63022	12.2793	7.82703	11.9542	10.2415	15.8947	474.443	713.087	-0.58771	0.0793292	0.945415
ENSG00000165480	SKA3	0.521869	0.219271	0.896087	0.150423	0.0849819	0	27.6041	6.79009	2.02539	0.0794236	0.945978
ENSG00000198759	EGFL6	13.943	47.194	9.7577	10.7475	7.71014	10.2897	493.445	1071.87	-1.1191	0.079757	0.948109
ENSG00000169583	CLIC3	23.9257	15.796	10.8292	50.3807	29.6217	67.9417	456.585	951.224	-1.05902	0.0801573	0.951898
ENSG00000167549	CORO6	1.17254	0.717115	0.421395	1.68593	0.68338	2.3264	59.2959	123.144	-1.05677	0.080532	0.952409
ENSG00000227051	C14orf132	3.24307	8.19744	2.31437	6.5391	8.01561	11.3239	635.91	1220.95	-0.94089	0.0805291	0.952409
ENSG00000004534	RBM6	8.80229	14.0537	7.43688	11.5045	9.58484	12.1502	1136.27	1659.2	-0.546091	0.080268	0.952409
ENSG00000091490	SEL1L3	22.947	17.2482	33.1667	18.6454	19.7217	11.0852	3422.26	2120.04	0.69084	0.0804574	0.952409
ENSG00000109805	NCAPG	0.574646	0.469173	1.34947	0.269158	0.252656	0.14919	64.5482	26.3178	1.29675	0.0803889	0.952409
ENSG00000215217	C5orf49	2.44545	0.815201	0.471548	0.662157	5.90816	1.82327	126.832	47.4355	1.41969	0.0804134	0.952409
ENSG00000188580	NKAIN2	0.0701849	0.101336	0.178642	0	0.308583	0.0269117	14.0972	3.24343	2.14847	0.0805933	0.952574
ENSG00000135063	FAM189A2	2.54106	3.45389	1.90625	6.12792	4.02964	4.8599	487.923	831.248	-0.768666	0.0806584	0.952584
ENSG00000105926	MPP6	2.23856	0.940325	1.09178	0.755804	0.818352	0.530443	234.219	125.704	0.897411	0.0806889	0.952584
ENSG00000132170	PPARG	8.30111	9.07015	5.38496	9.627	7.41377	15.1801	576.599	925.772	-0.683208	0.0812223	0.957033
ENSG00000135503	ACVR1B	13.0147	10.1762	10.8144	3.59916	10.3155	5.76651	1170.72	670.032	0.805457	0.0812562	0.957033
ENSG00000160957	RECQL4	0.876188	1.00403	5.48692	1.34694	1.17405	0.866577	192.39	82.1294	1.22789	0.0813663	0.957769
ENSG00000154764	WNT7A	1.46672	0.663441	0.444434	4.29442	1.14267	2.20766	84.2622	197.713	-1.23199	0.0814464	0.957977
ENSG00000188243	COMMD6	10.4933	11.1994	7.13565	12.4853	11.6414	29.4359	510.969	927.32	-0.859836	0.0816046	0.957977
ENSG00000104267	CA2	23.2822	27.789	15.2868	48.8317	33.2352	45.6475	918.583	1564.16	-0.76795	0.0815658	0.957977
ENSG00000164087	POC1A	1.23227	1.1627	2.95538	1.15626	1.61386	0.703727	78.5529	40.9274	0.941319	0.0816698	0.957977
ENSG00000179776	CDH5	36.8861	70.8477	11.4998	32.4825	18.0576	27.9585	2435.1	4811.62	-0.982569	0.0817583	0.958455
ENSG00000181790	ADGRB1	0.248275	0.22301	0.684354	0.311644	0.661999	0.276382	70.6837	35.9501	0.975565	0.0818166	0.95858
ENSG00000112541	PDE10A	0.222041	1.45122	0.138616	0.286848	0.336396	0.117964	92.4997	246.297	-1.41203	0.0818878	0.958724
ENSG00000106258	CYP3A5	1.21156	0.620254	0.253549	1.74107	0.613167	2.34787	84.6455	191.799	-1.18182	0.0822934	0.958724
ENSG00000182916	TCEAL7	2.20236	7.33019	1.95653	2.16412	2.42079	3.55062	46.6659	92.5201	-0.984896	0.0822923	0.958724
ENSG00000168899	VAMP5	89.4848	104.379	119.337	157.184	66.7329	189.971	1359.91	2228.4	-0.712568	0.082205	0.958724
ENSG00000134138	MEIS2	0.992981	1.37856	0.729069	1.65125	1.35294	1.9665	200.08	325.095	-0.700174	0.0822439	0.958724
ENSG00000177054	ZDHHC13	2.32982	1.54967	2.35934	1.70621	2.08208	1.24399	316.749	210.497	0.589127	0.0822064	0.958724
ENSG00000129354	AP1M2	17.988	6.06482	21.2863	12.7243	15.022	13.4426	724.378	430.011	0.751916	0.0821103	0.958724
ENSG00000221955	SLC12A8	2.32025	1.96871	5.24422	0.930222	0.834667	0.818905	282.718	125.144	1.17656	0.0823535	0.958724
ENSG00000198286	CARD11	6.27056	0.942284	13.3687	6.43962	3.46687	2.25561	655.373	273.355	1.26082	0.0819358	0.958724
ENSG00000215595	C20orf202	0.624392	0.984855	0.300492	1.01633	0.387568	0.809791	12.6854	27.1693	-1.10454	0.0826037	0.958974
ENSG00000169976	SF3B5	94.1081	106.085	73.8787	111.737	78.6419	151.576	1029.9	1542.57	-0.58293	0.0833371	0.958974
ENSG00000119242	CCDC92	4.57091	6.2583	4.14211	7.69447	5.30461	6.54504	694.581	1015.68	-0.548292	0.0829991	0.958974
ENSG00000170430	MGMT	6.21098	8.2844	6.45904	9.08015	6.33544	10.066	407.362	587.943	-0.529414	0.0833896	0.958974
ENSG00000185129	PURA	3.2007	3.22114	5.13788	2.47923	3.7371	1.73802	886.656	546.163	0.699294	0.0833626	0.958974
ENSG00000123684	LPGAT1	10.5319	9.59118	11.1321	5.36703	10.0266	4.18469	1680.28	1014.98	0.727444	0.0825134	0.958974
ENSG00000145864	GABRB2	0.341628	0.157939	0.224883	0.183359	0.347024	0.169389	55.0592	30.7794	0.837445	0.083396	0.958974
ENSG00000276600	RAB7B	11.6676	3.11537	4.2425	4.00802	3.76661	3.34003	437.044	232.406	0.910396	0.0831146	0.958974
ENSG00000142207	URB1	2.41595	3.23378	5.57926	1.48016	3.1686	1.10869	770.997	402.124	0.939596	0.0826265	0.958974
ENSG00000121236	TRIM6	0.731378	0.815853	3.59562	0.813132	0.905635	0.729714	124.453	56.0993	1.15004	0.0830978	0.958974
ENSG00000204815	TTC25	1.34322	0.53467	0.4927	0.835471	2.83891	0.67769	70.4245	30.8498	1.18988	0.0826394	0.958974
ENSG00000186976	EFCAB6	0.227198	0.0852046	0.118912	0.119068	0.593302	0.184793	48.4391	20.0615	1.27213	0.0830957	0.958974
ENSG00000100285	NEFH	0.342609	0.385459	1.47228	0.175063	0.246495	0.223926	46.9909	17.8821	1.39836	0.0833905	0.958974
ENSG00000197614	MFAP5	7.85813	1.17566	0.884282	0.499445	0.173752	1.00534	208.248	62.605	1.73406	0.0831503	0.958974
ENSG00000146221	TCTE1	0.0384175	0	0.0698459	0.116271	0.92901	0.0736539	19.1701	3.51005	2.43788	0.0834243	0.958974
ENSG00000080572	PIH1D3	0.244073	0.062929	0.027734	0	0.912154	0.14623	13.7765	2.43376	2.51419	0.0828962	0.958974
ENSG00000185942	NKAIN3	1.14844	0	0	0	0	0	20.2351	0	6.76536	0.0836693	0.961241
ENSG00000180720	CHRM4	0.0779791	0.281473	0.283544	0.708015	0.239997	0.784882	5.47687	16.1557	-1.55525	0.0839255	0.962401
ENSG00000120798	NR2C1	2.83332	3.23844	2.81347	5.90659	3.35633	5.0428	354.207	558.188	-0.656447	0.0840349	0.962401
ENSG00000133216	EPHB2	1.42623	1.51943	2.86684	0.7937	1.20862	0.342924	414.935	200.318	1.05122	0.0840575	0.962401
ENSG00000186185	KIF18B	0.265774	0.430722	1.80624	0.131326	0.233707	0	64.6761	15.7656	2.04063	0.0839274	0.962401
ENSG00000136881	BAAT	0.0173837	0.250992	3.04986	0.0450959	0.473873	0	72.3153	6.04658	3.58461	0.0839892	0.962401
ENSG00000145623	OSMR	32.9303	20.1482	20.7902	8.76987	15.7278	9.90305	3002.21	1678.21	0.839175	0.0841395	0.9625
ENSG00000179456	ZBTB18	7.14922	6.14424	19.2774	7.08199	6.8304	4.82907	782.768	424.967	0.881211	0.0841619	0.9625
ENSG00000075275	CELSR1	3.90117	4.3507	8.84487	5.05615	11.2663	4.44084	1852.96	1068.58	0.794198	0.0844374	0.963171
ENSG00000142949	PTPRF	16.7192	13.3858	43.2504	21.9191	26.4006	14.3347	5575.1	3204.18	0.799016	0.0846038	0.963171
ENSG00000170525	PFKFB3	58.7205	48.5348	99.6195	46.4856	48.1107	20.4042	7606.06	4252.48	0.838846	0.0844432	0.963171
ENSG00000186364	NUDT17	1.88437	1.10002	3.65217	1.38349	1.50069	1.22696	70.2654	37.0484	0.922413	0.0845449	0.963171
ENSG00000137440	FGFBP1	4.50844	0.715325	1.6551	0.937148	0.648039	1.122	55.7809	22.7205	1.29222	0.0844517	0.963171
ENSG00000143028	SYPL2	0.104061	0.735903	0.135136	0.334223	0.274515	0.213755	12.2677	30.6596	-1.31337	0.0847234	0.963296
ENSG00000001617	SEMA3F	7.26344	23.996	7.1354	9.52153	7.60007	7.11485	639.744	1181.62	-0.884999	0.0847928	0.963296
ENSG00000102970	CCL17	1.52034	0.29399	4.3189	5.34084	46.9587	7.83351	197.254	50.318	1.97035	0.0848161	0.963296
ENSG00000145681	HAPLN1	1.3297	0.0349384	0.0307961	0.270975	0.126608	0.0568314	62.333	15.2047	2.02848	0.0848832	0.963296
ENSG00000259803	SLC22A31	25.5516	6.26203	17.7694	13.2921	28.3836	20.0581	1127.73	622.999	0.855938	0.0850903	0.964885
ENSG00000204021	LIPK	2.53854	0	0.13062	0	0	0	19.7832	0	6.7328	0.0851759	0.965311
ENSG00000125895	TMEM74B	4.69173	7.01053	1.69629	5.3479	6.16503	12.5981	167.17	332.349	-0.991197	0.0853803	0.967082
ENSG00000254521	SIGLEC12	2.73019	1.04898	3.77143	1.92108	1.41222	1.18029	104.96	55.0455	0.928396	0.0854452	0.967272
ENSG00000164466	SFXN1	4.91721	3.00099	4.06679	2.52968	2.79823	1.51403	537.596	321.433	0.741932	0.0855053	0.967408
ENSG00000158258	CLSTN2	0.298683	0.345499	0.315544	0.164041	3.30791	0.812522	344.964	116.28	1.56945	0.0856849	0.968894
ENSG00000214967	NPIPA7	2.22869	0.390308	0.267581	0.690881	1.18327	0.12093	31.0635	10.1485	1.60652	0.0858445	0.970154
ENSG00000188959	C9orf152	6.1572	2.49464	2.27156	2.02252	4.20135	2.64453	224.288	127.179	0.81833	0.0859496	0.970796
ENSG00000167874	TMEM88	7.60822	15.4846	2.14217	14.0895	11.6043	13.6829	112.595	228.077	-1.01809	0.0861459	0.971921
ENSG00000107679	PLEKHA1	2.45615	3.42723	2.2439	4.50899	2.85526	3.24916	1092.01	1616.69	-0.566119	0.0863138	0.973269
ENSG00000182600	SNORC	0.318622	0.0492899	0.564797	0.192863	0.0700446	0.0305431	21.2466	6.07664	1.79139	0.0865019	0.974297
ENSG00000187800	PEAR1	3.56888	12.1955	1.75286	3.83227	5.45217	5.56571	359.018	719.559	-1.00269	0.0867793	0.976328
ENSG00000131389	SLC6A6	9.35017	5.69744	11.3999	6.26454	8.26595	7.6015	1443.18	973.035	0.568646	0.0868754	0.976627
ENSG00000147119	CHST7	3.65473	25.057	2.94795	5.29686	9.73182	7.00684	225.304	515.322	-1.19289	0.0870689	0.976852
ENSG00000143839	REN	1.73274	0.175196	0.185309	0.352549	0.388388	0.195412	24.0995	7.55614	1.66307	0.0870427	0.976852
ENSG00000129116	PALLD	22.4551	15.2045	15.0592	11.2877	28.2433	15.2772	4007.62	2545.65	0.654763	0.0872945	0.977926
ENSG00000173198	CYSLTR1	3.90217	1.18877	4.97956	2.5147	2.10158	2.39237	368.71	204.637	0.848534	0.087263	0.977926
ENSG00000135447	PPP1R1A	0.133154	0.213614	0.793497	0.0767604	0.221166	0.113459	27.5418	9.68995	1.51603	0.0873105	0.977926
ENSG00000132704	FCRL2	1.07157	0.288294	1.11175	0.38273	0.153633	0.312629	71.2273	29.9805	1.24622	0.0874481	0.978377
ENSG00000091656	ZFHX4	0.108911	0.116194	0.279942	0.0292274	0.0693507	0.0108002	43.3128	14.7672	1.55988	0.0876853	0.979396
ENSG00000068745	IP6K2	8.39073	10.8898	8.32264	11.4224	7.76522	12.2307	829.563	1170.64	-0.496931	0.0878829	0.981058
ENSG00000167552	TUBA1A	67.5582	150.625	52.302	70.4808	48.2917	64.7117	3466.35	5891.96	-0.765313	0.088109	0.983036
ENSG00000105538	RASIP1	14.4976	30.357	4.00141	12.9415	11.1002	14.714	740.015	1450.38	-0.970816	0.0883193	0.98395
ENSG00000171368	TPPP	3.35557	9.57478	1.99206	3.39228	5.81537	8.62773	405.079	783.624	-0.951601	0.0883867	0.98395
ENSG00000127329	PTPRB	13.0369	9.16258	5.34733	16.9239	7.53456	20.0312	2271.21	4041.19	-0.831416	0.0883196	0.98395
ENSG00000176055	MBLAC2	0.819969	0.813532	1.89648	0.951373	1.63374	0.746223	148.788	85.8873	0.793148	0.0883454	0.98395
ENSG00000185972	CCIN	0.15176	0.406931	0.0551822	0.0787378	0.0533797	0.494621	3.04477	11.4656	-1.92081	0.0885103	0.984177
ENSG00000161281	COX7A1	23.7761	22.9503	7.34642	25.3198	18.1781	43.8432	298.86	558.391	-0.90213	0.0885743	0.984177
ENSG00000110318	CEP126	0.906246	0.593412	0.320372	0.503774	2.22627	0.482626	170.426	77.9758	1.12877	0.0886128	0.984177
ENSG00000171848	RRM2	0.686196	0.856067	2.54542	0.593366	0.652063	0.212189	124.571	53.2975	1.22597	0.0886518	0.984177
ENSG00000128268	MGAT3	3.04444	2.9505	1.99222	6.75884	5.27828	10.6077	339.186	668.084	-0.977918	0.0888652	0.984915
ENSG00000180914	OXTR	0.247973	0.107679	0.130505	0.0564282	0.390201	0.13762	20.9086	8.20717	1.35618	0.0888438	0.984915
ENSG00000135476	ESPL1	0.271703	0.382727	0.98193	0.097417	0.209784	0.069878	78.3949	29.4646	1.41629	0.0887956	0.984915
ENSG00000188290	HES4	27.7704	89.9413	12.0234	21.0062	30.9996	35.1069	476.927	983.953	-1.04463	0.0889315	0.984955
ENSG00000215251	FASTKD5	6.82606	8.75219	4.2672	7.99424	4.21794	7.09365	265.164	412.869	-0.639394	0.0890428	0.984955
ENSG00000155660	PDIA4	89.9069	63.2053	58.9801	31.4335	61.1479	30.779	4147.49	2476.59	0.74395	0.0890623	0.984955
ENSG00000127831	VIL1	0.204323	0.0351202	0.379214	0.058894	0	0.040805	24.3328	5.62181	2.10962	0.0891138	0.984955
ENSG00000155622	XAGE2	0.190658	0.196628	0.173315	0.906759	0.0838268	0.913821	1.66759	7.51202	-2.18559	0.0897747	0.986295
ENSG00000175874	CREG2	0.0576773	0.526852	0.0299605	0.0284998	0.0724545	0.0473909	6.89754	25.969	-1.90779	0.0896297	0.986295
ENSG00000136870	ZNF189	10.5024	17.7336	6.28675	10.8921	6.685	9.88667	485.604	796.694	-0.714326	0.0897364	0.986295
ENSG00000090530	P3H2	8.01976	9.35488	5.19778	11.5884	9.26112	14.781	759.214	1206.58	-0.668394	0.089507	0.986295
ENSG00000148219	ASTN2	0.604056	0.344466	0.394067	0.288822	0.443685	0.156683	72.0244	39.4624	0.867873	0.0895183	0.986295
ENSG00000135083	CCNJL	6.13506	2.63247	2.87283	1.44383	1.51325	1.21423	583.839	293.582	0.991873	0.0896559	0.986295
ENSG00000073150	PANX2	1.99416	1.05768	5.55916	2.00357	1.08553	0.873874	161.479	73.5561	1.13316	0.0897046	0.986295
ENSG00000171320	ESCO2	0.24384	0.175271	0.403018	0.108621	0.136449	0.0283327	37.6332	15.0005	1.33005	0.0897182	0.986295
ENSG00000188191	PRKAR1B	4.67003	5.66858	4.65068	7.6795	5.05246	7.79647	388.967	572.215	-0.557104	0.0902105	0.988382
ENSG00000276644	DACH1	2.40507	4.71272	0.775142	3.61113	2.23985	2.04351	176.007	336.662	-0.935815	0.0902868	0.98868
ENSG00000143869	GDF7	0.042301	0.0747867	0.252693	0.120186	0.536701	0.115856	48.8587	18.26	1.42029	0.0903694	0.989045
ENSG00000133561	GIMAP6	16.1548	12.6702	14.1516	30.5556	12.8023	28.8216	1016.47	1698.81	-0.74115	0.0904567	0.989131
ENSG00000153885	KCTD15	4.74036	9.70149	3.49596	5.74987	4.43602	4.95961	487.797	785.681	-0.687497	0.0904828	0.989131
ENSG00000167642	SPINT2	44.2161	17.1557	65.7712	42.2617	57.5245	39.42	5247.87	3096.42	0.761075	0.0905248	0.989131
ENSG00000166578	IQCD	1.00584	0.29638	0.609562	0.393465	2.40072	1.01011	59.5332	25.1994	1.24108	0.0906946	0.989408
ENSG00000162598	C1orf87	0.266455	0.0549597	0.0363327	0.184327	1.35897	0.229881	44.2797	12.5016	1.82282	0.0906337	0.989408
ENSG00000180739	S1PR5	1.97357	0.627933	1.62228	7.60701	0.756951	2.67679	73.5994	184.501	-1.32761	0.0911681	0.990839
ENSG00000108387	2020-09-04	3.4192	7.4317	2.07881	4.72428	5.49603	6.78084	530.782	914.252	-0.784211	0.0911743	0.990839
ENSG00000159063	ALG8	10.9523	4.21147	10.3754	5.80648	4.95813	5.73258	546.142	327.251	0.738361	0.0910546	0.990839
ENSG00000140993	TIGD7	0.772034	0.33296	0.421085	0.388417	0.715913	0.309484	48.2803	26.071	0.886738	0.0913218	0.990839
ENSG00000151338	MIPOL1	0.736051	0.270035	0.156035	0.266666	0.647242	0.231474	187.834	93.7354	1.00245	0.091286	0.990839
ENSG00000186047	DLEU7	0.435081	0.13295	0.629879	0.348354	0.396756	0.200811	32.2023	15.0273	1.09128	0.0910681	0.990839
ENSG00000189280	GJB5	2.6087	0.224199	0.0395235	0.0751931	0.15293	0.291748	22.8715	4.82667	2.2463	0.0909715	0.990839
ENSG00000138835	RGS3	4.15165	15.717	4.82234	4.16618	4.42819	5.4169	1113.91	2102.8	-0.916535	0.0917143	0.992566
ENSG00000162882	HAAO	2.00988	5.1486	2.73076	3.92447	3.47774	4.01907	134.999	215.057	-0.67024	0.0916492	0.992566
ENSG00000126003	PLAGL2	5.3595	4.41973	4.89077	2.98249	5.30309	2.94002	534.684	355.54	0.589191	0.0917659	0.992566
ENSG00000143315	PIGM	1.86641	1.62274	3.40088	1.63563	2.40662	1.64472	325.496	207.969	0.646596	0.0917242	0.992566
ENSG00000065361	ERBB3	3.82587	3.71713	26.9105	8.87099	10.9467	6.55397	2270.38	1042.62	1.12265	0.0918051	0.992566
ENSG00000185668	POU3F1	0.620423	0.111278	0.367818	0.16328	0.166042	0.129291	15.1909	5.31483	1.5054	0.0918664	0.992566
ENSG00000197457	STMN3	25.9785	10.3601	9.2731	8.821	13.4126	9.0895	889.113	516.514	0.783419	0.0922115	0.993522
ENSG00000113578	FGF1	4.19931	0.886893	0.974638	1.33274	0.874055	0.342592	192.244	81.4436	1.23746	0.0921635	0.993522
ENSG00000111834	RSPH4A	0.726043	0.70599	0.358286	0.556072	3.7212	0.596558	82.239	31.8073	1.37229	0.0921667	0.993522
ENSG00000174749	FAM241A	3.23655	9.68605	1.97948	3.54274	4.13811	4.00985	501.719	924.612	-0.881696	0.0926467	0.997179
ENSG00000185842	DNAH14	0.355998	0.191286	0.451431	0.186255	0.147315	0.131915	113.297	60.4556	0.905563	0.0927246	0.997447
ENSG00000184985	SORCS2	2.93773	2.08714	1.44971	1.2258	3.34596	1.04598	294.374	165.924	0.827903	0.0927898	0.997615
ENSG00000196584	XRCC2	0.400605	0.400629	0.926966	0.0839783	0.202822	0.0814587	44.7539	16.5537	1.44244	0.0929514	0.998818
ENSG00000112877	CEP72	1.67495	0.664384	1.43475	0.919153	0.991347	0.849119	90.3976	53.6219	0.750649	0.0930899	0.998903
ENSG00000155330	C16orf87	1.02898	1.01222	2.93567	0.88978	0.939631	0.675292	219.959	115.593	0.928596	0.0930286	0.998903
ENSG00000173947	PIFO	1.94949	1.11221	0.691267	1.02819	5.5197	1.51092	209.529	93.7519	1.16076	0.0931084	0.998903
ENSG00000127528	KLF2	110.032	95.0209	103.765	206.298	87.745	183.163	3666.79	5891.37	-0.684142	0.0934663	0.999011
ENSG00000100650	SRSF5	70.5815	74.7878	35.9095	80.9464	56.7273	100.667	5268.76	8276.73	-0.651625	0.0932015	0.999011
ENSG00000124766	SOX4	7.48999	10.7977	24.1873	7.92181	11.9243	3.09778	1537.54	769.349	0.999028	0.0932579	0.999011
ENSG00000127328	RAB3IP	1.40136	1.21882	5.93208	1.80556	1.66768	1.4732	684.067	341.807	1.00087	0.0934451	0.999011
ENSG00000102962	CCL22	0.945347	0.29041	4.31507	2.41759	3.02446	0.308496	146.226	53.2403	1.4548	0.0934199	0.999011
ENSG00000154839	SKA1	0.519235	0.329535	0.780623	0.138151	0.17561	0.0765751	26.2283	9.67492	1.44546	0.0935227	0.999083
ENSG00000037280	FLT4	4.2927	14.1187	3.30933	5.99672	8.20499	8.43412	843.159	1522.86	-0.852669	0.0936311	0.99971
ENSG00000189001	SBSN	0.0593285	0.856608	0	0	0.0521702	0.0284361	1.33434	10.5916	-2.98919	0.112102	0.999988
ENSG00000064218	DMRT3	0.0493617	0.916333	0	0	0.0868118	0	1.95868	13.1802	-2.74547	0.177886	0.999988
ENSG00000170891	CYTL1	0.176211	50.2783	2.29595	1.42215	6.3013	2.87157	53.0261	329.829	-2.63621	0.116091	0.999988
ENSG00000168539	CHRM1	0.326289	0	0	0.924818	0	0.955716	6.39003	36.8284	-2.52905	0.464975	0.999988
ENSG00000184999	SLC22A10	0.0920519	0.0569606	0	0.350236	0	0.0705927	1.77501	9.21306	-2.40994	0.140572	0.999988
ENSG00000197632	SERPINB2	0.75035	10.0379	0.0779539	0.166845	1.20652	0.102755	33.6947	170.682	-2.34035	0.201543	0.999988
ENSG00000164107	HAND2	0.0327205	0.303705	0.0148721	0.014147	0.0287725	0.0627316	1.65705	8.25832	-2.31186	0.107849	0.999988
ENSG00000241945	PWP2	0.025533	0.28088	0.0232105	0.00735963	0.0149682	0.0244759	2.65747	13.0437	-2.29182	0.0945965	0.999988
ENSG00000183638	RP1L1	0	0.177875	0.0180906	0	0.0349994	0.0699488	2.84114	13.2624	-2.20762	0.162074	0.999988
ENSG00000185742	C11orf87	0.0100124	0.010326	0.0364068	0.190475	0	0.00959791	1.64584	7.45991	-2.18813	0.204032	0.999988
ENSG00000240654	C1QTNF9	0	1.73319	0.0848722	0	0.301033	0	4.40199	19.7704	-2.16477	0.543341	0.999988
ENSG00000104938	CLEC4M	0.434677	0.0298859	0.0131713	1.17774	0	0.722247	10.9728	47.2839	-2.11472	0.142974	0.999988
ENSG00000165566	AMER2	0.0388866	0	0	0.0912705	0	0.0692281	2.48501	10.2565	-2.0641	0.276738	0.999988
ENSG00000182759	MAFA	0.282332	0.897781	0	0.305172	0.0413778	0.135321	4.88436	20.1928	-2.05947	0.101941	0.999988
ENSG00000100312	ACR	0.0858376	1.0328	0.0780297	0.0247418	0.100641	0.0274279	3.28181	13.4614	-2.02936	0.155844	0.999988
ENSG00000139914	FITM1	0.130435	0.358719	0	0.451159	0.114697	0.166713	2.00151	7.97388	-2.00355	0.122688	0.999988
ENSG00000179314	WSCD1	0.305464	13.5037	0.345221	0.385502	3.18699	1.28998	165.022	652.709	-1.9835	0.203801	0.999988
ENSG00000205810	KLRC3	0.256591	0	0.0466501	0.576885	0	0.590322	2.09772	8.07435	-1.96661	0.251598	0.999988
ENSG00000124003	MOGAT1	0.281074	0.0579752	0	0.19444	0.0988644	1.18553	2.39935	9.08072	-1.93409	0.206432	0.999988
ENSG00000176402	GJC3	0.316738	0.108885	0.0479878	0.821667	0.139261	0.961477	3.38923	12.7236	-1.92442	0.0989134	0.999988
ENSG00000108576	SLC6A4	21.5051	0.252324	1.23475	47.8355	0.356099	39.4259	971.84	3682.45	-1.92193	0.314468	0.999988
ENSG00000260729	AC009690.1	0.0404069	0.111126	0	0.232937	0.0829069	0.116202	3.25019	12.1312	-1.8988	0.10208	0.999988
ENSG00000223802	CERS1	0.0627905	0.485675	0	0.013574	0.0828217	0.0451432	3.29302	12.3114	-1.89733	0.2104	0.999988
ENSG00000204065	TCEAL5	0.151318	2.54892	0.229257	0.174464	0.354829	0	5.17591	19.1677	-1.88162	0.183694	0.999988
ENSG00000081248	CACNA1S	0.0955143	0	0.104191	0.644225	0	0.0732479	7.42254	26.6666	-1.85031	0.235491	0.999988
ENSG00000113763	UNC5A	1.40559	7.77769	0.0737156	0.0701216	0.74873	0.142513	58.5231	209.879	-1.84254	0.319275	0.999988
ENSG00000181009	OR52N5	0	0	0.0960444	0.475081	0.0371628	0	2.23789	7.98139	-1.83418	0.382492	0.999988
ENSG00000185518	SV2B	0.0378437	3.34183	0.25371	0.351785	0.782025	0.122435	80.5676	286.379	-1.82843	0.0974413	0.999988
ENSG00000275152	CCL16	0	0.418059	0.0614155	0.321317	0.207933	0.226674	2.8306	10.1523	-1.82211	0.133677	0.999988
ENSG00000142748	FCN3	119.648	1.20563	15.3719	244.773	0.525939	223.421	1769.96	6129.41	-1.79207	0.36718	0.999988
ENSG00000185640	KRT79	0.0927037	0.0478033	0.0210678	0.30061	0.0611388	0.244381	2.67922	9.08023	-1.77584	0.138322	0.999988
ENSG00000243772	KIR2DL3	0.0370523	0.0382126	0	0.608757	0.358399	0.710366	3.78886	13.0048	-1.77233	0.225614	0.999988
ENSG00000151704	KCNJ1	0.012705	0.0655143	0.0346481	0.131835	0.0335163	0.0730741	2.25964	7.55614	-1.73586	0.13317	0.999988
ENSG00000178997	EXD1	0.0160921	0	0	0.208727	0.0990535	0.169685	2.54018	8.348	-1.7117	0.314632	0.999988
ENSG00000088882	CPXM1	3.05531	68.0509	11.0648	1.17185	7.32333	0.921159	308.952	1010.62	-1.70969	0.302518	0.999988
ENSG00000164106	SCRG1	0.0655076	0.225196	0.00992482	0.00944095	0.00960062	0.0418637	2.76489	8.99055	-1.70926	0.236492	0.999988
ENSG00000122679	RAMP3	75.9638	0.681239	22.2549	186.209	7.29699	158.104	907.316	2966.56	-1.70917	0.303844	0.999988
ENSG00000285188	AC008397.2	0.0394134	0.0508095	0.0268712	0.0766834	0.017329	0.141681	3.01247	9.69794	-1.69716	0.107391	0.999988
ENSG00000164933	SLC25A32	0.0644917	0.216161	0.0732818	0.195185	0.0141776	0.0772771	3.34573	10.7587	-1.69258	0.112008	0.999988
ENSG00000140067	FAM181A	0.0267544	0.165553	0.121604	0.647781	0.541105	1.41057	9.14843	29.5088	-1.68291	0.119935	0.999988
ENSG00000186326	RGS9BP	0.0814281	0.104972	0.0185053	0.45768	0.196909	0.390284	5.17657	16.6181	-1.68121	0.106425	0.999988
ENSG00000186453	FAM228A	0.0780307	0.536494	0	0.0224915	0.11436	0.0498668	2.62585	8.30994	-1.65412	0.295532	0.999988
ENSG00000150201	FXYD4	0.142475	0.0734679	0	0.0616002	0.31321	1.29747	2.27085	7.13888	-1.64776	0.325122	0.999988
ENSG00000167754	KLK5	0.0356402	1.35998	1.29593	14.0842	3.72946	0.409976	50.4115	157.918	-1.6471	0.346878	0.999988
ENSG00000205809	KLRC2	0.275112	0.202662	0.142907	1.3594	0.138239	0.150698	5.02453	15.4709	-1.63538	0.135994	0.999988
ENSG00000179915	NRXN1	0.0121121	0.00749481	0.00440414	0.0188524	0.00213014	0.0301876	2.7326	8.2851	-1.62044	0.176364	0.999988
ENSG00000157150	TIMP4	0.21423	3.6823	0.421943	0.339622	0.753527	0.239587	13.8173	42.3707	-1.61048	0.121087	0.999988
ENSG00000164530	PI16	1.09007	0.613201	0.090083	0.642683	2.2003	9.00071	48.44	146.971	-1.60083	0.148079	0.999988
ENSG00000124743	KLHL31	0.0205165	0.021159	0.0373006	0.230633	0.0451027	0.0590014	3.56169	10.7555	-1.59753	0.172318	0.999988
ENSG00000158022	TRIM63	0.0228967	0.212523	0.353838	1.58394	0.281877	0.197539	10.2114	30.9159	-1.59673	0.142337	0.999988
ENSG00000114812	VIPR1	15.5421	0.625353	1.98726	20.2214	1.5505	35.8852	848.955	2524.28	-1.57219	0.295469	0.999988
ENSG00000135406	PRPH	0.0135339	0.0139577	0.0369086	0.222358	0.130911	0.298393	4.75699	14.0257	-1.55353	0.20848	0.999988
ENSG00000178084	HTR3C	0.972051	0	0.0315583	1.77116	0	1.16476	10.2628	30.0223	-1.5511	0.559508	0.999988
ENSG00000269067	ZNF728	0	0.27718	0.195454	0.162684	0.0236337	0.20611	2.89385	8.53245	-1.54905	0.246994	0.999988
ENSG00000182223	ZAR1	0	0.124845	0.220086	0.279142	0.106449	0.541533	2.87277	8.31843	-1.52395	0.243298	0.999988
ENSG00000221946	FXYD7	0.0328207	0.270788	0.149176	0.42571	0.115443	0.15731	3.21723	9.23512	-1.51424	0.162271	0.999988
ENSG00000165376	CLDN2	0.086383	7.62593	0.204166	0.672273	2.6738	0.115929	60.9119	172.895	-1.50437	0.401387	0.999988
ENSG00000058404	CAMK2B	0	0.0595739	0.0328192	0.174827	0.0571448	0.0207651	4.42307	12.5452	-1.49765	0.238774	0.999988
ENSG00000198574	SH2D1B	1.1374	0.304116	0.248912	2.87774	0.148173	1.09031	25.8627	72.0044	-1.48309	0.111788	0.999988
ENSG00000151655	ITIH2	0.104642	0.0179864	0.0475616	0.723884	0.199368	0.234055	7.15633	19.8653	-1.47595	0.198953	0.999988
ENSG00000163395	IGFN1	0.0777989	0.411204	0.0442013	0.0252278	0.0470332	0.0326278	12.341	34.2457	-1.47061	0.160705	0.999988
ENSG00000285791	AC009879.3	0	0.0364621	0.0535651	0.0917164	0.0414523	0.135565	2.86223	7.94479	-1.46213	0.254713	0.999988
ENSG00000175779	C15orf53	0.00695634	0.00717416	0.044265	0.126321	0	0.00666834	2.61397	7.15293	-1.45813	0.395159	0.999988
ENSG00000167434	CA4	12.5166	2.68197	1.03839	16.1195	2.35089	24.7657	232.332	636.369	-1.45429	0.108992	0.999988
ENSG00000159723	AGRP	1.77357	0.159052	1.12156	2.86723	2.30546	11.1618	23.9421	65.3182	-1.44807	0.158612	0.999988
ENSG00000213809	KLRK1	0.155546	0.0401043	0.30047	0.807023	0.102584	0.67098	10.1991	27.7181	-1.44559	0.146676	0.999988
ENSG00000188803	SHISA6	0.0345451	0.456023	0.0628056	0.0298718	0.0850557	0.013246	9.37247	25.647	-1.44543	0.221425	0.999988
ENSG00000162975	KCNF1	0.849339	2.6278	0.0467928	0.15579	0.248954	0.320736	15.7943	42.8185	-1.44044	0.209638	0.999988
ENSG00000149654	CDH22	0.0119524	0.0616331	0.0325955	0.0826835	0.042041	0.0916602	2.57181	7.00884	-1.43584	0.206914	0.999988
ENSG00000255330	AL096711.2	0.0205559	0.00529989	0.00467152	0.0666565	0.0361514	0.0935981	4.24007	11.4365	-1.43288	0.241719	0.999988
ENSG00000026559	KCNG1	0.0433424	0.458171	0.0886498	0.0281093	0.0571694	0.020774	6.19741	16.6124	-1.41455	0.247115	0.999988
ENSG00000139155	SLCO1C1	0.0848544	0.350046	0.0220388	0.104822	0.106595	0.116202	6.25212	16.7241	-1.4145	0.13626	0.999988
ENSG00000073754	CD5L	0.887536	0.494772	0.0872221	0.290394	0.59061	3.38017	23.1666	61.6448	-1.41338	0.161901	0.999988
ENSG00000164082	GRM2	0.116232	0.393865	0.0377356	0.0574333	0.0219018	0.0159172	7.52008	19.9778	-1.41208	0.233453	0.999988
ENSG00000100302	RASD2	0.725192	5.12846	0.612139	0.582295	0.95654	0.380687	47.1624	125.241	-1.40743	0.108389	0.999988
ENSG00000109205	ODAM	0.528031	0.31118	0.0685715	1.30457	0.431155	1.08465	9.67364	25.4171	-1.40036	0.12283	0.999988
ENSG00000205277	MUC12	0.037831	0.0461094	0.0156317	0.0356871	0.0181453	0.105497	7.39158	19.333	-1.3935	0.0962729	0.999988
ENSG00000167633	KIR3DL1	0.220413	0.064947	0.0286234	0.408418	0.221507	0.754598	5.30507	13.8445	-1.38876	0.222701	0.999988
ENSG00000188487	INSC	0.39447	0.265319	0.0935447	0.726703	0.060326	0.427461	11.35	29.3815	-1.38497	0.110505	0.999988
ENSG00000157654	PALM2-AKAP2	0	0.18517	0.0195859	0.018631	0.0631537	0.0137691	4.08982	10.7545	-1.37903	0.346566	0.999988
ENSG00000124302	CHST8	0.0965157	0.597228	0.0701892	0.100151	0.135793	0.0925199	5.5632	14.5269	-1.37587	0.186955	0.999988
ENSG00000167676	PLIN4	0.516465	2.97155	0.197678	0.133195	0.637403	0.39954	52.9536	137.298	-1.37338	0.146559	0.999988
ENSG00000171596	NMUR1	0.660943	0.27634	0.227338	2.98122	1.13098	1.95211	40.1292	103.533	-1.3681	0.102862	0.999988
ENSG00000107147	KCNT1	0	0.124678	0.0351666	0.0459966	0.055279	0.0648968	6.63987	17.294	-1.36809	0.205702	0.999988
ENSG00000145721	LIX1	0.114534	0.162415	0	0.0742795	0	0.0548959	2.84001	7.23037	-1.36447	0.403422	0.999988
ENSG00000130598	TNNI2	3.10356	0.786147	1.58386	4.70826	2.29819	12.4744	45.5459	117.156	-1.36414	0.0949561	0.999988
ENSG00000060709	RIMBP2	0.0122037	0.0943935	0.0055468	0.0211055	0.0268281	0	2.59356	6.71968	-1.36232	0.382851	0.999988
ENSG00000122121	XPNPEP2	0.319815	2.81223	0.566146	0.0873315	0.340433	0.258167	25.8652	66.5978	-1.36196	0.185452	0.999988
ENSG00000198597	ZNF536	0.0546061	0.119672	0	0.0354142	0.0240088	0.0458022	4.08869	10.448	-1.3594	0.273781	0.999988
ENSG00000171557	FGG	5.02399	2.64972	20.0234	73.5141	27.4998	58.5762	1139.91	2922.92	-1.35847	0.136008	0.999988
ENSG00000164129	NPY5R	0.0358026	0.0553856	0.0813649	0.278633	0.173155	0.411844	5.75741	14.7912	-1.35587	0.190785	0.999988
ENSG00000143171	RXRG	1.61705	0.292972	0.496609	4.1382	0.941559	3.33063	49.6342	126.096	-1.34725	0.10536	0.999988
ENSG00000253649	PRSS51	0.0582146	0.24015	0.0352795	0.134238	0.0682542	0.037203	2.9591	7.52984	-1.34308	0.254425	0.999988
ENSG00000115523	GNLY	5.77353	0.77665	3.42284	21.623	3.42989	9.4031	232.132	584.688	-1.33317	0.113629	0.999988
ENSG00000172543	CTSW	3.08446	0.954314	10.1252	31.5025	1.38629	4.30373	151.191	380.781	-1.33293	0.1916	0.999988
ENSG00000283378	CNTNAP3C	0.272746	0.738378	0	0.147406	0.299797	0.55559	5.9617	15.0085	-1.32996	0.255377	0.999988
ENSG00000158683	PKD1L1	0.0229905	0.503846	0.0888219	0.0994017	0.151624	0.0606064	16.2711	41.0029	-1.32643	0.163711	0.999988
ENSG00000196557	CACNA1H	1.55395	9.94747	1.08279	0.870169	2.31154	1.5093	256.61	639.256	-1.31644	0.100643	0.999988
ENSG00000166183	ASPG	0.134659	0.0495983	0.0961792	0.632113	0.186075	0.34115	15.3875	37.7521	-1.29771	0.133834	0.999988
ENSG00000267281	AC023509.3	0.0876033	0.338799	0.119452	0.132566	0.0962918	0.272923	4.91711	12.0646	-1.28744	0.152009	0.999988
ENSG00000184434	LRRC19	0.0816199	0.0841756	0.0593564	0.395238	0.172253	0.281666	6.81187	16.5514	-1.2818	0.16248	0.999988
ENSG00000167680	SEMA6B	3.44506	52.6055	6.03275	2.0091	13.6675	1.52321	615.342	1492.48	-1.27817	0.386083	0.999988
ENSG00000170122	FOXD4	0.0895338	0.123116	0.244169	0.645179	0.28868	0.743833	7.40325	17.9868	-1.27811	0.171243	0.999988
ENSG00000147160	AWAT2	0.0480336	0.0247688	0	0.269981	0.168952	0.230225	3.20735	7.75986	-1.2729	0.381998	0.999988
ENSG00000111339	ART4	0.235563	0.347056	0.672998	2.37645	1.35135	2.72048	71.521	172.29	-1.26765	0.114194	0.999988
ENSG00000118194	TNNT2	0.389562	0.10881	0.184441	0.870227	0.2141	0.910246	34.4729	82.6402	-1.26453	0.0978384	0.999988
ENSG00000279968	GVQW2	0.0196837	0.203	0	0.0340417	0.155778	0.188687	3.16452	7.67818	-1.26344	0.39078	0.999988
ENSG00000110675	ELMOD1	0.0905428	0.217882	0.00914521	0.0695947	0.0530789	0.0771504	5.39074	12.8667	-1.25759	0.23065	0.999988
ENSG00000181072	CHRM2	0.0707921	0.0292035	0.0257411	0.0550937	0.0498005	0.264659	7.33821	17.4991	-1.25752	0.21772	0.999988
ENSG00000148795	CYP17A1	0.0684043	0.0352731	0.0466366	0.207027	0.0902264	0.245896	4.26115	10.1345	-1.25411	0.240402	0.999988
ENSG00000140839	CLEC18B	0.0937213	0.193312	0.102235	0.210711	0.0659306	0.215619	4.95994	11.7355	-1.24556	0.146575	0.999988
ENSG00000104321	TRPA1	0.0184768	0.0666937	0.0167961	0.0479316	0.0649898	0.123983	3.85277	9.16895	-1.23904	0.251077	0.999988
ENSG00000019549	SNAI2	8.38888	34.8928	5.28912	4.88107	5.1469	4.46199	384.775	904.167	-1.23247	0.101976	0.999988
ENSG00000114113	RBP2	1.0458	0	0.253512	1.74835	0.674384	2.87383	10.0497	23.5354	-1.23198	0.307516	0.999988
ENSG00000107859	PITX3	0.127059	0.0873587	0.115502	0.292988	0.558645	1.50219	6.71567	15.7793	-1.22702	0.298396	0.999988
ENSG00000115596	WNT6	0	0.285416	0.125788	0.239311	0.152099	0.132646	2.85168	6.74597	-1.22633	0.340059	0.999988
ENSG00000183542	KLRC4	0.0633475	0.130662	0.575853	1.64333	0.278521	0.364349	5.14295	11.9834	-1.22193	0.315155	0.999988
ENSG00000132465	JCHAIN	226.641	1002.83	318.489	210.202	60.7167	199.273	6133.23	14297.4	-1.22103	0.103547	0.999988
ENSG00000176049	JAKMIP2	0.241369	0.117913	0.225188	0.450389	0.245759	1.0899	39.8112	92.6767	-1.21963	0.095305	0.999988
ENSG00000121053	EPX	0	0.0448729	0.0791054	0.0940608	0.0956517	0.271109	2.85168	6.69107	-1.21857	0.381576	0.999988
ENSG00000168280	KIF5C	0.134257	1.26593	0.151103	0.204547	0.359796	0.0306425	35.8243	83.3543	-1.21587	0.229192	0.999988
ENSG00000140955	ADAD2	0.0573225	0.576395	0.0260542	0	0.16382	0	6.12362	14.2786	-1.21522	0.484509	0.999988
ENSG00000075618	FSCN1	18.6059	131.851	25.7183	22.3257	28.5545	14.7457	1621.36	3758.08	-1.21272	0.100663	0.999988
ENSG00000179111	HES7	0.0946144	0.422834	0.0286694	0.190901	0.166397	0.0604648	3.26073	7.58898	-1.21037	0.326674	0.999988
ENSG00000145808	ADAMTS19	0.0435749	0.213462	0	0	0.0574759	0.0208854	3.29302	7.63685	-1.20705	0.493861	0.999988
ENSG00000015568	RGPD5	0.062342	0.265749	0.0491151	0.0610961	0.0475107	0.0398407	13.5785	31.321	-1.20272	0.152108	0.999988
ENSG00000268089	GABRQ	0	0.177194	0.026031	0	0.0503613	0	2.84114	6.59012	-1.20134	0.569119	0.999988
ENSG00000175768	TOMM5	0.0970031	0.750304	0.161662	0.223681	0.270114	0.247965	11.611	26.8318	-1.19871	0.132198	0.999988
ENSG00000168913	ENHO	1.52456	0.33692	1.38588	5.64991	0.670305	2.19216	23.3463	53.3267	-1.19602	0.174108	0.999988
ENSG00000145649	GZMA	15.6838	3.66994	19.4689	68.2664	7.76495	26.342	231.202	529.435	-1.19575	0.140982	0.999988
ENSG00000138684	IL21	0.0357592	0.0921972	0.113773	0.216451	0.0157223	0.0685574	3.28114	7.48948	-1.19548	0.322147	0.999988
ENSG00000151025	GPR158	0.0516394	0.136945	0.0737663	0.172235	0.0194609	0.0212149	6.97133	15.8994	-1.1935	0.232647	0.999988
ENSG00000132437	DDC	0.112717	0.13562	0.102464	0.389873	0.165194	0.342158	7.18796	16.396	-1.19206	0.144937	0.999988
ENSG00000174059	CD34	4.17294	46.2786	6.37261	5.4817	14.0316	4.3371	1365.31	3116.34	-1.19052	0.157561	0.999988
ENSG00000278704	BX004987.1	0.0263358	0.325926	0.0478805	0.227731	0.254741	0.201964	4.43428	10.1856	-1.18475	0.282945	0.999988
ENSG00000183114	FAM43B	0.320678	1.67722	0.353975	0.0198069	0.0805676	0.0219573	11.7048	26.6417	-1.18471	0.391251	0.999988
ENSG00000172116	CD8B	2.27562	0.749696	3.01674	11.0414	1.19507	2.93884	72.8679	165.449	-1.18443	0.150591	0.999988
ENSG00000171509	RXFP1	2.28024	0.352747	0.273236	3.04728	0.43748	3.38805	102.443	232.498	-1.18389	0.188387	0.999988
ENSG00000215704	CELA2B	0.121304	0.458708	0	0.0349646	0.213335	0.271324	2.93802	6.7164	-1.18352	0.421972	0.999988
ENSG00000188611	ASAH2	0.0421712	0.139174	0.122673	0.26985	0.037083	0.0485103	8.49921	19.2578	-1.18176	0.201327	0.999988
ENSG00000204305	AGER	538.189	174.697	84.2894	923.284	355.875	1120.37	12244.8	27764.2	-1.18107	0.117487	0.999988
ENSG00000091409	ITGA6	11.2722	69.5373	7.66467	14.8705	22.568	9.69042	1633.92	3704.35	-1.18081	0.107458	0.999988
ENSG00000128564	VGF	0.0653623	0.381984	0.138639	0.01884	0	0.0626562	3.32398	7.55189	-1.17829	0.444898	0.999988
ENSG00000073861	TBX21	1.66778	0.488109	1.8029	7.50313	1.12964	2.3981	72.4622	163.648	-1.17673	0.139692	0.999988
ENSG00000155897	ADCY8	0.266844	0.071348	0.134762	1.05972	0.286791	0.416853	24.7273	55.6013	-1.17216	0.171509	0.999988
ENSG00000136859	ANGPTL2	5.34748	61.3516	12.614	7.24394	15.5055	6.82511	784.282	1767.45	-1.17204	0.149283	0.999988
ENSG00000139144	PIK3C2G	0	0.0512725	0.00903871	0	0.288534	0.619547	10.6243	23.9504	-1.1713	0.676444	0.999988
ENSG00000021852	C8B	1.48956	0.556595	0.196242	0.802698	0.949157	4.5527	43.3307	97.2199	-1.16704	0.196538	0.999988
ENSG00000177182	CLVS1	0.0318751	0.0657465	0.0362196	0.055126	0	0.0305555	3.03356	6.74597	-1.16084	0.37106	0.999988
ENSG00000175093	SPSB4	0.3623	2.04693	0.22911	0.286046	0.581767	0.286901	26.4395	59.0432	-1.15561	0.176464	0.999988
ENSG00000225968	ELFN1	0.597559	5.75186	1.60176	0.397477	0.592827	0.0734384	64.6922	144.178	-1.15516	0.296231	0.999988
ENSG00000172350	ABCG4	0.00939455	0.203463	0.05978	0.00812364	0.0330442	0.0180112	3.86265	8.67606	-1.15281	0.412421	0.999988
ENSG00000198046	ZNF667	0.133742	0.924128	0.115497	0.364294	0.47042	0.314101	38.205	85.0742	-1.15119	0.110182	0.999988
ENSG00000161940	BCL6B	10.1849	45.9888	5.0211	6.81497	11.195	5.73394	695.692	1542.53	-1.14866	0.131865	0.999988
ENSG00000154342	WNT3A	1.66773	0.808172	0.383575	3.33599	1.9259	4.66123	70.2684	155.572	-1.14735	0.126226	0.999988
ENSG00000196421	C20orf204	0.0430023	0.986762	0.283408	0.204517	0.283604	0.164888	20.1437	44.7829	-1.14651	0.209298	0.999988
ENSG00000137225	CAPN11	0.165999	0.188317	0.10563	0.358857	0.0291941	0.111389	6.43333	14.0838	-1.14371	0.232375	0.999988
ENSG00000081277	PKP1	1.13824	9.61602	0.698423	0.213255	2.93598	0.709223	178.623	394.419	-1.14228	0.276048	0.999988
ENSG00000054356	PTPRN	0.0713149	0.286837	0.0583451	0.00616673	0.00627103	0.00683623	6.76658	14.9259	-1.13989	0.432773	0.999988
ENSG00000178217	SH2D4B	0.179927	0.106035	0.151878	0.466758	0.203423	0.603672	14.7843	32.4969	-1.13878	0.13178	0.999988
ENSG00000188738	FSIP2	0.0150455	0.072411	0.0250744	0.0477038	0.0154352	0.00240377	7.865	17.3451	-1.13857	0.283032	0.999988
ENSG00000253953	PCDHGB4	0.0511844	0.211148	0.0775476	0.287691	0.15753	0.130841	11.9127	26.2038	-1.13271	0.121142	0.999988
ENSG00000089356	FXYD3	0.0706817	0.127566	0.0963786	0.290319	0.139845	0.254083	6.16579	13.4999	-1.12957	0.184511	0.999988
ENSG00000176692	FOXC2	0.711022	6.59957	0.443208	0.122967	2.12579	0.447898	57.3182	125.303	-1.12676	0.310801	0.999988
ENSG00000007264	MATK	1.57918	0.762959	2.41842	7.41822	1.60131	4.03679	139.71	304.875	-1.12634	0.107915	0.999988
ENSG00000110887	DAO	0	0.0312943	0.055168	0.104957	0.0667074	0.130895	2.85168	6.25079	-1.12285	0.40996	0.999988
ENSG00000171560	FGA	1.99554	1.39762	2.28784	11.8602	2.94644	2.44112	172.346	374.234	-1.11908	0.124019	0.999988
ENSG00000168907	PLA2G4F	4.26669	4.79851	1.27239	8.33892	7.92821	16.1103	495.269	1075.61	-1.11882	0.0993315	0.999988
ENSG00000271303	SRXN1	4.47636	10.4041	0.595489	0.717512	0.710446	1.36057	94.0069	202.931	-1.11055	0.26669	0.999988
ENSG00000188649	CC2D2B	0.117935	0.252612	0.107208	0.196117	0.0239321	0.0869635	9.74676	20.9626	-1.10956	0.190321	0.999988
ENSG00000203943	SAMD13	0.0511547	0.281368	0.170506	0.294896	0.194925	0.326912	8.67301	18.8035	-1.10783	0.151908	0.999988
ENSG00000162771	FAM71A	0.0511178	0.0790776	0.162638	0.35362	0	0.0245007	2.96897	6.35028	-1.10492	0.479803	0.999988
ENSG00000169715	MT1E	258.669	567.325	26.5735	142.564	144.827	210.006	2726.3	5831.39	-1.09691	0.150037	0.999988
ENSG00000174473	GALNTL6	0.0764941	0.105186	0.0579467	0.165365	0.0448431	0.109991	9.98447	21.1927	-1.0935	0.112827	0.999988
ENSG00000265817	FSBP	0.0491353	0.168913	0.0595545	0.184116	0.144023	0.188404	5.47753	11.7355	-1.09107	0.222529	0.999988
ENSG00000099769	IGFALS	0.523562	0.359971	0.475938	2.11276	0.613855	0.955973	22.9727	48.8215	-1.09104	0.125135	0.999988
ENSG00000115194	SLC30A3	0.009855	0.050818	0.0537514	0.102262	0.0259978	0.037788	3.22777	6.87553	-1.08855	0.353486	0.999988
ENSG00000174945	AMZ1	0.857103	0.450637	0.435401	0.479569	0.24384	2.32792	64.9062	137.647	-1.0859	0.151544	0.999988
ENSG00000126264	HCST	2.69098	2.37878	5.06713	13.463	2.28178	5.43552	37.0858	78.595	-1.0857	0.124646	0.999988
ENSG00000143185	XCL2	1.56407	1.07536	2.55923	6.67223	1.19197	3.4984	18.0964	38.2881	-1.08519	0.15824	0.999988
ENSG00000180834	MAP6D1	0.0978625	0.126159	0	0.211559	0.17211	0.234527	3.91736	8.3034	-1.08368	0.377807	0.999988
ENSG00000156076	WIF1	17.7138	41.3606	7.10138	59.8713	61.7809	82.1594	1235.66	2616.85	-1.08248	0.122968	0.999988
ENSG00000196381	ZNF781	0.114015	0.789501	0.370157	0.802812	0.529937	0.562087	22.103	46.9562	-1.08172	0.0994082	0.999988
ENSG00000148357	HMCN2	0.552592	4.06386	0.320858	0.502854	1.3967	0.232963	278.557	588.941	-1.07975	0.23918	0.999988
ENSG00000103175	WFDC1	2.0789	1.03742	0.499881	2.99803	0.719432	2.89281	174.597	366.762	-1.07202	0.0965835	0.999988
ENSG00000089163	SIRT4	0.385684	0.447481	0.613552	1.66754	0.169574	0.323502	8.60663	17.9563	-1.06848	0.258197	0.999988
ENSG00000016402	IL20RA	5.56749	3.87926	1.41528	5.42821	8.78384	23.6762	449.384	940.107	-1.06484	0.174307	0.999988
ENSG00000171208	NETO2	2.26014	9.75408	1.71809	1.71604	2.09131	1.22294	273.611	572.195	-1.06407	0.142593	0.999988
ENSG00000107518	ATRNL1	0.0355256	0.0732759	0.0322941	0.076799	0.0260326	0.0454063	5.62711	11.7205	-1.06208	0.211994	0.999988
ENSG00000243566	UPK3B	20.6196	7.5148	4.81184	48.8175	36.8867	73.6924	998.882	2084.13	-1.06108	0.195592	0.999988
ENSG00000167617	CDC42EP5	18.7244	82.1545	9.07399	18.3915	30.7502	21.5765	318.583	664.509	-1.06023	0.117948	0.999988
ENSG00000006283	CACNA1G	0.0788827	0.844817	0.23167	0.0944464	0.154737	0.0290834	27.2217	56.653	-1.05408	0.303841	0.999988
ENSG00000147041	SYTL5	1.52478	0.240952	0.391234	2.80715	0.432519	1.81528	67.8018	140.405	-1.05263	0.208635	0.999988
ENSG00000164483	SAMD3	0.30724	0.114422	0.488762	1.25458	0.150094	0.589039	39.3542	81.4475	-1.05168	0.195009	0.999988
ENSG00000256660	CLEC12B	0.257052	0.0994131	0.0438132	0.361202	0.0141273	0.184808	6.96033	14.2618	-1.05146	0.349659	0.999988
ENSG00000271503	CCL5	37.9117	11.6131	37.8281	140.835	23.6754	53.2246	905.78	1873.9	-1.04896	0.148519	0.999988
ENSG00000179603	GRM8	0.282842	0.159964	0.066352	0.268247	0.00802307	0.306117	13.8989	28.5719	-1.04821	0.292846	0.999988
ENSG00000140600	SH3GL3	1.31385	0.433598	0.0477737	1.56026	0.646984	2.14948	40.7043	83.9644	-1.04695	0.263261	0.999988
ENSG00000111641	NOP2	0.0879864	0.155557	0.0685569	0.0760835	0.0552645	0.204835	5.98212	12.3274	-1.04317	0.232733	0.999988
ENSG00000184160	ADRA2C	1.78443	6.66414	0.663592	2.64185	4.46963	4.95023	90.831	187.189	-1.04188	0.131147	0.999988
ENSG00000165731	RET	0.0852456	1.20443	0.263471	0.228512	0.367305	0.0408581	29.8184	61.376	-1.03793	0.301727	0.999988
ENSG00000165507	DEPP1	96.7846	77.319	89.9224	446.844	130.634	127.394	5696.59	11696.1	-1.03788	0.0989866	0.999988
ENSG00000118298	CA14	0.04611	0.285323	0.0978034	0.159489	0.135155	0.132603	6.44566	13.3366	-1.0372	0.233901	0.999988
ENSG00000132915	PDE6A	0.0953417	0.163879	0.0722243	0.206109	0.16069	0.304648	14.667	30.1438	-1.03719	0.110537	0.999988
ENSG00000174837	ADGRE1	1.27139	0.606432	1.09796	1.53916	1.69096	6.18519	90.6985	186.091	-1.03678	0.167921	0.999988
ENSG00000147570	DNAJC5B	0.802359	0.186184	1.40405	2.18552	0.881937	3.96107	54.6572	112.077	-1.03635	0.217339	0.999988
ENSG00000109943	CRTAM	1.62975	0.658684	1.94197	5.80849	1.25881	3.42012	77.864	159.375	-1.03473	0.138571	0.999988
ENSG00000180644	PRF1	11.7175	4.17201	9.3625	40.5898	8.25936	15.3109	447.998	917.279	-1.0342	0.134527	0.999988
ENSG00000147465	STAR	0.0625572	0.403225	0.0710836	0.0405708	0.0962662	0.0299836	5.21874	10.7545	-1.03211	0.389218	0.999988
ENSG00000214402	LCNL1	0	0.0899674	0.0925174	0.163441	0.166205	0.278747	6.31716	12.9935	-1.0321	0.369464	0.999988
ENSG00000271092	TMEM56-RWDD3	0.0901273	0.154916	0.109239	0.129891	0.0528353	0.230389	2.98018	6.08791	-1.03196	0.359534	0.999988
ENSG00000241370	RPP21	0.0733664	0.189159	0.233425	0.444089	0.2258	0.457138	5.15416	10.5522	-1.02968	0.284708	0.999988
ENSG00000163564	PYHIN1	0.609622	0.401677	1.52397	4.07078	0.759429	1.42849	60.649	123.707	-1.02937	0.184625	0.999988
ENSG00000145362	ANK2	2.42778	8.93499	1.04911	0.819052	1.68571	0.784019	566.93	1157.24	-1.02935	0.225224	0.999988
ENSG00000240403	KIR3DL2	0.40803	0.194218	0.0285319	0.65138	0.248399	0.541574	7.74725	15.6896	-1.02774	0.307796	0.999988
ENSG00000182255	KCNA4	0.210655	0.0869005	0.0893636	0.910787	0.481619	0.592339	19.7586	40.1933	-1.02545	0.259725	0.999988
ENSG00000162078	ZG16B	0.132638	0.182388	0.361718	0.592587	0.116634	0.466203	9.81181	19.9319	-1.025	0.220657	0.999988
ENSG00000111863	ADTRP	2.29974	1.27372	1.21304	2.24642	1.13596	5.93319	116.252	236.402	-1.0249	0.103275	0.999988
ENSG00000155966	AFF2	0.21452	0.715769	0.110886	0.22551	0.321793	0.374989	54.6224	111.09	-1.02207	0.0959736	0.999988
ENSG00000241978	AKAP2	0.089921	0.35549	0.034059	0.0323985	0.105429	0.0790149	10.8683	22.1197	-1.01978	0.302236	0.999988
ENSG00000118514	ALDH8A1	0.123249	0.211848	0.0933653	0.213152	0.0722524	0.157529	4.99224	10.0673	-1.01756	0.255939	0.999988
ENSG00000141540	TTYH2	1.84138	12.1177	3.23817	2.81492	3.43118	2.27998	275.653	557.497	-1.01551	0.125985	0.999988
ENSG00000176887	SOX11	0.0472981	0.355391	0.00614226	0.0058428	0.124774	0	9.36326	18.979	-1.01442	0.527655	0.999988
ENSG00000185155	MIXL1	0.26132	2.6052	0.580678	0.0502152	0.510645	0.0835004	16.538	33.4871	-1.01335	0.404342	0.999988
ENSG00000133800	LYVE1	20.9506	63.9039	14.5808	13.3337	10.0073	14.5724	964.548	1944.61	-1.01152	0.119769	0.999988
ENSG00000154529	CNTNAP3B	0.129235	0.390653	0.0243061	0.161847	0.313495	0.38874	37.2048	74.9807	-1.0088	0.213627	0.999988
ENSG00000163958	ZDHHC19	0.145345	0.27481	0.132124	0.0837884	0.0852055	0.37154	5.31495	10.7001	-1.00767	0.29978	0.999988
ENSG00000181001	OR52N1	0.0694458	0	0.21043	0.560477	0	0	4.29211	8.59535	-1.00736	0.622266	0.999988
ENSG00000136160	EDNRB	35.2408	23.6552	5.7308	40.4494	11.6231	41.5876	1777.01	3571.01	-1.007	0.114866	0.999988
ENSG00000178878	APOLD1	56.6032	186.3	10.7952	29.8148	50.9896	21.6291	5167.06	10376.4	-1.00588	0.22643	0.999988
ENSG00000173421	CCDC36	0.0136058	0.266605	0.21026	0.317661	0.14357	0.15651	9.5871	19.3283	-1.00545	0.277132	0.999988
ENSG00000184254	ALDH1A3	2.66395	12.8842	2.40308	1.76519	2.76437	1.07626	272.385	546.957	-1.00544	0.207287	0.999988
ENSG00000133107	TRPC4	0.322236	1.60384	0.0891511	0.121149	0.640632	0.389477	26.6568	53.5777	-1.00374	0.296929	0.999988
ENSG00000100078	PLA2G3	0	0.270336	0.238284	1.13333	0.94121	0.963222	19.1688	38.466	-1.00239	0.378491	0.999988
ENSG00000101255	TRIB3	1.81852	11.1997	3.49335	2.3736	2.97192	2.97665	171.414	342.464	-0.997481	0.120181	0.999988
ENSG00000258405	ZNF578	0.0409746	0.0676121	0.0297979	0.120467	0.136917	0.227813	8.99705	18.0164	-0.996984	0.272357	0.999988
ENSG00000003989	SLC7A2	8.28735	31.8432	2.89282	3.04178	8.68987	4.76512	946.495	1888.7	-0.996647	0.220104	0.999988
ENSG00000133661	SFTPD	89.0611	138.212	120.487	421.43	301.967	460.514	4071.73	8120.58	-0.995927	0.103621	0.999988
ENSG00000180815	MAP3K15	0.105712	0.119924	0.0960961	0.283374	0.204506	0.405341	13.6448	27.1557	-0.991944	0.176908	0.999988
ENSG00000169169	CPT1C	0.432003	1.54382	0.40184	0.382249	0.627243	0.982326	51.6283	102.77	-0.990468	0.0959774	0.999988
ENSG00000186281	GPAT2	0.849909	2.28751	0.00942195	0.0179252	0.537736	0.466975	47.8508	94.9575	-0.988609	0.58837	0.999988
ENSG00000147127	RAB41	0.131503	0.316448	0.318776	0.568564	0.269818	0.546253	5.83187	11.5914	-0.988187	0.261436	0.999988
ENSG00000110665	C11orf21	1.75379	0.868178	1.64528	4.44041	1.34478	4.08862	120.031	237.773	-0.987155	0.103809	0.999988
ENSG00000163359	COL6A3	12.63	140.969	37.1932	7.5586	27.8248	5.20069	9186.17	18186.9	-0.985357	0.318638	0.999988
ENSG00000162367	TAL1	5.46756	3.68811	1.15565	8.32968	3.52637	8.04509	348.611	689.106	-0.983574	0.103276	0.999988
ENSG00000170296	GABARAP	0.727966	1.23339	0.779918	1.46131	0.25148	0.772594	24.0233	47.3443	-0.982379	0.117715	0.999988
ENSG00000144550	CPNE9	0.050461	0.0780616	0.25229	0.349076	0	0.169301	4.25982	8.39211	-0.982361	0.473274	0.999988
ENSG00000175463	TBC1D10C	3.06778	1.44807	4.61213	10.2744	2.46937	8.29071	305.362	602.137	-0.979863	0.136671	0.999988
ENSG00000181773	GPR3	1.94985	7.55525	0.531745	0.650341	2.59637	1.81572	64.7169	127.718	-0.979461	0.256772	0.999988
ENSG00000102575	ACP5	39.9415	42.7117	93.4954	136.39	45.2739	173.118	3143.42	6195.34	-0.978855	0.0945851	0.999988
ENSG00000106070	GRB10	4.51097	22.585	3.32972	3.20899	7.12417	3.68422	883.273	1739.89	-0.977919	0.182151	0.999988
ENSG00000107295	SH3GL2	0.593086	0.453079	0.319489	1.55755	0.753316	1.2634	26.923	52.9127	-0.977175	0.134535	0.999988
ENSG00000078725	BRINP1	2.9268	0.124472	1.26172	2.77873	0.0132663	5.3654	98.8719	194.568	-0.977025	0.581018	0.999988
ENSG00000043591	ADRB1	15.4252	0.766662	4.03582	23.32	2.66924	19.2998	380.458	745.888	-0.971603	0.307028	0.999988
ENSG00000172476	RAB40A	0.117299	0.0907287	0.306558	0.608582	0.348117	0.815206	18.6909	36.6692	-0.971323	0.250332	0.999988
ENSG00000159674	SPON2	4.84003	33.3042	10.6788	8.67553	10.0887	8.13348	927.85	1815.77	-0.968417	0.122305	0.999988
ENSG00000100311	PDGFB	5.88975	42.1154	7.53264	7.27375	15.3858	6.95228	652.887	1276.88	-0.967454	0.185475	0.999988
ENSG00000036448	MYOM2	1.57669	0.731298	0.409507	3.68622	0.557516	0.543789	108.247	211.126	-0.965529	0.224836	0.999988
ENSG00000274791	F8A2	0	0.21777	0.479878	0.639074	0.139261	0.354228	4.16361	8.14428	-0.965009	0.45609	0.999988
ENSG00000198821	CD247	2.99385	0.813319	3.39859	10.9994	2.88947	6.29979	225.627	440.284	-0.964911	0.188337	0.999988
ENSG00000184937	WT1	0.186208	3.6635	0.585934	0.0371578	1.17137	0.0961145	48.1687	94.1003	-0.964139	0.437867	0.999988
ENSG00000140538	NTRK3	0.178391	0.779065	0.136138	0.125692	0.280812	0.257564	95.9639	187.356	-0.963742	0.156011	0.999988
ENSG00000091128	LAMB4	0.0251909	0.502275	0.0763317	0	0.19198	0.072444	12.4085	24.2976	-0.963064	0.475685	0.999988
ENSG00000204301	NOTCH4	7.74188	22.4445	2.90626	8.10035	9.23115	8.15712	1167.71	2273.35	-0.96107	0.103241	0.999988
ENSG00000259030	FPGT-TNNI3K	0.0535791	0.0552568	0.0108234	0.0978096	0.0471145	0.0627744	6.64995	12.871	-0.960171	0.290679	0.999988
ENSG00000135773	CAPN9	3.08993	0.866967	1.21855	5.67784	1.53837	4.81326	91.3571	177.47	-0.959778	0.169389	0.999988
ENSG00000091136	LAMB1	27.0248	135.399	21.6257	17.4797	41.6094	22.6452	4427.28	8609.52	-0.959483	0.190283	0.999988
ENSG00000267385	AC011498.4	0.392101	0.438077	0.0891087	0.0282548	0.114931	0.689091	6.47683	12.5532	-0.958283	0.415737	0.999988
ENSG00000036530	CYP46A1	0.0818939	1.39681	0.0858977	0.0653679	0.670274	0.169084	47.2281	91.9276	-0.958226	0.378472	0.999988
ENSG00000159761	C16orf86	1.18551	1.08678	0.778319	2.22112	1.56371	3.53555	38.0276	73.774	-0.956579	0.108741	0.999988
ENSG00000082126	MPP4	0.0358935	0.234444	0.0435048	0.0103459	0.0631255	0.0344075	4.22886	8.28413	-0.956334	0.456867	0.999988
ENSG00000185361	TNFAIP8L1	1.59941	13.7883	2.2331	1.87972	4.91087	1.29602	351.259	681.519	-0.955787	0.249682	0.999988
ENSG00000182196	ARL6IP4	0.105921	0.109238	0.0577717	0.21982	0.111769	0.203071	4.61615	8.91735	-0.955686	0.320772	0.999988
ENSG00000223573	TINCR	0.7848	0.589883	0.96734	2.81804	1.38022	2.66496	83.5978	162.076	-0.955444	0.125313	0.999988
ENSG00000198417	MT1F	10.0112	27.6611	2.80671	2.45413	4.14111	2.75046	193.041	374.104	-0.954452	0.280721	0.999988
ENSG00000204882	GPR20	0.155546	0.481251	0.353494	1.04241	1.02584	1.45379	14.0122	27.1816	-0.951184	0.260757	0.999988
ENSG00000103034	NDRG4	5.38017	0.308608	1.09363	3.82326	0.338314	9.03282	395.997	765.28	-0.950804	0.356317	0.999988
ENSG00000154485	MMP21	0.0613999	0.443258	0.195352	0.0796405	0.0269958	0.0294289	3.28114	6.38689	-0.950736	0.501682	0.999988
ENSG00000221883	ARIH2OS	0.514205	0.909097	0.50082	1.11161	0.61365	1.12667	15.7419	30.4208	-0.950483	0.0941733	0.999988
ENSG00000185303	SFTPA2	1920.09	552.717	2210.78	3688.58	1290.29	6217	87874.4	169524	-0.94798	0.17944	0.999988
ENSG00000150510	FAM124A	0.43952	1.98538	0.607301	0.577692	0.463787	0.353911	61.0062	117.803	-0.947569	0.157952	0.999988
ENSG00000184905	TCEAL2	3.11186	1.60465	0.771491	4.52558	1.64806	4.50844	55.5301	106.802	-0.946591	0.146495	0.999988
ENSG00000162616	DNAJB4	26.1629	37.7268	7.21986	29.5587	10.2158	16.675	993.863	1913.94	-0.945588	0.0972403	0.999988
ENSG00000143322	ABL2	6.05708	22.9521	3.72057	2.62844	4.28289	1.49098	1123.22	2162.6	-0.94507	0.261918	0.999988
ENSG00000159167	STC1	11.5583	35.5849	3.36893	2.66443	8.9151	7.60883	596.087	1146.51	-0.943563	0.248887	0.999988
ENSG00000100453	GZMB	13.4862	3.83236	10.5894	31.1581	2.45991	15.9697	225.617	433.287	-0.942178	0.224088	0.999988
ENSG00000124713	GNMT	1.09913	1.30358	0.749361	1.94839	1.98135	4.10912	24.7396	47.5505	-0.941337	0.161911	0.999988
ENSG00000126785	RHOJ	9.66096	29.49	4.5464	10.597	12.0737	10.3479	600.681	1152.74	-0.94022	0.0994342	0.999988
ENSG00000144476	ACKR3	13.5673	63.9331	6.61721	7.12936	22.7593	11.3298	584.308	1121.06	-0.939849	0.23263	0.999988
ENSG00000133063	CHIT1	0.853594	1.19472	2.5634	4.96253	0.0737199	0.533326	162.597	311.646	-0.938959	0.352242	0.999988
ENSG00000105509	HAS1	24.4486	131.385	2.67652	0.250057	43.7141	4.13287	956.606	1833.39	-0.938507	0.62734	0.999988
ENSG00000163072	NOSTRIN	7.80196	3.40374	2.31647	11.8428	4.5507	12.8164	463.891	887.453	-0.936259	0.130161	0.999988
ENSG00000147113	CXorf36	2.74402	32.8382	3.40293	3.66155	15.3796	4.69777	871.689	1668.24	-0.936257	0.288153	0.999988
ENSG00000003137	CYP26B1	0.117474	1.35691	1.00381	1.84879	0.91937	0.698185	61.6678	117.974	-0.934511	0.207992	0.999988
ENSG00000145014	TMEM44	3.41002	10.3639	2.17223	3.12741	3.22574	3.33075	242.078	462.335	-0.93307	0.0952592	0.999988
ENSG00000144847	IGSF11	0	0.0496085	0.0765218	0.0519936	0.0422984	0.126805	3.50765	6.7427	-0.932295	0.476759	0.999988
ENSG00000125255	SLC10A2	0	0	0.0141716	0.444861	0.219338	0	5.31741	10.1302	-0.929803	0.794491	0.999988
ENSG00000147180	ZNF711	0.682847	2.05198	0.481604	1.10968	0.807512	0.598147	59.4612	113.371	-0.92977	0.100529	0.999988
ENSG00000142973	CYP4B1	66.885	47.8912	14.9878	94.9786	80.8163	166.978	3397.86	6471.36	-0.929456	0.161262	0.999988
ENSG00000181215	C4orf50	0	0.011756	0.0155433	0.0418922	0.0225533	0.0191225	4.74578	9.06521	-0.928808	0.452341	0.999988
ENSG00000187193	MT1X	31.2011	70.1818	2.50706	13.9929	21.4758	20.8633	589.576	1122.21	-0.928575	0.262399	0.999988
ENSG00000175536	LIPT2	0.794112	0.563048	0.812113	1.2017	0.48008	2.18855	14.9227	28.2766	-0.925692	0.200435	0.999988
ENSG00000165091	TMC1	0.0420568	0.16482	0.030585	0.0363673	0.0369824	0.00806313	4.62669	8.83143	-0.925657	0.444447	0.999988
ENSG00000159307	SCUBE1	0.878722	0.555759	0.529586	2.82109	1.50698	2.15472	213.176	404.488	-0.924281	0.150705	0.999988
ENSG00000119457	SLC46A2	4.35609	1.84557	1.28428	4.41835	1.5115	7.29062	107.826	204.357	-0.924	0.162566	0.999988
ENSG00000168952	STXBP6	7.22266	1.03184	0.902863	8.38005	1.23941	8.30275	455.234	861.117	-0.919993	0.292186	0.999988
ENSG00000168685	IL7R	56.8328	10.8382	23.4455	118.254	22.5258	65.3646	3754.05	7100.91	-0.919606	0.213574	0.999988
ENSG00000123700	KCNJ2	1.53172	9.20575	3.01525	3.58074	3.54841	2.52144	272.055	514.44	-0.918387	0.116259	0.999988
ENSG00000242028	HYPK	0.138229	0.332634	0.0921473	0.191247	0.0891373	0.0795037	12.3087	23.2443	-0.917375	0.228213	0.999988
ENSG00000178175	ZNF366	0.533554	4.44794	1.94008	1.99929	2.12433	2.24476	110.134	208.197	-0.916832	0.131198	0.999988
ENSG00000114771	AADAC	2.43706	2.6955	1.89431	4.91719	0.124233	0.77872	44.7837	84.343	-0.915588	0.323854	0.999988
ENSG00000176401	EID2B	0.789721	0.944762	0.31587	0.655571	1.02777	2.42248	23.9751	45.2092	-0.914079	0.208762	0.999988
ENSG00000131203	IDO1	10.6951	0.391266	4.82827	25.3545	4.00333	11.0316	383.704	722.685	-0.913701	0.33919	0.999988
ENSG00000204381	LAYN	4.85322	18.8226	3.35566	5.94663	7.59608	4.95765	299.429	563.183	-0.910902	0.131306	0.999988
ENSG00000248592	TMEM110-MUSTN1	0.00939455	0.067821	0.05124	0.0731128	0.0660883	0.0990616	4.78861	9.06896	-0.910109	0.37415	0.999988
ENSG00000162510	MATN1	0.102324	0.0791463	0.0116271	0.154843	0.0449891	0.061305	4.4114	8.1959	-0.909456	0.417446	0.999988
ENSG00000116544	DLGAP3	0.207389	1.29857	0.255854	0.230571	0.468941	0.227203	22.3396	42.0905	-0.908156	0.27222	0.999988
ENSG00000144230	GPR17	0.529359	0.25022	0.0601509	0.55311	0.349116	0.951455	15.1072	28.2433	-0.907441	0.299739	0.999988
ENSG00000160870	CYP3A7	0.0309256	0.0318939	0	0.13371	0.285539	0.429856	7.26555	13.6708	-0.907339	0.523954	0.999988
ENSG00000099957	P2RX6	0.0747313	0.0770714	0.0452891	0.258486	0.186191	0.238791	8.72772	16.3702	-0.906961	0.312591	0.999988
ENSG00000186642	PDE2A	1.63238	16.615	1.14834	1.59597	8.58367	3.09814	491.823	922.205	-0.906637	0.319474	0.999988
ENSG00000125810	CD93	67.4147	174.43	23.3282	41.9819	44.1516	36.4203	5452.62	10219.8	-0.906345	0.175455	0.999988
ENSG00000114200	BCHE	3.74659	10.8623	1.87666	5.95055	7.36229	7.53111	241.163	452.108	-0.906091	0.102989	0.999988
ENSG00000182963	GJC1	1.02044	5.91443	1.42853	1.34712	1.80061	0.697775	221.759	415.348	-0.904677	0.210483	0.999988
ENSG00000102683	SGCG	2.1766	1.7958	0.659536	6.39929	5.04014	6.53765	77.077	144.174	-0.903402	0.232472	0.999988
ENSG00000196739	COL27A1	0.913938	5.40341	1.61949	1.54782	1.72955	1.02144	359.325	672.013	-0.902721	0.159197	0.999988
ENSG00000162817	C1orf115	12.2729	8.81195	5.28796	27.0165	12.4769	20.3029	617.762	1154.41	-0.902253	0.095887	0.999988
ENSG00000164112	TMEM155	0.155701	1.22439	0.15923	0.269274	0.530543	0.093284	15.4216	28.9463	-0.901734	0.362733	0.999988
ENSG00000142606	MMEL1	0.199238	0.0158059	0.0278639	0.384328	0.25606	0.499511	11.1916	20.8388	-0.8996	0.427985	0.999988
ENSG00000087116	ADAMTS2	2.17397	19.1618	5.67089	1.92074	4.50013	1.94805	649.119	1210.98	-0.899404	0.279701	0.999988
ENSG00000196368	NUDT11	0.716345	2.6494	0.696094	0.662157	0.651635	0.544614	29.6641	55.4195	-0.898736	0.205968	0.999988
ENSG00000273291	AC092042.3	0.178093	0.514275	0.194272	0.0924003	0.187926	0.443872	5.58428	10.4705	-0.898612	0.361788	0.999988
ENSG00000106366	SERPINE1	269.265	484.178	49.5923	71.9754	15.7201	67.2024	6431.39	11982.4	-0.89773	0.351591	0.999988
ENSG00000154065	ANKRD29	7.02423	5.65655	2.42172	12.9929	6.8333	11.673	626.933	1167.75	-0.897554	0.0946328	0.999988
ENSG00000234719	NPIPB2	0	0.0223457	0.315141	0.318513	0.0571588	0.353093	6.09987	11.3699	-0.89739	0.525133	0.999988
ENSG00000175274	TP53I11	6.84981	39.1763	10.9806	7.71953	11.1792	7.1275	1283.96	2391.06	-0.896922	0.180198	0.999988
ENSG00000064886	CHI3L2	2.52102	3.46661	5.44483	15.6773	7.49954	9.63231	307.068	571.356	-0.895818	0.149359	0.999988
ENSG00000164318	EGFLAM	1.49239	5.68942	0.589435	0.186899	1.35757	0.522909	118.631	220.722	-0.895182	0.358307	0.999988
ENSG00000114279	FGF12	0.128159	0.272605	0.0728135	0.214717	0.225392	0.307133	18.8965	35.2103	-0.894459	0.1586	0.999988
ENSG00000188517	COL25A1	0.0269502	0.500294	0.0489976	0.0407826	0.231061	0.0322931	16.1763	30.2109	-0.89441	0.439688	0.999988
ENSG00000137872	SEMA6D	0.475051	1.32777	0.613337	2.33374	1.61645	1.36615	139.47	259.242	-0.893747	0.115071	0.999988
ENSG00000188766	SPRED3	0.492283	1.69923	0.273982	0.0694998	0.185523	0	33.6319	62.4992	-0.893706	0.650224	0.999988
ENSG00000167748	KLK1	0.123871	0.02555	0.135125	0.214228	0	0.237486	3.71127	6.83893	-0.893263	0.528225	0.999988
ENSG00000070193	FGF10	0.508716	1.53358	0.266794	0.947468	1.72052	2.15693	45.2876	84.1506	-0.891305	0.219078	0.999988
ENSG00000164690	SHH	0.420976	0.458278	0.988598	1.93136	0.719799	1.55814	64.6439	119.847	-0.890974	0.155015	0.999988
ENSG00000132702	HAPLN2	0.21031	0.216896	0	0.113662	0.577922	1.13402	10.6442	19.7775	-0.890957	0.489068	0.999988
ENSG00000185304	RGPD2	0.176161	0.311446	0.20589	0.47875	0.0885177	0.0804131	19.9142	36.8437	-0.890955	0.243991	0.999988
ENSG00000127533	F2RL3	12.5867	32.8194	3.42328	9.47579	11.5454	8.79715	576.672	1069.25	-0.890686	0.180468	0.999988
ENSG00000188739	RBM34	0.132474	0.214692	0.240848	0.343659	0.249622	0.598666	11.6855	21.7038	-0.890463	0.224952	0.999988
ENSG00000179168	GGN	0.240757	0.720058	0.0875429	0.0208187	0.169366	0.184631	7.33821	13.6468	-0.890457	0.442964	0.999988
ENSG00000117560	FASLG	0.655285	0.28963	0.737507	1.78086	0.329269	1.10675	19.5915	36.1468	-0.889164	0.246668	0.999988
ENSG00000254788	CKLF-CMTM1	0.0833874	0.472992	0.113704	0.10816	0.219979	0.199838	3.55115	6.64975	-0.887833	0.444325	0.999988
ENSG00000151967	SCHIP1	0.27742	0.945742	0.0770566	0.113281	0.420132	0.37674	35.6843	66.1422	-0.887759	0.291965	0.999988
ENSG00000189367	KIAA0408	0.0325983	0.0252143	0.0222248	0.084565	0.0931615	0.164055	6.44633	11.9285	-0.884909	0.396849	0.999988
ENSG00000182950	ODF3L1	3.15255	2.84485	0.582113	1.70379	1.60266	5.28855	38.4656	70.8957	-0.884018	0.216932	0.999988
ENSG00000150625	GPM6A	5.43943	2.76173	1.13347	8.3796	4.18708	8.70375	456.459	841.867	-0.8834	0.172279	0.999988
ENSG00000102934	PLLP	6.2021	2.27842	3.69722	11.176	4.85969	13.7559	775.517	1429.77	-0.882714	0.153557	0.999988
ENSG00000274736	CCL23	4.07124	0.987934	3.12038	6.14357	2.66746	11.0193	43.844	80.7182	-0.882228	0.24567	0.999988
ENSG00000136197	C7orf25	0.0544149	0.0187063	0.115419	0.250952	0.127598	0.278198	5.82133	10.7226	-0.882191	0.422331	0.999988
ENSG00000163508	EOMES	0.483423	0.0830935	1.47948	3.65075	0.96355	1.65283	64.4712	118.671	-0.880805	0.351054	0.999988
ENSG00000213714	FAM209B	0.424447	0.35019	0.231503	0.367027	0.223941	0.895123	3.67965	6.7427	-0.8804	0.422147	0.999988
ENSG00000019169	MARCO	71.0416	36.56	74.3682	80.1273	58.508	258.412	2554.63	4699.14	-0.879299	0.173956	0.999988
ENSG00000185585	OLFML2A	3.13517	15.4912	2.64358	3.34538	6.92678	4.52898	516.484	949.818	-0.878573	0.179856	0.999988
ENSG00000173991	TCAP	1.11	0.372046	0.731548	1.39176	0.658848	2.81972	31.9872	58.6364	-0.876838	0.232179	0.999988
ENSG00000116833	NR5A2	1.0054	5.77116	1.09107	0.855908	1.88469	0.687342	181.339	333.167	-0.876757	0.256629	0.999988
ENSG00000143179	UCK2	1.53389	6.53404	1.66718	1.54985	1.73001	0.966941	209.988	385.426	-0.875562	0.19499	0.999988
ENSG00000177494	ZBED2	3.90036	1.89294	1.57581	4.71739	1.81575	6.74464	101.545	185.977	-0.874722	0.144429	0.999988
ENSG00000012171	SEMA3B	13.7069	8.08983	5.11589	25.0124	15.2774	29.3924	1185.22	2172.13	-0.874024	0.142816	0.999988
ENSG00000173210	ABLIM3	4.23197	16.3395	1.94945	4.13188	7.66498	4.90094	602.827	1104.63	-0.873505	0.190403	0.999988
ENSG00000169418	NPR1	7.63057	18.9573	3.33979	7.42309	12.5811	16.7515	710.012	1300.31	-0.872765	0.12927	0.999988
ENSG00000172232	AZU1	0.264333	0.238534	0.0901083	0.0857151	0.203385	0.69682	5.99333	10.9704	-0.872759	0.411726	0.999988
ENSG00000111404	RERGL	0.608529	0.078448	0.10372	1.24974	0.200665	0.328126	8.52117	15.4601	-0.872585	0.438944	0.999988
ENSG00000154025	SLC5A10	0.0273972	0.0847654	0.058112	0.0552788	0.0240916	0.0612802	4.26048	7.82603	-0.87198	0.386757	0.999988
ENSG00000040731	CDH10	0.0160965	0.0996032	0.131691	0.40365	0.127389	0	6.06891	11.099	-0.871324	0.53611	0.999988
ENSG00000204186	ZDBF2	0.993405	5.66822	0.824517	0.87769	2.15538	0.724558	261.26	478.062	-0.871142	0.263496	0.999988
ENSG00000166573	GALR1	0	0.206479	0	0	0.130783	0.0329007	8.11638	14.856	-0.870275	0.804899	0.999988
ENSG00000170477	KRT4	3.27296	0.440275	1.3906	5.61423	3.81655	9.42941	169.243	309.022	-0.868886	0.299692	0.999988
ENSG00000162654	GBP4	12.7596	7.26874	12.5167	36.9915	9.30917	18.8677	1276.91	2330.71	-0.868253	0.129227	0.999988
ENSG00000163734	CXCL3	28.3283	34.3355	5.28545	21.2819	6.46687	17.5098	535.931	977.809	-0.86779	0.190843	0.999988
ENSG00000113721	PDGFRB	18.0528	109.461	21.2131	15.7819	37.0336	13.8871	3281.37	5983.5	-0.866644	0.251552	0.999988
ENSG00000257950	P2RX5-TAX1BP3	0.0698378	0.205785	0.0453466	0.189797	0.210554	0.200839	11.5906	21.2222	-0.866537	0.271129	0.999988
ENSG00000177990	DPY19L2	0.198256	1.14069	0.26559	0.49626	0.743217	0.570143	41.0666	75.0896	-0.866322	0.189859	0.999988
ENSG00000177464	GPR4	8.63561	25.2305	2.46912	3.09386	5.56759	2.04707	315.962	575.577	-0.865124	0.314197	0.999988
ENSG00000204475	NCR3	1.11799	0.250652	1.3256	5.0439	1.11133	1.1649	25.9627	47.1754	-0.865025	0.339277	0.999988
ENSG00000170385	SLC30A1	13.087	48.0048	10.7324	4.4857	6.93698	3.52834	1014.51	1847.81	-0.864963	0.310977	0.999988
ENSG00000143494	VASH2	0.188035	1.55807	0.642464	0.319587	0.285081	0.155388	61.0789	111.311	-0.863903	0.302336	0.999988
ENSG00000167664	TMIGD2	1.12038	0.337009	0.806286	2.5835	0.574699	1.61099	19.0219	34.4603	-0.863789	0.274495	0.999988
ENSG00000171680	PLEKHG5	1.81259	10.3718	2.30072	1.5746	3.81945	2.46619	337.144	612.541	-0.860903	0.215013	0.999988
ENSG00000143248	RGS5	28.6404	110.969	20.131	31.398	38.5746	16.0456	3590.12	6511.14	-0.858846	0.198689	0.999988
ENSG00000178187	ZNF454	0.221312	0.639077	0.140827	0.459294	0.486523	0.445513	13.6132	24.7651	-0.857658	0.230311	0.999988
ENSG00000268350	FAM156A	0.0356617	0.101141	0.0648358	0.0616748	0.0313589	0.0769169	5.25036	9.54585	-0.857375	0.351471	0.999988
ENSG00000243444	PALM2	0.0953481	0.295001	0.0108344	0.0309185	0.0733633	0	5.34791	9.70776	-0.856463	0.569022	0.999988
ENSG00000132688	NES	9.80474	34.85	7.92042	9.84404	10.9985	7.31583	962.003	1741.9	-0.856414	0.155637	0.999988
ENSG00000167261	DPEP2	6.2989	2.31012	4.31742	8.12647	2.82869	13.8844	283.399	512.648	-0.855609	0.179049	0.999988
ENSG00000153902	LGI4	1.42993	1.70262	0.555396	1.53999	1.95469	3.88789	107.598	194.728	-0.855558	0.155377	0.999988
ENSG00000110025	SNX15	0.0359592	0.148341	0.0544805	0.124378	0.147562	0.160862	7.04892	12.8414	-0.855094	0.33354	0.999988
ENSG00000137077	CCL21	36.0238	109.483	35.4711	23.4317	60.6073	106.042	735.529	1330.48	-0.854876	0.150188	0.999988
ENSG00000113088	GZMK	2.96442	1.35448	3.85455	11.2595	1.58385	2.55393	79.4955	143.497	-0.853784	0.264234	0.999988
ENSG00000162494	LRRC38	0	1.23771	0.145462	0.0230617	0.562843	0.0255655	9.42831	17.1226	-0.853371	0.595829	0.999988
ENSG00000146374	RSPO3	1.59375	5.65724	1.44878	1.65057	2.98217	3.58848	115.41	208.731	-0.85326	0.131716	0.999988
ENSG00000067715	SYT1	0.208655	0.813973	0.164935	0.211806	0.255275	0.113053	24.6086	44.5646	-0.853108	0.276502	0.999988
ENSG00000156298	TSPAN7	11.6311	5.54832	4.54609	20.1153	8.51201	18.8852	462.685	834.861	-0.851874	0.142425	0.999988
ENSG00000112139	MDGA1	0.614588	2.04282	0.913523	1.82056	0.916547	0.549336	208.99	377.237	-0.851703	0.11821	0.999988
ENSG00000117215	PLA2G2D	0.747128	0.65721	4.49449	9.08278	0.792243	1.13749	97.4788	175.729	-0.850746	0.384722	0.999988
ENSG00000176919	C8G	0.30684	0.316448	0.418393	1.06132	0.449696	0.73534	8.15609	14.6687	-0.850448	0.302221	0.999988
ENSG00000181036	FCRL6	2.31594	0.181978	2.46619	7.43838	0.969767	2.7275	92.577	166.549	-0.848412	0.359133	0.999988
ENSG00000143167	GPA33	2.77997	2.06957	0.803315	1.3691	0.890398	4.60617	86.2646	155.126	-0.847958	0.20432	0.999988
ENSG00000177098	SCN4B	5.45435	12.5517	2.99578	10.0462	6.02511	3.43903	492.737	886.296	-0.846946	0.123789	0.999988
ENSG00000170290	SLN	0.585231	0.938865	0.236443	0.0562289	0.11436	0.685668	5.11019	9.17598	-0.846082	0.485133	0.999988
ENSG00000180616	SSTR2	0.757799	3.96954	0.204614	0.18815	1.51747	0.302078	117.335	211.014	-0.845859	0.408491	0.999988
ENSG00000167641	PPP1R14A	21.5871	29.1444	7.84941	32.9214	43.3836	68.7773	658.643	1183.45	-0.845342	0.18316	0.999988
ENSG00000154165	GPR15	0.0470553	0.0485287	0.3422	0.569654	0.0827555	0.225536	3.56102	6.36531	-0.842805	0.532718	0.999988
ENSG00000147485	PXDNL	0.134967	0.904758	0.214708	0.126434	0.276926	0.0970346	19.7777	35.6106	-0.842606	0.354268	0.999988
ENSG00000130720	FIBCD1	0.507475	1.47494	0.419376	0.611693	0.432722	0.353792	31.3858	56.3372	-0.842052	0.18958	0.999988
ENSG00000178860	MSC	2.81601	12.0193	3.80178	2.89314	2.25559	0.988899	112.981	202.466	-0.840836	0.278745	0.999988
ENSG00000130755	GMFG	64.8836	48.6064	25.1598	60.7559	22.4604	91.8747	1010.12	1806.81	-0.839139	0.110092	0.999988
ENSG00000168497	CAVIN2	263.148	98.5035	42.8899	344.566	103.097	288.789	7960.72	14240.1	-0.839018	0.22178	0.999988
ENSG00000128917	DLL4	4.78879	28.4711	3.45331	5.43567	14.9398	7.56784	665.065	1189.87	-0.838966	0.255601	0.999988
ENSG00000177025	C19orf18	0.32193	0.199206	0.292647	0.556758	0.396322	1.04925	5.57374	9.95329	-0.838538	0.394174	0.999988
ENSG00000007350	TKTL1	0.080703	0.0665841	0	0.181442	0.0851589	0.0464171	3.64802	6.47608	-0.837012	0.536442	0.999988
ENSG00000119326	CTNNAL1	28.036	12.0895	10.0746	50.2112	10.457	24.4222	916.32	1636.19	-0.8367	0.180313	0.999988
ENSG00000038295	TLL1	1.13566	3.0694	0.505498	1.23261	1.5496	1.39646	144.626	258.291	-0.835905	0.143382	0.999988
ENSG00000163637	PRICKLE2	2.38497	4.95639	0.660941	1.87233	1.57379	1.40927	410.521	732.053	-0.834492	0.183705	0.999988
ENSG00000106665	CLIP2	3.85775	17.376	5.05893	4.7705	5.63021	3.79068	641.213	1143.29	-0.834047	0.168059	0.999988
ENSG00000182993	C12orf60	0.127739	0.171261	0.139344	0.441833	0.303281	0.404086	15.8511	28.2686	-0.83388	0.238324	0.999988
ENSG00000113302	IL12B	0.106688	0.0440116	0.271554	0.516629	0.0187631	0.14318	6.60512	11.7097	-0.833843	0.493524	0.999988
ENSG00000186994	KANK3	16.8019	15.8911	4.88754	22.9061	13.3188	23.5702	758.17	1350.68	-0.833279	0.102192	0.999988
ENSG00000130158	DOCK6	5.50994	14.7559	2.69171	5.05951	5.90331	5.30907	1056.9	1882.61	-0.832793	0.132108	0.999988
ENSG00000114790	ARHGEF26	6.34318	6.44218	3.52216	15.8426	9.57953	12.3257	643.156	1144.77	-0.831914	0.108129	0.999988
ENSG00000163380	LMOD3	0.0826659	0.255763	0.187866	0.154879	0.0484611	0.158487	8.21934	14.6645	-0.831811	0.327015	0.999988
ENSG00000063660	GPC1	7.55854	24.5512	4.98887	4.17492	6.02642	4.3075	729.29	1297.05	-0.830537	0.226614	0.999988
ENSG00000168874	ATOH8	9.27912	5.9798	3.31409	22.1599	16.0889	22.8555	1050.14	1867.09	-0.830241	0.212682	0.999988
[truncated: 15,663 more rows]
